# Supplementary material for: 3,4-Alkadienyl ketones via the palladium-catalyzed decarboxylative allenylation of 3-oxocarboxylic acids
Source: Royal Society of Chemistry journal article supplement (doi:10.1039/c7cc02050c), 2017-01-01
Supplement: c7cc02050c1.pdf [file c7cc02050c1.pdf]

## 3,4-Alkadienyl Ketones *via* the Palladium-Catalyzed Decarboxylative Allenylation of 3-Oxocarboxylic acids

Tonghao Zhu<sup>a</sup> and Shengming Ma<sup>a,b</sup>

<sup>a</sup> Department of Chemistry, Fudan University, 220 Handan Lu, Shanghai 200433, P. R. China

<sup>b</sup> State Key Laboratory of Organometallic Chemistry, Shanghai Institute of Organic Chemistry, Chinese Academy of Sciences, 345 Lingling Lu, Shanghai 200032, P. R. China

Fax: (+86)21-64167510      E-mail: [masm@sioc.ac.cn](mailto:masm@sioc.ac.cn)

### Supporting Information

#### Table of Contents

|                                                                      |          |
|----------------------------------------------------------------------|----------|
| General Information                                                  | S2       |
| Experimental Details and Analytical Data                             | S2-S28   |
| References                                                           | S28      |
| <sup>1</sup> H, <sup>13</sup> C, and <sup>19</sup> F NMR of Products | S29-S106 |

**General Information.** All reactions were carried out in oven dried Schlenk tubes under argon atmosphere. All of 2,3-dien-1-ols were prepared as reported in the reference.<sup>1</sup> The starting materials **1a-c** were prepared according to the reported method.<sup>2</sup> *Tert*-butyl 1-phenylbuta-2,3-dienyl carbonate **1m** were prepared according to the literature.<sup>3</sup> 3-Oxocarboxylic acids **2a-i** were freshly prepared according to the literature.<sup>4</sup> Pd<sub>2</sub>(dba)<sub>3</sub>·CHCl<sub>3</sub> was purchased from Alfa Aesar. Binap was purchased from Boka. LiOBu<sup>t</sup> was purchased from Acros. THF, Et<sub>2</sub>O, MTBE, Toluene, 1,4-dioxane, and DME were distilled over sodium wire using benzophenone as the indicator under argon atmosphere. MeCN, DCM, and DMSO were dried over CaH<sub>2</sub> and distilled right before use. All the temperatures are referred to the bath temperature. NMR spectra were taken using TMS (<sup>1</sup>H, δ = 0), CDCl<sub>3</sub> (<sup>1</sup>H, δ = 7.26), DMSO-*d*<sub>6</sub> (<sup>13</sup>C CPD, δ = 39.5) and CFCl<sub>3</sub> (<sup>19</sup>F CPD, δ = 0), and CFCl<sub>3</sub> (<sup>19</sup>F CPD, δ = 0) as the internal standards, respectively.

## Synthesis of benzyl carbonates of 2,3-dien-1-ols

### 1. Synthesis of benzyl nona-1,2-dien-4-yl carbonate (**1e**, zth-5-144):

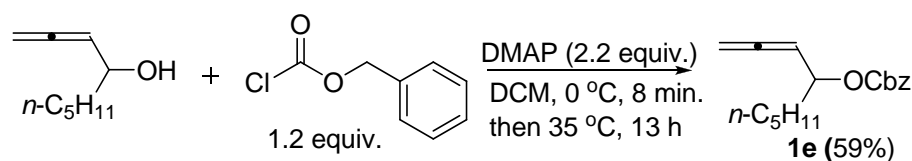

**Typical Procedure I:** DMAP (806.7 mg, 6.6 mmol), nona-1,2-dien-4-ol (420.9 mg, 3.0 mmol), and DCM (3 mL) were added sequentially into a flask under Argon. Then benzyl chloroformate (0.5 mL, d = 1.212 g/mL, 630.2 mg, 3.6 mmol) was added dropwise within 8 min at 0 °C. Then, the resulting mixture was allowed to stir at 35 °C in the oil bath for 13 hours as monitored by TLC. Upon completion, water (20 mL) and DCM (20 mL) were added and the organic phase was separated. The aqueous phase was extracted with DCM (10 mL × 3). The combined organic phase was washed with brine and dried over anhydrous Na<sub>2</sub>SO<sub>4</sub>. After filtration and evaporation, a ~ 5 mL residue was mixed with pre-treated silica gel (saturated with Et<sub>3</sub>N then evaporated to dry). After complete evaporation, the silica gel loaded with the crude product was submitted to column chromatography on silica gel (eluent: petroleum

ether / diethyl ether / triethylamine = 1000/1/1. It should be noted that the column packed with silica gel was eluted with a mixture of petroleum ether (200 mL) and triethylamine (0.8 mL) before loading the sample) to afford **1e** (488.0 mg, 59%) as a liquid:  $^1\text{H}$  NMR (400 MHz,  $\text{CDCl}_3$ )  $\delta$  7.44 – 7.30 (m, 5H, ArH), 5.23 (q,  $J$  = 6.8 Hz, 1H, =CH), 5.16 (s, 2H,  $\text{CH}_2$ ), 5.14 – 5.06 (m, 1H, CH), 4.94 – 4.77 (m, 2H, = $\text{CH}_2$ ), 1.84 – 1.60 (m, 2H,  $\text{CH}_2$ ), 1.48 – 1.18 (m, 6H,  $\text{CH}_2$ ), 0.88 (t,  $J$  = 7.0 Hz, 3H,  $\text{CH}_3$ );  $^{13}\text{C}$  NMR (100 MHz,  $\text{CDCl}_3$ )  $\delta$  208.4, 154.5, 135.2, 128.4, 128.3, 128.1, 90.3, 77.1, 76.1, 69.3, 34.0, 31.3, 24.7, 22.4, 13.8; IR (neat,  $\text{cm}^{-1}$ ): 2954, 2932, 2861, 1958, 1741, 1587, 1498, 1456, 1383, 1247; MS (ESI)  $m/z$  297 ( $\text{M}+\text{Na}$ ) $^+$ ; HRMS (ESI) Calcd for  $\text{C}_{17}\text{H}_{26}\text{NO}_3$  ( $\text{M}+\text{NH}_4$ ) $^+$ : 292.1907, Found: 292.1909.

## 2. Synthesis of benzyl deca-1,2-dien-4-yl carbonate (**1f**, zth-5-105):

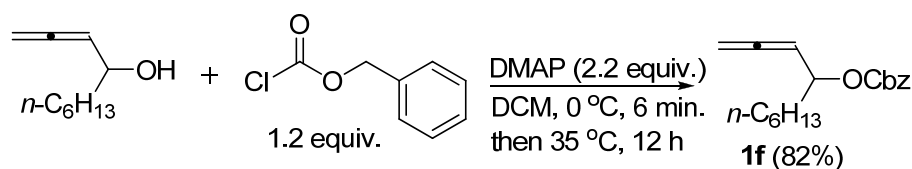

According to **Typical Procedure I**, the reaction of deca-1,2-dien-4-ol (1.5427 g, 10.0 mmol), DMAP (2.6897 g, 22.0 mmol), and benzyl chloroformate (1.70 mL, d = 1.212 g/mL, 2.0604 g, 12.0 mmol) in DCM (10 mL) afforded **1f** (2.3575 g, 82%) (eluent: petroleum ether / diethyl ether / triethylamine = 1000/1/1 to 1000/4/1. It should be noted that the column packed with silica gel was eluted with a mixture of petroleum ether (200 mL) and triethylamine (0.8 mL) before loading the sample) as a liquid:  $^1\text{H}$  NMR (400 MHz,  $\text{CDCl}_3$ )  $\delta$  7.46 – 7.27 (m, 5H, ArH), 5.23 (q,  $J$  = 6.7 Hz, 1H, =CH), 5.16 (s, 2H,  $\text{CH}_2$ ), 5.14 – 5.05 (m, 1H, CH), 4.94 – 4.76 (m, 2H, = $\text{CH}_2$ ), 1.82 – 1.60 (m, 2H,  $\text{CH}_2$ ), 1.46 – 1.18 (m, 8H,  $\text{CH}_2$ ), 0.87 (t,  $J$  = 6.4 Hz, 3H,  $\text{CH}_3$ );  $^{13}\text{C}$  NMR (100 MHz,  $\text{CDCl}_3$ )  $\delta$  208.5, 154.6, 135.3, 128.5, 128.4, 128.2, 90.4, 77.2, 76.3, 69.4, 34.1, 31.6, 28.8, 25.0, 22.5, 14.0; IR (neat,  $\text{cm}^{-1}$ ): 2931, 2859, 1958, 1741, 1587, 1498, 1456, 1384, 1246; MS (ESI)  $m/z$  311 ( $\text{M}+\text{Na}$ ) $^+$ ; HRMS (ESI) Calcd for  $\text{C}_{18}\text{H}_{28}\text{NO}_3$  ( $\text{M}+\text{NH}_4$ ) $^+$ : 306.2064, Found: 306.2064.

### 3. Synthesis of benzyl buta-2,3-dienyl carbonate (**1g**, zth-4-165)

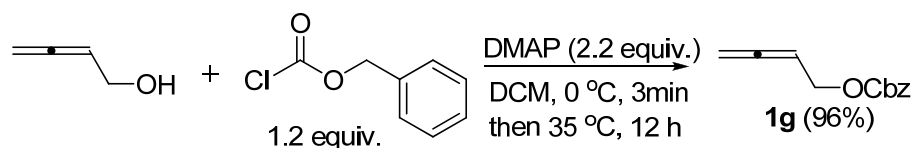

**Typical Procedure II:** buta-2,3-dien-1-ol (0.3506 g, 5.0 mmol)/DCM(4 mL), DMAP (1.3445 g, 11.0 mmol), and DCM (1 mL) were added sequentially into a flask under Argon. Then benzyl chloroformate (0.86 mL, d = 1.212 g/mL, 1.0908 g, 3.6 mmol) was added dropwise within 3 min at 0 °C. The resulting mixture was allowed to stir at 35 °C in the oil bath for 12 hours as monitored by TLC. Upon completion, water (20 mL) and DCM (50 mL) were added and the organic phase was separated. The aqueous phase was extracted with DCM (20 mL  $\times$  3), the combined organic phase was washed with brine, and dried over anhydrous Na<sub>2</sub>SO<sub>4</sub>. After filtration and evaporation, a  $\sim$  5 mL residue was mixed with pre-treated silica gel (saturated with Et<sub>3</sub>N then evaporated to dry). After complete evaporation the silica gel loaded with the crude product was submitted to column chromatography on silica gel (eluent: petroleum ether / diethyl ether / triethylamine = 1000/1/1. It should be noted that the column packed with silica gel was eluted with a mixture of petroleum ether (200 mL) and triethylamine (0.8 mL) before loading the sample) to afford **1g** (0.9816 g, 96%) as a liquid: <sup>1</sup>H NMR (400 MHz, CDCl<sub>3</sub>)  $\delta$  7.41 – 7.30 (m, 5H, ArH), 5.32 (quint,  $J$  = 6.8 Hz, 1H, =CH), 5.17 (s, 2H, CH<sub>2</sub>), 4.86 (dt,  $J$  = 6.7 Hz, 2.1 Hz, 2H, =CH<sub>2</sub>), 4.64 (dt,  $J$  = 7.1 Hz, 2.3 Hz, 2H, CH<sub>2</sub>); <sup>13</sup>C NMR (100 MHz, CDCl<sub>3</sub>)  $\delta$  209.8, 154.8, 135.1, 128.44, 128.39, 128.2, 85.8, 76.7, 69.5, 65.5; IR (neat, cm<sup>-1</sup>): 1958, 1742, 1498, 1455, 1390, 1370, 1323, 1239; MS (ESI)  $m/z$  205 (M+H)<sup>+</sup>, 227 (M+Na)<sup>+</sup>, 237(M+H+CH<sub>3</sub>OH)<sup>+</sup>; HRMS (ESI) Calcd for C<sub>12</sub>H<sub>13</sub>O<sub>3</sub> (M+H)<sup>+</sup>: 205.0859, Found: 205.0860.

### 4. Synthesis of benzyl 1-phenylhexa-4,5-dien-3-yl carbonate (**1h**, zth-5-013)

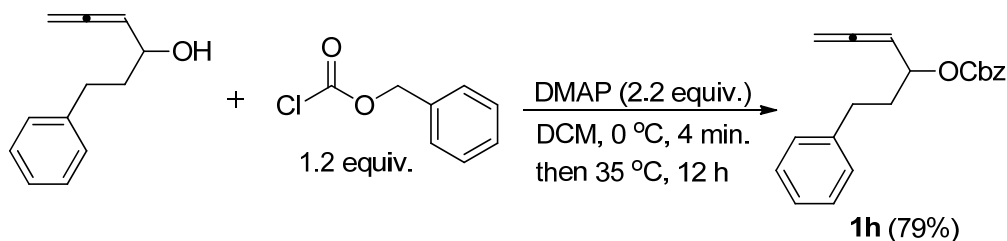

According to **Typical Procedure II**, the reaction of 1-phenylhexa-4,5-dien-3-ol (0.8714 g, 5.0 mmol), DMAP (1.3451 g, 11.0 mmol), and benzyl chloroformate (0.90 mL, d = 1.212 g/mL, 1.0908 g, 6.0 mmol) in DCM (5 mL) afforded **1h** (1.2116 g, 79%) (eluent: petroleum ether / diethyl ether / triethylamine = 1000/1/1 to 1000/2/1). It should be noted that the column packed with silica gel was eluted with a mixture of petroleum ether (200 mL) and triethylamine (0.8 mL) before loading the sample) as a liquid:  $^1\text{H}$  NMR (400 MHz,  $\text{CDCl}_3$ )  $\delta$  7.44 – 7.22 (m, 7H, ArH), 7.22 – 7.10 (m, 3H, ArH), 5.33 – 5.23 (m, 1H, =CH), 5.21 – 5.06 (m, 3H,  $\text{CH}_2$ +CH), 4.95 – 4.78 (m, 2H, = $\text{CH}_2$ ), 2.80 – 2.60 (m, 2H,  $\text{CH}_2$ ), 2.15 – 1.90 (m, 2H,  $\text{CH}_2$ );  $^{13}\text{C}$  NMR (100 MHz,  $\text{CDCl}_3$ )  $\delta$  208.5, 154.5, 140.9, 135.2, 128.5, 128.44, 128.39, 128.31, 128.28, 126.0, 90.2, 77.6, 75.4, 69.5, 35.7, 31.4; IR (neat,  $\text{cm}^{-1}$ ): 3086, 3064, 3030, 2953, 2863, 1957, 1739, 1603, 1586, 1497, 1455, 1384, 1318, 1245, 1180, 1129, 1081, 1015; MS (ESI)  $m/z$  331 ( $\text{M}+\text{Na}$ ) $^+$ ; HRMS (ESI) Calcd for  $\text{C}_{20}\text{H}_{24}\text{NO}_3$  ( $\text{M}+\text{NH}_4$ ) $^+$ : 326.1751, Found: 326.1751.

## 5. Synthesis of benzyl tetradeca-1,2,13-trien-4-yl carbonate (**1i**, zth-5-007)

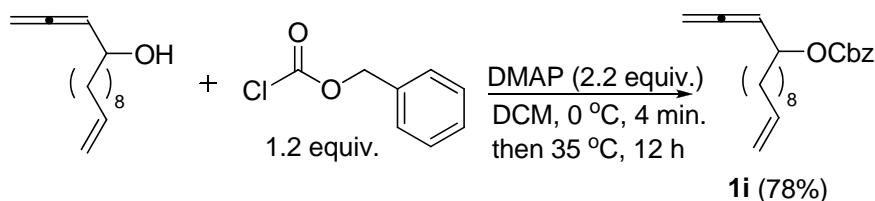

According to **Typical Procedure II**, the reaction of tetradeca-1,2,13-trien-4-ol (1.0418 g, 5.0 mmol), DMAP (1.3456 g, 11.0 mmol), and benzyl chloroformate (0.90 mL, d = 1.212 g/mL, 1.0908 g, 6.0 mmol) in DCM (5 mL) afforded **1i** (1.3412 g, 78%) (eluent: petroleum ether / diethyl ether / triethylamine = 1000/1/1 to 1000/4/1). It should be noted that the column packed with silica gel was eluted with a mixture of petroleum ether (200 mL) and triethylamine (0.8 mL) before loading the sample) as a

liquid:  $^1\text{H}$  NMR (400 MHz,  $\text{CDCl}_3$ )  $\delta$  7.41 – 7.30 (m, 5H, ArH), 5.87 – 5.75 (m, 1H, =CH), 5.23 (q,  $J$  = 6.7 Hz, 1H, =CH), 5.16 (s, 2H,  $\text{CH}_2$ ), 5.14 – 5.06 (m, 1H, CH), 4.99 (dq,  $J$  = 17.2 Hz, 1.7 Hz, 1H, one proton of = $\text{CH}_2$ ), 4.95 – 4.90 (m, 1H, one proton of = $\text{CH}_2$ ), 4.90 – 4.78 (m, 2H, = $\text{CH}_2$ ), 2.08 – 1.98 (m, 2H,  $\text{CH}_2$ ), 1.80 – 1.60 (m, 2H,  $\text{CH}_2$ ), 1.44 – 1.18 (m, 12H,  $\text{CH}_2$ );  $^{13}\text{C}$  NMR (100 MHz,  $\text{DMSO}-d_6$ )  $\delta$  207.6, 153.9, 138.6, 135.5, 128.3, 128.1, 127.9, 114.3, 90.2, 77.4, 75.3, 68.7, 33.6, 33.2, 28.9, 28.8, 28.6, 28.5, 28.3, 24.6; IR (neat,  $\text{cm}^{-1}$ ): 3070, 3035, 2926, 2855, 1958, 1742, 1640, 1587, 1498, 1456, 1384, 1248; MS (ESI)  $m/z$  365 ( $\text{M}+\text{Na}$ ) $^+$ ; HRMS (ESI) Calcd for  $\text{C}_{22}\text{H}_{34}\text{NO}_3$  ( $\text{M}+\text{NH}_4$ ) $^+$ : 360.2533, Found: 360.2534.

## 6. Synthesis of benzyl 9-(tetrahydro-2H-pyran-2-yloxy)nona-1,2-dien-4-yl carbonate (**1j**, zth-5-045)

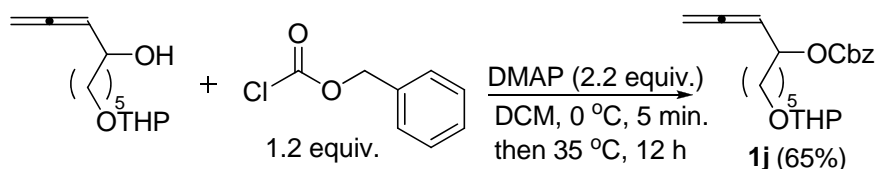

According to **Typical Procedure I**, the reaction of 9-(tetrahydro-2H-pyran-2-yloxy)nona-1,2-dien-4-ol (1.2021 g, 5.0 mmol), DMAP (1.3441 g, 11.0 mmol), and benzyl chloroformate (0.86 mL,  $d = 1.212 \text{ g/mL}$ , 1.0423 g, 6.0 mmol) in DCM (5 mL) afforded **1j** (1.2188 g, 65%) (eluent: petroleum ether / diethyl ether / triethylamine = 1000/1/1 to 1000/9/1). It should be noted that the column packed with silica gel was eluted with a mixture of petroleum ether (200 mL) and triethylamine (0.8 mL) before loading the sample) as a liquid:  $^1\text{H}$  NMR (400 MHz,  $\text{CDCl}_3$ )  $\delta$  7.43 – 7.30 (m, 5H, ArH), 5.23 (q,  $J$  = 6.8 Hz, 1H, =CH), 5.16 (s, 2H,  $\text{CH}_2$ ), 5.14 – 5.06 (m, 1H, CH), 4.90 – 4.78 (m, 2H, = $\text{CH}_2$ ), 4.60 – 4.54 (m, 1H, CH), 3.92 – 3.80 (m, 1H, one proton of  $\text{OCH}_2$ ), 3.72 (dt,  $J$  = 12.3 Hz, 4.8 Hz, 1H, one proton of  $\text{OCH}_2$ ), 3.56 – 3.44 (m, 1H, one proton of  $\text{OCH}_2$ ), 3.37 (dt,  $J$  = 11.7 Hz, 4.9 Hz, 1H, one proton of  $\text{OCH}_2$ ), 1.90 – 1.32 (m, 14H,  $7 \times \text{CH}_2$ );  $^{13}\text{C}$  NMR (100 MHz,  $\text{CDCl}_3$ )  $\delta$  208.5, 154.6, 135.2, 128.53, 128.45, 128.3, 98.8, 90.3, 77.4, 76.2, 69.5, 67.4, 62.3, 34.1, 30.7, 29.5, 25.9, 25.4, 25.0, 19.7; IR (neat,  $\text{cm}^{-1}$ ): 3034, 2940, 2864, 2793, 1958, 1741, 1498, 1455, 1384, 1352, 1322, 1248, 1201, 1120, 1077, 1025; MS (ESI)  $m/z$

397 (M+Na)<sup>+</sup>; HRMS (EI) Calcd for C<sub>22</sub>H<sub>30</sub>O<sub>5</sub> (M<sup>+</sup>): 374.2093, Found: 374.2092.

## 7. Synthesis of benzyl 1-(benzyloxy)penta-3,4-dien-2-yl carbonate (**1k**, zth-5-099)

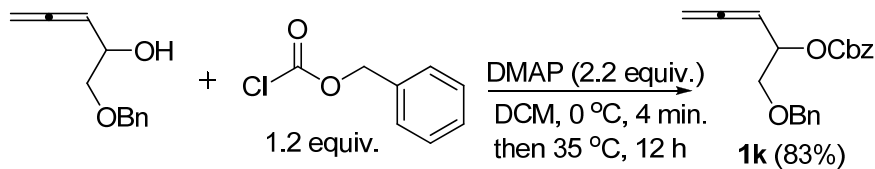

According to **Typical Procedure I**, the reaction of 1-(benzyloxy)penta-3,4-dien-2-ol (0.9517 g, 5.0 mmol), DMAP (1.3451 g, 11.0 mmol), and benzyl chloroformate (0.90 mL, d = 1.212 g/mL, 1.0908 g, 6.0 mmol) in DCM (5 mL) afforded **1k** (1.3525 g, 83%) (eluent: petroleum ether / diethyl ether / triethylamine = 1000/1/1 to 1000/4/1). It should be noted that the column packed with silica gel was eluted with a mixture of petroleum ether (200 mL) and triethylamine (0.8 mL) before loading the sample) as a liquid: <sup>1</sup>H NMR (400 MHz, toluene-*d*<sub>8</sub>) δ 7.24 – 6.94 (m, 10H, ArH), 5.54 – 5.44 (m, 1H, CH), 5.17 (q, *J* = 6.9 Hz, 1H, =CH), 4.91 (s, 2H, CH<sub>2</sub>), 4.64 – 4.48 (m, 2H, =CH<sub>2</sub>), 4.27 (d, *J* = 12.4 Hz, 1H, one proton of OCH<sub>2</sub>Ph), 4.24 (d, *J* = 12.4 Hz, 1H, one proton of OCH<sub>2</sub>Ph), 3.46 (dd, *J* = 10.4, 6.8 Hz, 1H, one proton of CH<sub>2</sub>), 3.38 (dd, *J* = 11.2, 4.4 Hz, 1H, one proton of CH<sub>2</sub>); <sup>13</sup>C NMR (100MHz, CDCl<sub>3</sub>) δ 208.7, 154.4, 137.7, 135.1, 128.44, 128.37, 128.3, 128.2, 127.6, 127.5, 87.4, 77.7, 74.3, 73.1, 70.9, 69.5; IR (neat, cm<sup>-1</sup>): 3089, 3065, 3033, 3008, 2947, 2898, 2863, 1958, 1744, 1606, 1587, 1497, 1455, 1384, 1248, 1104, 1029; MS (ESI) *m/z* 347 (M+Na)<sup>+</sup>; HRMS (EI) Calcd for C<sub>20</sub>H<sub>20</sub>O<sub>4</sub> (M<sup>+</sup>): 324.1362, Found: 324.1360.

## 8. Synthesis of benzyl 1-(benzyloxy)penta-3,4-dien-2-yl carbonate (**1l**, zth-5-044)

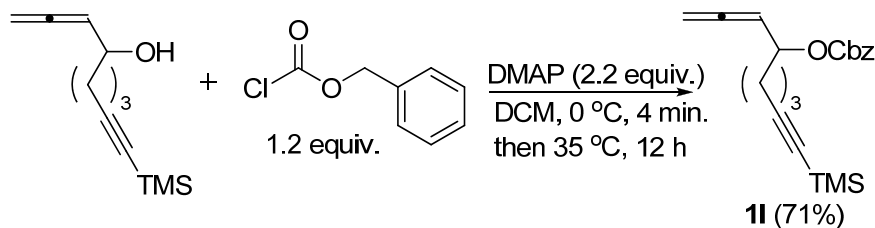

According to **Typical Procedure I**, the reaction of





chromatography on silica gel (eluent: petroleum ether / diethyl ether / triethylamine = 1000/1/1. It should be noted that the column packed with silica gel was eluted with a mixture of petroleum ether (200 mL) and triethylamine (0.8 mL) before loading the sample) afforded **1d** (1.6103 g, 67%) as a liquid:  $^1\text{H}$  NMR (400 MHz,  $\text{CDCl}_3$ ) 5.22 (q,  $J = 6.7$  Hz, 1H, =CH), 5.08 – 4.98 (m, 1H, CH), 4.92 – 4.80 (m, 2H, =CH<sub>2</sub>), 1.80 – 1.58 (m, 2H, CH<sub>2</sub>), 1.49 (s, 9H, C(CH<sub>3</sub>)<sub>3</sub>), 1.44 – 1.23 (m, 6H, 3 × CH<sub>2</sub>), 0.89 (t,  $J = 6.8$  Hz, 3H, CH<sub>3</sub>);  $^{13}\text{C}$  NMR (100 MHz,  $\text{CDCl}_3$ )  $\delta$  208.4, 153.0, 90.7, 81.9, 77.2, 74.9, 34.2, 31.4, 27.8, 24.9, 22.5, 14.0; IR (neat,  $\text{cm}^{-1}$ ): 2955, 2932, 2861, 1959, 1739, 1459, 1435, 1393, 1275, 1251, 1166, 1086; MS (ESI)  $m/z$  263 ( $\text{M}+\text{Na}$ )<sup>+</sup>; HRMS (ESI) Calcd for  $\text{C}_{14}\text{H}_{28}\text{NO}_3$  ( $\text{M}+\text{NH}_4$ )<sup>+</sup>: 258.2064, Found: 258.2064.

**10. Synthesis of *tert*-butyl 1-(4-fluorophenyl)buta-2,3-dienyl carbonate (**1n**, zth-5-091):**

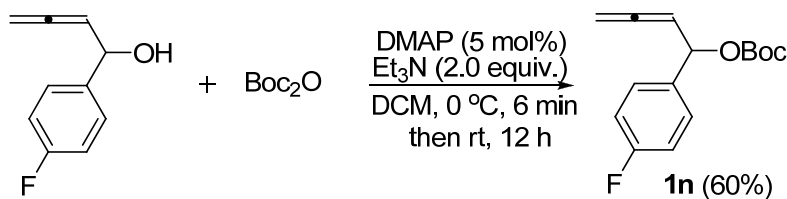

**Typical Procedure III:** DMAP (31.0 mg, 0.25 mmol), 1-(4-fluorophenyl)buta-2,3-dien-1-ol (0.8212 g, 5.0 mmol), triethylamine (1.4 mL,  $d = 0.726$ , 1.0164 g, 10.0 mmol), and DCM (5 mL) were added sequentially into a flask under Argon. Then  $\text{Boc}_2\text{O}$  (1.2 mL,  $d = 0.949$  g/mL, 1.1388 g, 5.0 mmol) was added dropwise within 6 min at 0 °C. Then, the resulting mixture was allowed to stir at rt for 1 hour as monitored by TLC. Upon completion, water (50 mL) and DCM (50 mL) were added and the organic phase was separated. The aqueous phase was extracted with DCM (30 mL × 3). The combined organic phase was washed with brine and dried over anhydrous  $\text{Na}_2\text{SO}_4$ . After complete evaporation the silica gel loaded with the crude product was submitted to column chromatography on silica gel (eluent: petroleum ether / diethyl ether / triethylamine = 1000/1/1 to 1000/3/1). It should be noted that the column packed with silica gel was eluted with a mixture of petroleum ether (200 mL) and triethylamine (0.8 mL) before loading the sample) afforded **1n**

(915.9 mg, 60%) as a liquid:  $^1\text{H}$  NMR (400 MHz,  $\text{CDCl}_3$ )  $\delta$  7.41 – 7.34 (m, 2H, ArH), 7.08 – 7.00 (m, 2H, ArH), 6.04 (dt,  $J = 3.2$  Hz, 2.2 Hz, 1H, CH), 5.44 (q,  $J = 6.7$  Hz, 1H, =CH), 4.94 – 4.80 (m, 2H, =CH<sub>2</sub>), 1.47 (s, 9H, C(CH<sub>3</sub>)<sub>3</sub>);  $^{13}\text{C}$  NMR (100 MHz,  $\text{CDCl}_3$ )  $\delta$  208.5, 162.5 (d,  $J_{\text{C-F}} = 245.5$  Hz), 152.5, 134.7 (d,  $J_{\text{C-F}} = 2.9$  Hz), 128.6 (d,  $J_{\text{C-F}} = 8.6$  Hz), 115.2 (d,  $J_{\text{C-F}} = 22.3$  Hz), 91.4, 82.4, 77.9, 75.7, 27.6;  $^{19}\text{F}$  NMR (376 MHz,  $\text{CDCl}_3$ )  $\delta = -114.1$ ; IR (neat,  $\text{cm}^{-1}$ ): 1958, 1739, 1606, 1510, 1370, 1273, 1252, 1226, 1155, 1126, 1081, 1035, 1015, 1004; MS (70 eV, EI)  $m/z$  (%) 264 ( $\text{M}^+$ , 1.05), 57 (100); HRMS (EI) Calcd for  $\text{C}_{15}\text{H}_{17}\text{FO}_3$  ( $\text{M}^+$ ): 264.1162, Found: 264.1159.

**11. Synthesis of *tert*-butyl 1-(3-bromophenyl)buta-2,3-dienyl carbonate (**1o**, zth-4-118):**

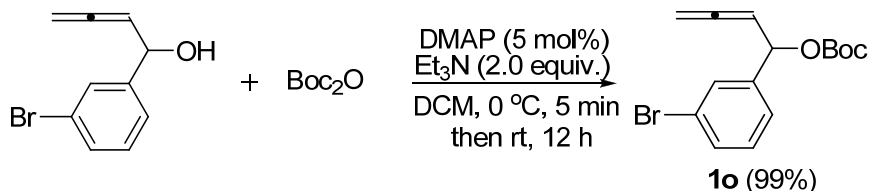

According to **Typical Procedure III**, the reaction of 1-(3-bromophenyl)buta-2,3-dien-1-ol (1.1263 g, 5.0 mmol), DMAP (30.7 mg, 0.25 mmol), triethylamine (1.4 mL, d = 0.726, 1.0164 g, 10.0 mmol), and  $\text{Boc}_2\text{O}$  (1.2 mL, d = 0.949 g/mL, 1.1388 g, 5.0 mmol) in DCM (5 mL) afforded **1o** (1.6158 g, 99%) (eluent: petroleum ether / diethyl ether / triethylamine = 1000/4/1). It should be noted that the column packed with silica gel was eluted with a mixture of petroleum ether (200 mL) and triethylamine (0.8 mL) before loading the sample) as a liquid:  $^1\text{H}$  NMR (400 MHz,  $\text{CDCl}_3$ )  $\delta$  7.54 (t,  $J = 1.6$  Hz, 1H, ArH), 7.44 (dt,  $J = 8.0$  Hz, 1.6 Hz, 1H, ArH), 7.34 – 7.28 (m, 1H, ArH), 7.23 (t,  $J = 7.6$  Hz, 1H, ArH), 6.01 (dt,  $J = 7.0$  Hz, 1.8 Hz, 1H, CH), 5.41 (q,  $J = 6.8$  Hz, 1H, =CH), 4.96 – 4.84 (m, 2H, =CH<sub>2</sub>), 1.49 (s, 9H, C(CH<sub>3</sub>)<sub>3</sub>);  $^{13}\text{C}$  NMR (100 MHz,  $\text{CDCl}_3$ )  $\delta$  208.7, 152.4, 141.2, 131.3, 130.0, 129.8, 125.4, 122.5, 91.2, 82.8, 78.2, 75.6, 27.7; IR (neat,  $\text{cm}^{-1}$ ): 3067, 2981, 2935, 2873, 1957, 1739, 1596, 1572, 1475, 1430, 1369, 1272, 1251, 1156, 1126, 1075, 1035; MS (ESI)  $m/z$  349 [ $\text{M}(^{81}\text{Br}) + \text{Na}^+$ ], 347 [ $\text{M}(^{79}\text{Br}) + \text{Na}^+$ ]; HRMS (EI) Calcd for  $\text{C}_{15}\text{H}_{17}\text{O}_3^{79}\text{Br}$  ( $\text{M}^+$ ): 324.0361, Found: 324.0352.

12. Synthesis of *tert*-butyl 1-(4-bromophenyl)buta-2,3-dienyl carbonate (**1p**, zth-4-106):

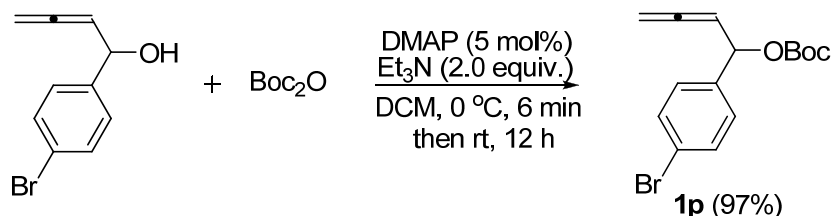

According to **Typical Procedure III**, the reaction of 1-(4-bromophenyl)buta-2,3-dien-1-ol (1.1259 g, 5.0 mmol), DMAP (30.7 mg, 0.25 mmol), triethylamine (1.4 mL, d = 0.726, 1.0164 g, 10.0 mmol), and Boc<sub>2</sub>O (1.2 mL, d = 0.949 g/mL, 1.1388 g, 5.0 mmol) in DCM (5 mL) afforded **1p** (1.5735 g, 97%) (eluent: petroleum ether / diethyl ether / triethylamine = 1000/4/1). It should be noted that the column packed with silica gel was eluted with a mixture of petroleum ether (200 mL) and triethylamine (0.8 mL) before loading the sample) as a liquid: <sup>1</sup>H NMR (400 MHz, CDCl<sub>3</sub>) δ 7.49 (dt, *J* = 8.4 Hz, 2.0 Hz, 2H, ArH), 7.26 (dt, *J* = 8.8 Hz, 2.2 Hz, 2H, ArH), 6.01 (dt, *J* = 6.4 Hz, 2.2 Hz, 1H, CH), 5.42 (q, *J* = 6.7 Hz, 1H, =CH), 4.94 – 4.81 (m, 2H, =CH<sub>2</sub>), 1.47 (s, 9H, C(CH<sub>3</sub>)<sub>3</sub>); <sup>13</sup>C NMR (100 MHz, CDCl<sub>3</sub>) δ 208.7, 152.5, 138.0, 131.6, 128.5, 122.2, 91.2, 82.7, 78.1, 75.8, 27.7; IR (neat, cm<sup>-1</sup>): 2981, 2934, 1958, 1740, 1595, 1488, 1458, 1434, 1395, 1369, 1273, 1252, 1159, 1126, 1072, 1036, 1012; MS (ESI) *m/z* 344 [M(<sup>81</sup>Br)+NH<sub>4</sub>]<sup>+</sup>, 342 [M(<sup>79</sup>Br)+NH<sub>4</sub>]<sup>+</sup>; HRMS (ESI) Calcd for C<sub>15</sub>H<sub>21</sub><sup>79</sup>BrNO<sub>3</sub> (M+NH<sub>4</sub>)<sup>+</sup>: 342.0699, Found: 342.0699.

13. Synthesis of *tert*-butyl 1-(4-methoxycarbonylphenyl)buta-2,3-dienyl carbonate (**1q**, zth-4-120):

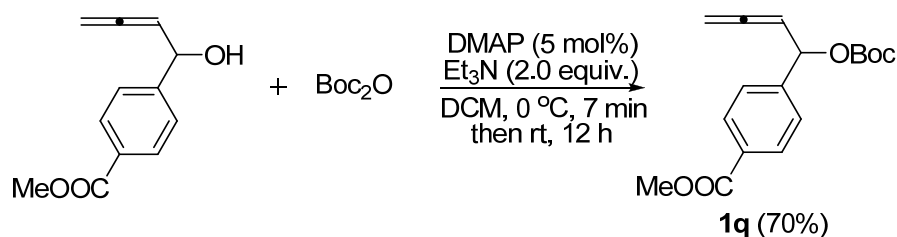

According to **Typical Procedure III**, the reaction of 1-(4-methoxycarbonyl

phenyl)buta-2,3-dien-1-ol (1.0223 g, 5.0 mmol), DMAP (30.7 mg, 0.25 mmol), triethylamine (1.4 mL, d = 0.726, 1.0164 g, 10.0 mmol), and Boc<sub>2</sub>O (1.2 mL, d = 0.949 g/mL, 1.1388 g, 5.0 mmol) in DCM (5 mL) afforded **1q** (1.0587 g, 70%) (eluent: petroleum ether / diethyl ether / triethylamine = 1000/4/1 to 1000/9/1). It should be noted that the column packed with silica gel was eluted with a mixture of petroleum ether (200 mL) and triethylamine (0.8 mL) before loading the sample) as a liquid: <sup>1</sup>H NMR (400 MHz, CDCl<sub>3</sub>) δ 8.03 (dt, *J* = 8.0 Hz, 1.8 Hz, 2H, ArH), 7.26 (d, *J* = 8.0 Hz, 2H, ArH), 6.10 (dt, *J* = 6.8 Hz, 2.0 Hz, 1H, CH), 5.44 (q, *J* = 6.8 Hz, 1H, =CH), 4.93 – 4.81 (m, 2H, =CH<sub>2</sub>), 3.92 (s, 3H, CH<sub>3</sub>), 1.48 (s, 9H, C(CH<sub>3</sub>)<sub>3</sub>); <sup>13</sup>C NMR (100 MHz, CDCl<sub>3</sub>) δ 208.8, 166.6, 152.4, 143.9, 129.8, 129.7, 126.5, 91.1, 82.7, 78.0, 75.9, 52.1, 27.6; IR (neat, cm<sup>-1</sup>): 1958, 1741, 1725, 1614, 1436, 1370, 1274, 1254, 1161, 1110, 1020; MS (ESI) *m/z* 327 (M+Na)<sup>+</sup>; HRMS (ESI) Calcd for C<sub>17</sub>H<sub>24</sub>NO<sub>5</sub> (M+NH<sub>4</sub>)<sup>+</sup>: 322.1649, Found: 322.1652.

**14. Synthesis of *tert*-butyl 1-(3-cyanophenyl)buta-2,3-dienyl carbonate (**1r**, **zth-4-121**):**

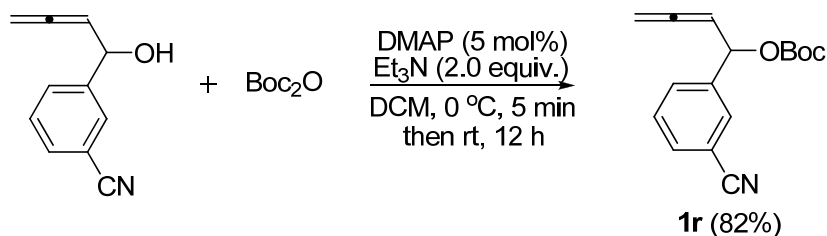

According to **Typical Procedure III**, the reaction of 1-(3-cyanophenyl)buta-2,3-dien-1-ol (0.8566 g, 5.0 mmol), DMAP (30.7 mg, 0.25 mmol), triethylamine (1.4 mL, d = 0.726, 1.0164 g, 10.0 mmol), and Boc<sub>2</sub>O (1.2 mL, d = 0.949 g/mL, 1.1388 g, 5.0 mmol) in DCM (5 mL) afforded **1r** (1.1176 g, 82%) (eluent: petroleum ether / diethyl ether / triethylamine = 1000/4/1 to 1000/9/1). It should be noted that the column packed with silica gel was eluted with a mixture of petroleum ether (200 mL) and triethylamine (0.8 mL) before loading the sample) as a liquid: <sup>1</sup>H NMR (400 MHz, CDCl<sub>3</sub>) δ 7.69 (s, 1H, ArH), 7.64 – 7.58 (m, 2H, ArH), 7.48 (t, *J* = 7.6 Hz, 1H, ArH), 6.07 (dt, *J* = 6.8 Hz, 2.2 Hz, 1H, CH), 5.43 (q, *J* = 6.7

Hz, 1H, =CH), 4.96 – 4.83 (m, 2H, =CH<sub>2</sub>), 1.49 (s, 9H, C(CH<sub>3</sub>)<sub>3</sub>); <sup>13</sup>C NMR (100 MHz, CDCl<sub>3</sub>) δ 208.9, 152.3, 140.5, 131.8, 131.1, 130.3, 129.3, 118.6, 112.6, 90.9, 83.1, 78.5, 75.2, 27.7; IR (neat, cm<sup>-1</sup>): 3069, 2982, 2935, 2232, 1958, 1740, 1605, 1586, 1482, 1460, 1435, 1395, 1370, 1353, 1272, 1251, 1156, 1126, 1082, 1036; MS (ESI) m/z 272 (M+H)<sup>+</sup>; HRMS (EI) Calcd for C<sub>16</sub>H<sub>17</sub>NO<sub>3</sub> (M<sup>+</sup>): 271.1208, Found: 271.1214.

#### 15. Synthesis of *tert*-butyl dodeca-1,2-dien-5-yn-4-yl carbonate (**1s**, zth-5-089):

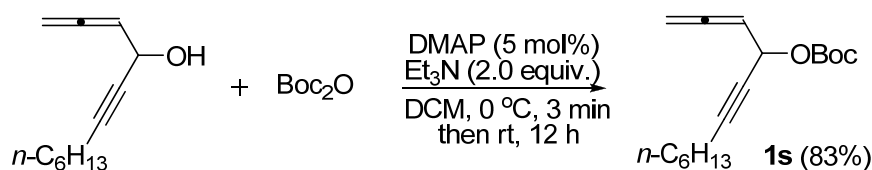

According to **Typical Procedure III**, the reaction of dodeca-1,2-dien-5-yn-4-ol (0.8917 g, 5.0 mmol), DMAP (30.7 mg, 0.25 mmol), triethylamine (1.4 mL, d = 0.726, 1.0164 g, 10.0 mmol), and Boc<sub>2</sub>O (1.2 mL, d = 0.949 g/mL, 1.1388 g, 5.0 mmol) in DCM (5 mL) afforded **1s** (1.1494 g, 83%) (eluent: petroleum ether / diethyl ether / triethylamine = 1000/1/1 to 1000/3/1). It should be noted that the column packed with silica gel was eluted with a mixture of petroleum ether (200 mL) and triethylamine (0.8 mL) before loading the sample) as a liquid: <sup>1</sup>H NMR (400 MHz, CDCl<sub>3</sub>) δ 5.71 – 5.64 (m, 1H, CH), 5.36 (q, *J* = 6.7 Hz, 1H, =CH), 5.01 – 4.91 (m, 2H, =CH<sub>2</sub>), 2.22 (td, *J* = 7.2 Hz, 2.0 Hz, 2H, CH<sub>2</sub>), 1.54 – 1.44 (m, 11H, C(CH<sub>3</sub>)<sub>3</sub>+CH<sub>2</sub>), 1.42 – 1.22 (m, 6H, 3×CH<sub>2</sub>), 0.89 (t, *J* = 7.0 Hz, 3H, CH<sub>3</sub>); <sup>13</sup>C NMR (100 MHz, CDCl<sub>3</sub>) δ 209.0, 152.2, 89.8, 87.9, 82.4, 78.2, 75.5, 65.4, 31.2, 28.3, 28.2, 27.6, 22.4, 18.6, 13.9; IR (neat, cm<sup>-1</sup>): 3069, 2932, 2860, 2239, 1959, 1743, 1459, 1433, 1370, 1351, 1321, 1272, 1251, 1157, 1117, 1077, 1035; MS (ESI) m/z 301 (M+Na)<sup>+</sup>; HRMS (ESI) Calcd for C<sub>17</sub>H<sub>30</sub>NO<sub>3</sub> (M+NH<sub>4</sub>)<sup>+</sup>: 296.2220, Found: 296.2219.

### Synthesis of 3,4-alkadienyl ketones (Table 4)

#### 1. Synthesis of 1-phenyl-3-(propa-1,2-dienyl)octan-1-one (**3aa**, zth-3-157)

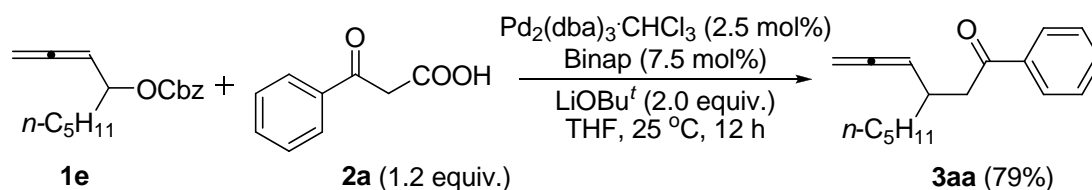

To an oven-dried Schlenk tube was added LiOBu<sup>t</sup> (160.3 mg, 2.0 mmol) under argon. Then to the Schlenk tube equipped with a magnetic stirring bar were added sequentially **1e** (274.4 mg, 1.0 mmol)/THF (3 mL), Pd<sub>2</sub>(dba)<sub>3</sub>·CHCl<sub>3</sub> (25.8 mg, 0.025 mmol), binap (47.7 mg, 0.075 mmol), and **2a** (197.3 mg, 1.2 mmol)/THF (2 mL) under argon. The resulting mixture was stirred at 25 °C for 12 hours. Upon completion, the resulting mixture was filtered through a short column of silica gel eluted with Et<sub>2</sub>O (20 mL) and concentrated. The crude product was purified by column chromatography on silica gel (eluent: petroleum ether / ethyl acetate = 500/1) to afford **3aa** (191.9 mg, 79%) as a liquid: <sup>1</sup>H NMR (400 MHz, CDCl<sub>3</sub>) δ 7.95 (d, *J* = 7.2 Hz, 2H, ArH), 7.55 (t, *J* = 7.6 Hz, 1H, ArH), 7.45 (t, *J* = 7.4 Hz, 2H, ArH), 5.18 (q, *J* = 6.7 Hz, 1H, =CH), 4.72 – 4.62 (m, 2H, =CH<sub>2</sub>), 3.09 (dd, *J* = 16.6 Hz, 7.4 Hz, 1H, one proton of CH<sub>2</sub>), 2.95 (dd, *J* = 16.6 Hz, 6.2 Hz, 1H, one proton of CH<sub>2</sub>), 2.86 – 2.74 (m, 1H, CH), 1.54 – 1.20 (m, 8H, 4 × CH<sub>2</sub>), 0.88 (t, *J* = 6.8 Hz, 3H, CH<sub>3</sub>); <sup>13</sup>C NMR (100 MHz, CDCl<sub>3</sub>) δ 207.6, 199.3, 137.4, 132.8, 128.5, 128.0, 93.8, 76.2, 43.6, 35.0, 34.0, 31.8, 26.7, 22.6, 14.0; IR (neat, cm<sup>-1</sup>): 2955, 2927, 2856, 1954, 1685, 1597, 1580, 1448, 1406, 1357, 1274, 1210, 1179, 1001; MS (70 eV, EI) *m/z* (%) 242 (M<sup>+</sup>, 1.23), 105 (100); HRMS (EI) calcd for C<sub>17</sub>H<sub>22</sub>O (M<sup>+</sup>): 242.1671, found 242.1672.

## 2. Synthesis of 1-phenyl-3-(propa-1,2-dienyl)nonan-1-one (**3fa**, zth-3-158)

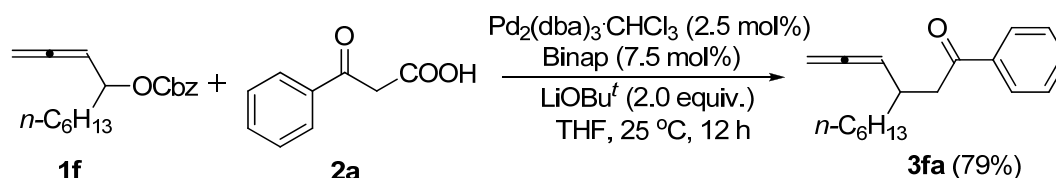

To an oven-dried Schlenk tube was added LiOBu<sup>t</sup> (160.4 mg, 2.0 mmol) under argon. Then to the Schlenk tube equipped with a magnetic stirring bar were added sequentially Pd<sub>2</sub>(dba)<sub>3</sub>·CHCl<sub>3</sub> (25.8 mg, 0.025 mmol), binap (47.7 mg, 0.075 mmol), **1f** (288.5 mg, 1.0 mmol)/THF (3 mL), and **2a** (197.4 mg, 1.2 mmol)/THF (2 mL)

under argon. The mixture was stirred at 25 °C for 12 hours. Upon completion, the resulting mixture was filtered through a short column of silica gel eluted with Et<sub>2</sub>O (20 mL) and concentrated. The crude product was purified by chromatography on silica gel (eluent: petroleum ether / ethyl acetate = 500/1) to afford **3fa** (202.1 mg, 79%) as a liquid: <sup>1</sup>H NMR (400 MHz, CDCl<sub>3</sub>) δ 7.98 – 7.90 (m, 2H, ArH), 7.55 (t, *J* = 7.4 Hz, 1H, ArH), 7.45 (t, *J* = 7.6 Hz, 2H, ArH), 5.18 (q, *J* = 6.5 Hz, 1H, =CH), 4.71 – 4.61 (m, 2H, =CH<sub>2</sub>), 3.09 (dd, *J* = 16.6 Hz, 7.4 Hz, 1H, one proton of CH<sub>2</sub>), 2.95 (dd, *J* = 16.4, 6.0 Hz, 1H, one proton of CH<sub>2</sub>), 2.86 – 2.74 (m, 1H, CH), 1.54 – 1.18 (m, 10H, 5 × CH<sub>2</sub>), 0.88 (t, *J* = 6.6 Hz, 3H, CH<sub>3</sub>); <sup>13</sup>C NMR (100 MHz, CDCl<sub>3</sub>) δ 207.6, 199.4, 137.4, 132.8, 128.5, 128.0, 93.8, 76.2, 43.6, 35.1, 34.0, 31.8, 29.3, 27.0, 22.6, 14.0; IR (neat, cm<sup>-1</sup>): 2955, 2925, 2855, 1955, 1685, 1598, 1580, 1448, 1406, 1358, 1279, 1266, 1208, 1179, 1001; MS (70 eV, EI) *m/z* (%) 256 (M<sup>+</sup>, 1.59), 105 (100); HRMS calcd for C<sub>18</sub>H<sub>24</sub>O (M<sup>+</sup>): 256.1827, found 256.1831.

**The gram scale synthesis of 1-phenyl-3-(propa-1,2-dienyl)nonan-1-one (**3fa**, zth-5-146)**

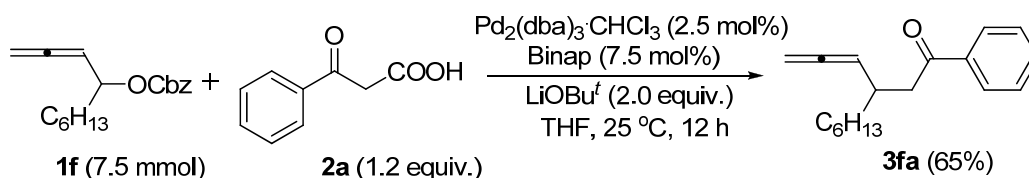

To an oven-dried Schlenk tube was added LiOBu<sup>t</sup> (1.2013 g, 15.0 mmol) under argon. Then, to the Schlenk tube equipped with a magnetic stirring bar were added sequentially Pd<sub>2</sub>(dba)<sub>3</sub>·CHCl<sub>3</sub> (194.4 mg, 0.1875 mmol), binap (350.5 mg, 0.5625 mmol), **2a** (1477.0 mg, 1.2 mmol), and **1f** (2163.2 mg, 7.5 mmol), and THF (37.5 mL) under argon. The mixture was stirred at 25 °C for 12 hours. Upon completion, the resulting mixture was filtered through a short column of silica gel eluting with Et<sub>2</sub>O (150 mL) and concentrated. The crude product was purified by chromatography on silica gel (eluent: petroleum ether / ethyl acetate = 500/1) to afford **3fa** (1.2580 g, 65%) as a liquid: <sup>1</sup>H NMR (400 MHz, CDCl<sub>3</sub>) δ 8.00 – 7.90 (m, 2H, ArH), 7.60 - 7.52 (m, 1H, ArH), 7.46 (t, *J* = 7.6 Hz, 2H, ArH), 5.18 (q, *J* = 6.9 Hz, 1H, =CH), 4.72 – 4.60 (m, 2H, =CH<sub>2</sub>), 3.09 (dd, *J* = 16.4, 7.6 Hz, 1H, one proton of CH<sub>2</sub>), 2.95 (dd, *J* =

16.6 Hz, 6.2 Hz, 1H, one proton of CH<sub>2</sub>), 2.86 – 2.74 (m, 1H, CH), 1.54 – 1.20 (m, 10H, 5 × CH<sub>2</sub>), 0.88 (t, *J* = 6.8 Hz, 3H, CH<sub>3</sub>); <sup>13</sup>C NMR (100 MHz, CDCl<sub>3</sub>) δ 207.6, 199.4, 137.3, 132.9, 128.5, 128.0, 93.8, 76.2, 43.6, 35.1, 34.0, 31.8, 29.3, 27.0, 22.6, 14.1.

### 3. Synthesis of 1-(4-bromophenyl)hexa-4,5-dien-1-one (**3gb**, zth-5-060)

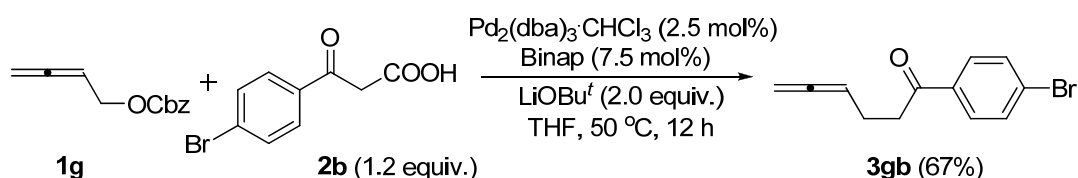

**Typical Procedure IV:** To an oven-dried Schlenk tube was added LiOBu<sup>t</sup> (160.7 mg, 2.0 mmol) under argon. Then to the Schlenk tube equipped with a magnetic stirring bar were added sequentially Pd<sub>2</sub>(dba)<sub>3</sub>·CHCl<sub>3</sub> (26.0 mg, 0.025 mmol), binap (47.6 mg, 0.075 mmol), **2b** (291.9 mg, 1.2 mmol), **1g** (204.3 mg, 1.0 mmol), and THF (5 mL) under argon. The resulting mixture was stirred at 25 °C for 12 hours. Upon completion, the resulting mixture was filtered through a short column of silica gel eluting with Et<sub>2</sub>O (50 mL) and concentrated. The crude product was purified by chromatography on silica gel (eluent: petroleum ether / ethyl acetate = 500/1) to afford **3gb** (168.3 mg, 67%) as a liquid: <sup>1</sup>H NMR (400 MHz, CDCl<sub>3</sub>) δ 7.83 (d, *J* = 8.4 Hz, 2H, ArH), 7.60 (d, *J* = 8.8 Hz, 2H, ArH), 5.25 (quintet, *J* = 6.5 Hz, 1H, =CH), 4.70 (quintet, *J* = 3.4 Hz, 2H, =CH<sub>2</sub>), 3.07 (t, *J* = 7.0 Hz, 2H, CH<sub>2</sub>), 2.50 – 2.35 (m, 2H, CH<sub>2</sub>); <sup>13</sup>C NMR (100 MHz, CDCl<sub>3</sub>) δ = 208.3, 198.3, 135.6, 131.9, 129.5, 128.1, 89.1, 79.2, 37.3, 22.1; IR (neat, cm<sup>-1</sup>): 2959, 2914, 2858, 1955, 1674, 1584, 1567, 1468, 1447, 1420, 1396, 1361, 1340, 1294, 1263, 1198, 1179, 1070, 1060, 1036, 1011; MS (70 eV, EI) *m/z* (%) 252 [M(<sup>81</sup>Br)<sup>+</sup>, 24.38], 250 [M(<sup>79</sup>Br)<sup>+</sup>, 24.00], 183 (100); HRMS calcd for C<sub>12</sub>H<sub>11</sub><sup>79</sup>BrO (M<sup>+</sup>): 249.9993, found 249.9995.

### 4. Synthesis of 1-(4-chlorophenyl)-3-phenethylhexa-4,5-dien-1-one (**3hc**, zth-5-050)



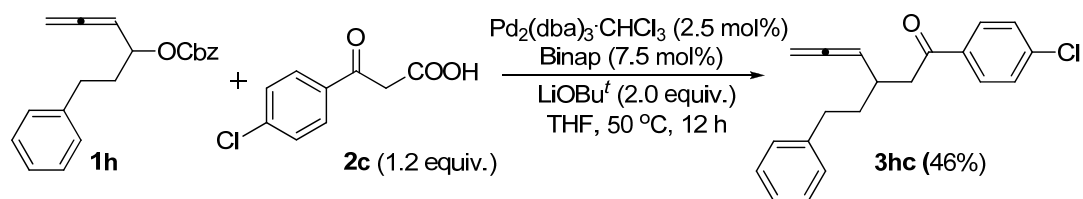

According to **Typical Procedure IV**, the reaction of **1h** (308.5 mg, 1.0 mmol), **2c** (239.0 mg, 1.2 mmol),  $\text{Pd}_2(\text{dba})_3 \cdot \text{CHCl}_3$  (25.9 mg, 0.025 mmol), binap (47.8 mg, 0.075 mmol), and  $\text{LiOBu}^t$  (160.4 mg, 2.0 mmol) in THF (5 mL) at 50 °C afforded **3hc** (153.7 mg, 46%, purity = 93%) (eluent : petroleum ether / ethyl ether = 1000/1) as a liquid:  $^1\text{H}$  NMR (400 MHz,  $\text{CDCl}_3$ )  $\delta$  7.93 – 7.81 (m, 2H, ArH), 7.48 – 7.39 (m, 2H, ArH), 7.30 – 7.22 (m, 2H, ArH), 7.22 – 7.12 (m, 3H, ArH), 5.23 (q,  $J$  = 6.5 Hz, 1H, =CH), 4.77 - 4.66 (m, 2H, =CH<sub>2</sub>), 3.09 (dd,  $J$  = 16.2 Hz, 7.8 Hz, 1H, one proton of CH<sub>2</sub>), 2.94 (dd,  $J$  = 16.4 Hz, 6.0 Hz, 1H, one proton of CH<sub>2</sub>), 2.90 – 2.80 (m, 1H, CH), 2.80 – 2.58 (m, 2H, CH<sub>2</sub>), 1.86 – 1.69 (m, 2H, CH<sub>2</sub>);  $^{13}\text{C}$  NMR (100 MHz,  $\text{CDCl}_3$ )  $\delta$  207.8, 197.8, 142.0, 139.4, 135.5, 129.4, 128.8, 128.3, 125.8, 93.3, 76.6, 43.6, 36.7, 33.7, 33.4; IR (neat,  $\text{cm}^{-1}$ ): 3085, 3062, 3026, 2924, 2856, 1954, 1684, 1588, 1571, 1496, 1488, 1454, 1400, 1360, 1261, 1251, 1210, 1091, 1030, 1012; MS (ESI)  $m/z$  313  $[\text{M}(^{37}\text{Cl})+\text{H}]^+$ , 311  $[\text{M}(^{35}\text{Cl})+\text{H}]^+$ ; HRMS calcd for  $\text{C}_{20}\text{H}_{19}\text{O}^{35}\text{Cl}(\text{M}^+)$ : 310.1124, found 310.1128.

#### 5. Synthesis of 1-(4-methoxyphenyl)-3-(propa-1,2-dienyl)tridec-12-en-1-one (**3id**, zth-5-022)

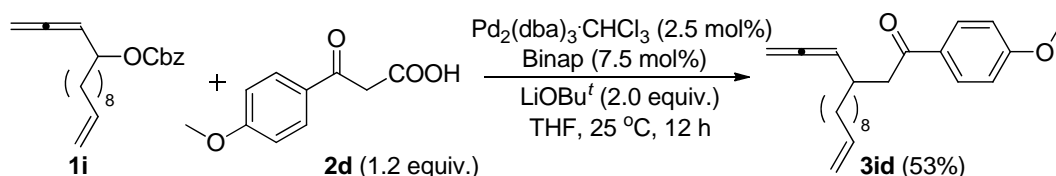

According to **Typical Procedure IV**, the reaction of **1i** (342.5 mg, 1.0 mmol), **2d** (233.4 mg, 1.2 mmol),  $\text{Pd}_2(\text{dba})_3 \cdot \text{CHCl}_3$  (25.9 mg, 0.025 mmol), binap (47.8 mg, 0.075 mmol), and  $\text{LiOBu}^t$  (160.4 mg, 2.0 mmol) in THF (5 mL) afforded **3id** (180.3 mg, 53%) [eluent: petroleum ether / ethyl ether = 1000/1 (4 L) to 500/1 (2 L)] as a liquid:  $^1\text{H}$  NMR (400 MHz,  $\text{CDCl}_3$ )  $\delta$  7.94 (d,  $J$  = 9.2 Hz, 2H, ArH), 6.93 (d,  $J$  = 9.2 Hz, 2H, ArH), 5.86 – 5.75 (m, 1H, =CH), 5.17 (q,  $J$  = 6.8 Hz, 1H, =CH), 5.03 - 4.89

(m, 2H, =CH<sub>2</sub>), 4.71 – 4.61 (m, 2H, =CH<sub>2</sub>), 3.87 (s, 3H, CH<sub>3</sub>), 3.03 (dd,  $J$  = 16.0, 7.6 Hz, 1H, one proton of CH<sub>2</sub>), 2.89 (dd,  $J$  = 16.2, 6.2 Hz, 1H, one proton of CH<sub>2</sub>), 2.81 – 2.71 (m, 1H, CH), 2.03 (q,  $J$  = 7.1 Hz, 2H, CH<sub>2</sub>), 1.50 – 1.20 (m, 14H, 7 × CH<sub>2</sub>); <sup>13</sup>C NMR (100 MHz, CDCl<sub>3</sub>) δ 207.6, 198.0, 163.3, 139.2, 130.5, 130.3, 114.1, 113.6, 93.9, 76.2, 55.4, 43.3, 35.1, 34.2, 33.8, 29.6, 29.5, 29.4, 29.1, 28.9, 27.0; IR (neat, cm<sup>-1</sup>): 2924, 2853, 1955, 1677, 1640, 1600, 1576, 1509, 1462, 1441, 1418, 1359, 1307, 1256, 1168, 1112, 1031; MS(70 eV, EI)  $m/z$  (%) 340 (M<sup>+</sup>, 3.76) 135 (100); HRMS calcd for C<sub>23</sub>H<sub>32</sub>O<sub>2</sub> (M<sup>+</sup>): 340.2402, found 340.2404.

## 6. Synthesis of 1-*p*-tolyl-3-(propa-1,2-dienyl)-8-(tetrahydro-2*H*-pyran-2-yloxy)-octan-1-one (**3je**, zth-5-104)

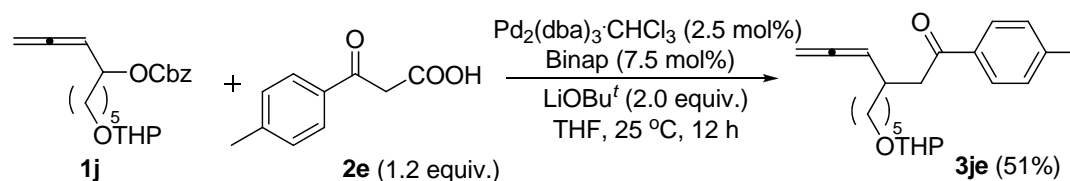

According to **Typical Procedure IV**, the reaction of **1j** (374.5 mg, 1.0 mmol), **2e** (214.1 mg, 1.2 mmol), Pd<sub>2</sub>(dba)<sub>3</sub>·CHCl<sub>3</sub> (25.9 mg, 0.025 mmol), binap (47.8 mg, 0.075 mmol), and LiOBu<sup>t</sup> (160.7 mg, 2.0 mmol) in THF (5 mL) afforded **3je** (181.8 mg, 51%) [eluent: petroleum ether / ethyl acetate = 1000/1 (1 L) to 500/1 (4 L) to 250/1 for the first round afforded impure **3je**, which was further purified by eluent: petroleum ether / ethyl acetate = 100/1 (1 L) to 50/1 (3 L) to 20/1 (1 L) for the second round] as a liquid: <sup>1</sup>H NMR (400 MHz, CDCl<sub>3</sub>) δ 7.85 (d,  $J$  = 8.0 Hz, 2H, ArH), 7.25 (d,  $J$  = 8.8 Hz, 2H, ArH), 5.17 (q,  $J$  = 6.7 Hz, 1H, =CH), 4.71 – 4.61 (m, 2H, =CH<sub>2</sub>), 4.59 – 4.54 (m, 1H, CH), 3.91 – 3.80 (m, 1H, one proton of OCH<sub>2</sub>), 3.72 (dt,  $J$  = 9.6 Hz, 4.6 Hz, 1H, one proton of OCH<sub>2</sub>), 3.54 – 3.44 (m, 1H, one proton of OCH<sub>2</sub>), 3.37 (dt,  $J$  = 9.6, 5.0 Hz, 1H, one proton of OCH<sub>2</sub>), 3.06 (dd,  $J$  = 16.4, 7.6 Hz, 1H, one proton of CH<sub>2</sub>), 2.92 (dd,  $J$  = 16.4, 6.0 Hz, 1H, one proton of CH<sub>2</sub>), 2.84 – 2.72 (m, 1H, CH), 2.41 (s, 3H, CH<sub>3</sub>), 1.88 – 1.64 (m, 2H, CH<sub>2</sub>), 1.64 – 1.30 (m, 12H, 6 × CH<sub>2</sub>); <sup>13</sup>C NMR (100 MHz, CDCl<sub>3</sub>) δ 207.6, 199.0, 143.6, 134.8, 129.2, 128.1, 98.8, 93.7, 76.2, 67.5, 62.3, 43.5, 35.0, 34.0, 30.7, 29.6, 26.9, 26.2, 25.5, 21.6, 19.7; IR (neat,

cm<sup>-1</sup>): 2934, 2857, 1954, 1682, 1606, 1573, 1440, 1407, 1352, 1323, 1282, 1261, 1224, 1201, 1180, 1136, 1119, 1077, 1023; MS (70 eV, EI) *m/z* (%) 356 (M<sup>+</sup>, 1.15), 119 (100); HRMS calcd for C<sub>23</sub>H<sub>32</sub>O<sub>3</sub> (M<sup>+</sup>): 356.2351, found 356.2354.

## 7. Synthesis of 1-*m*-tolyl-3-(benzyloxymethyl)hexa-4,5-dien-1-one (**3kf**, *zth*-5-129)

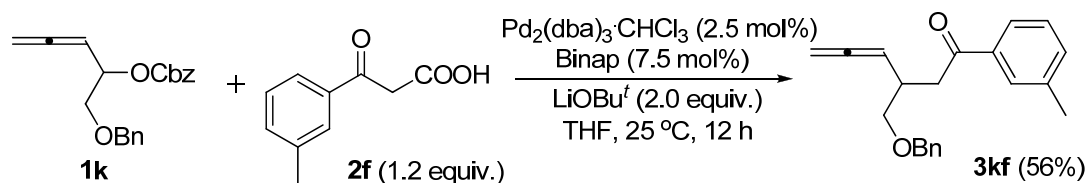

According to **Typical Procedure IV**, the reaction of **1k** (324.5 mg, 1.0 mmol), **2f** (214.0 mg, 1.2 mmol), Pd<sub>2</sub>(dba)<sub>3</sub>·CHCl<sub>3</sub> (25.9 mg, 0.025 mmol), binap (47.8 mg, 0.075 mmol), and LiOBu<sup>t</sup> (160.5 mg, 2.0 mmol) in THF (5 mL) afforded **3kf** (171.7 mg, 56%) [eluent: petroleum ether / ethyl acetate = 1000/1 (5 L) to 500/1 (1 L)] as a liquid: <sup>1</sup>H NMR (400 MHz, CDCl<sub>3</sub>) δ 7.80 – 7.70 (m, 2H, ArH), 7.40 – 7.22 (m, 7H, ArH), 5.29 (q, *J* = 6.4 Hz, 1H, =CH), 4.76 – 4.65 (m, 2H, =CH<sub>2</sub>), 4.51 (s, 2H, CH<sub>2</sub>), 3.56 (dd, *J* = 9.2, 5.2 Hz, 1H, one proton of CH<sub>2</sub>), 3.48 (dd, *J* = 9.2, 6.4 Hz, 1H, one proton of CH<sub>2</sub>), 3.27 – 3.12 (m, 2H, one proton of CH<sub>2</sub>+CH), 3.06 (dd, *J* = 15.8, 6.8 Hz, 1H, one proton of CH<sub>2</sub>), 2.40 (s, 3H, CH<sub>3</sub>); <sup>13</sup>C NMR (100 MHz, CDCl<sub>3</sub>) δ 207.8, 199.2, 138.3, 138.2, 137.2, 133.6, 128.6, 128.33, 128.29, 127.54, 127.51, 125.2, 91.2, 76.8, 72.9, 72.8, 40.2, 34.1, 21.3; IR (neat, cm<sup>-1</sup>): 2854, 1954, 1684, 1596, 1580, 1487, 1448, 1404, 1359, 1245, 1203, 1180, 1072, 1010; MS (ESI) *m/z* 307 (M+H)<sup>+</sup>; HRMS calcd for C<sub>21</sub>H<sub>22</sub>O<sub>2</sub> (M<sup>+</sup>): 306.1620, found 306.1621.

## 8. Synthesis of 1-phenyl-3-(propa-1,2-dienyl)-8-(trimethylsilyl)oct-7-yn-1-one (**3la**, *zth*-5-131)

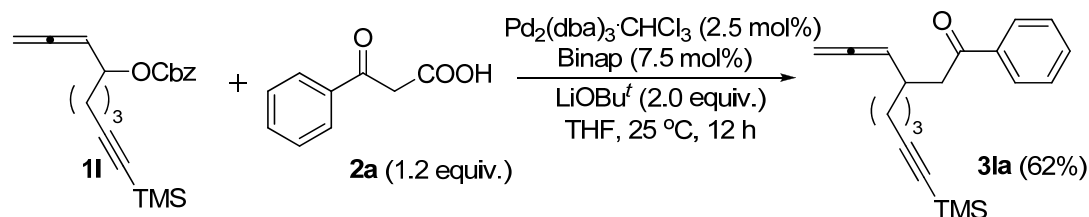

According to **Typical Procedure IV**, the reaction of **1l** (342.6 mg, 1.0 mmol), **2a**

(197.2 mg, 1.2 mmol),  $\text{Pd}_2(\text{dba})_3 \cdot \text{CHCl}_3$  (25.9 mg, 0.025 mmol), binap (47.7 mg, 0.075 mmol), and  $\text{LiOBu}^t$  (160.4 mg, 2.0 mmol) in THF (5 mL) afforded **3la** (198.5 mg, 62%, purity = 97%) (eluent: petroleum ether / ethyl acetate = 1000/1) as a liquid:  $^1\text{H}$  NMR (400 MHz,  $\text{CDCl}_3$ )  $\delta$  7.98 – 7.90 (m, 2H, ArH), 7.60 – 7.52 (m, 1H, ArH), 7.46 (t,  $J$  = 7.6 Hz, 2H, ArH), 5.18 (q,  $J$  = 6.7 Hz, 1H, =CH), 4.74 – 4.62 (m, 2H, =CH<sub>2</sub>), 3.11 (dd,  $J$  = 16.8, 7.6 Hz, 1H, one proton of CH<sub>2</sub>), 2.96 (dd,  $J$  = 16.6, 6.2 Hz, 1H, one proton of CH<sub>2</sub>), 2.88 – 2.76 (m, 1H, CH), 2.30 – 2.15 (m, 2H, CH<sub>2</sub>), 1.75 – 1.45 (m, 4H, 2  $\times$  CH<sub>2</sub>), 0.14 (s, 9H, Si(CH<sub>3</sub>)<sub>3</sub>);  $^{13}\text{C}$  NMR (100 MHz,  $\text{CDCl}_3$ )  $\delta$  207.6, 199.1, 137.2, 132.9, 128.5, 128.0, 107.2, 93.4, 84.6, 76.5, 43.6, 34.1, 33.5, 26.1, 19.8, 0.13; IR (neat,  $\text{cm}^{-1}$ ) 3087, 3061, 3030, 2956, 2929, 2900, 2861, 2173, 1955, 1686, 1598, 1580, 1448, 1407, 1360, 1328, 1248, 1217, 1180, 1159, 1002; MS (70 eV, EI)  $m/z$  (%) 310 ( $\text{M}^+$ , 1.32), 105 (100); HRMS calcd for  $\text{C}_{20}\text{H}_{26}\text{OSi}$  ( $\text{M}^+$ ): 310.1753, found 310.1750.

## 9. Synthesis of 3-phenyl-1-(thien-2-yl)hexa-4,5-dien-1-one (**3mg**, zth-5-069)

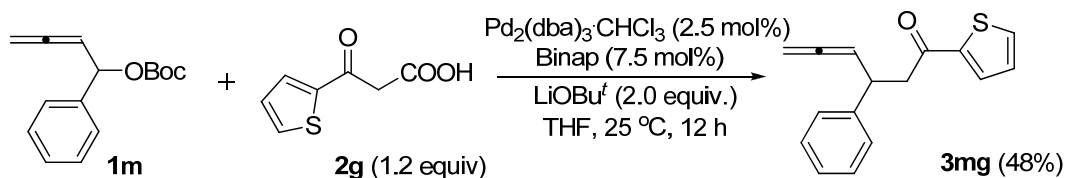

According to **Typical Procedure IV**, the reaction of **1m** (246.5 mg, 1.0 mmol), **2g** (204.0 mg, 1.2 mmol),  $\text{Pd}_2(\text{dba})_3 \cdot \text{CHCl}_3$  (25.9 mg, 0.025 mmol), binap (47.6 mg, 0.075 mmol), and  $\text{LiOBu}^t$  (159.9 mg, 2.0 mmol) in THF (5 mL) afforded **3mg** (122.7 mg, 48%) [eluent: petroleum ether / ethyl acetate = 1000/1 (4 L) to 500/1 for the first round afforded impure **3mg**, which was further purified by eluent: petroleum ether / diethyl ether = 500/1 (2 L) to 250/1 (2 L) to 100/1 (1 L) for the second round] as a liquid:  $^1\text{H}$  NMR (400 MHz,  $\text{CDCl}_3$ )  $\delta$  7.66 (dd,  $J$  = 3.4 Hz, 1.0 Hz, 1H, ArH), 7.59 (dd,  $J$  = 5.0 Hz, 0.6 Hz, 1H, ArH), 7.34 – 7.27 (m, 4H, ArH), 7.26 – 7.16 (m, 1H, ArH), 7.11 – 7.05 (m, 1H, ArH), 5.42 (q,  $J$  = 6.3 Hz, 1H, =CH), 4.85 – 4.71 (m, 2H, =CH<sub>2</sub>), 4.19 – 4.09 (m, 1H, CH), 3.44 (dd,  $J$  = 16.4, 8.0 Hz, 1H, one proton of CH<sub>2</sub>), 3.17 (dd,  $J$  = 16.6, 6.2 Hz, 1H, one proton of CH<sub>2</sub>);  $^{13}\text{C}$  NMR (100 MHz,  $\text{CDCl}_3$ )  $\delta$  207.6, 191.0,



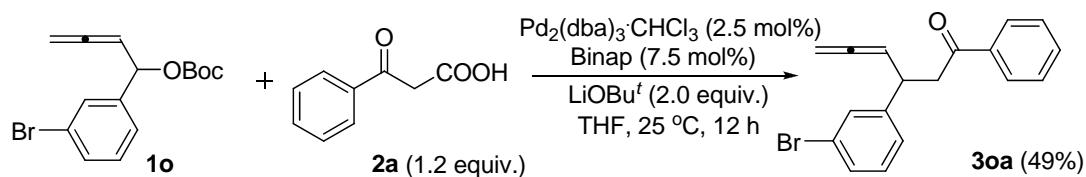

According to **Typical Procedure IV**, the reaction of **1o** (325.4 mg, 1.0 mmol), **2a** (197.1 mg, 1.2 mmol),  $\text{Pd}_2(\text{dba})_3 \cdot \text{CHCl}_3$  (25.7 mg, 0.025 mmol), binap (47.7 mg, 0.075 mmol), and  $\text{LiOBu}^t$  (160.1 mg, 2.0 mmol) in THF (5 mL) afforded **30a** (163.6 mg, 49%, purity = 98%) [eluent: petroleum ether / ethyl acetate = 1000/1 (4 L) to 500/1 (0.5 L)] as a liquid:  $^1\text{H}$  NMR (400 MHz,  $\text{CDCl}_3$ )  $\delta$  7.98 – 7.88 (m, 2H, ArH), 7.59 – 7.51 (m, 1H, ArH), 7.50 - 7.40 (m, 3H, ArH), 7.38 – 7.30 (m, 1H, ArH), 7.29 – 7.22 (m, 1H, ArH), 7.16 (t,  $J$  = 7.8 Hz, 1H, ArH), 5.39 (q,  $J$  = 6.1 Hz, 1H, =CH), 4.87 - 4.71 (m, 2H, =CH<sub>2</sub>), 4.20 - 4.08 (m, 1H, CH), 3.52 (dd,  $J$  = 17.0, 7.8 Hz, 1H, one proton of CH<sub>2</sub>), 3.21 (dd,  $J$  = 17.4, 6.2 Hz, 1H, one proton of CH<sub>2</sub>);  $^{13}\text{C}$  NMR (100 MHz,  $\text{CDCl}_3$ )  $\delta$  207.6, 197.6, 146.0, 136.9, 133.1, 130.8, 130.1, 129.8, 128.5, 127.9, 126.6, 122.5, 93.6, 78.0, 44.2, 38.8; IR (neat,  $\text{cm}^{-1}$ ) 3084, 3037, 2985, 2895, 2855, 1955, 1684, 1595, 1580, 1567, 1474, 1448, 1426, 1406, 1359, 1299, 1285, 1243, 1202, 1181, 1092, 1073; MS (70 eV, EI)  $m/z$  (%) 328 [ $\text{M}^+(\text{}^{81}\text{Br})$ , 3.42], 326 [ $\text{M}^+(\text{}^{79}\text{Br})$ , 3.40], 105 (100); HRMS calcd for  $\text{C}_{18}\text{H}_{15}^{79}\text{BrO}$  ( $\text{M}^+$ ): 326.0306, found 326.0308.

## 12. Synthesis of 3-(4-bromophenyl)-1-phenylhexa-4,5-dien-1-one (**3pa**, zth-4-129)

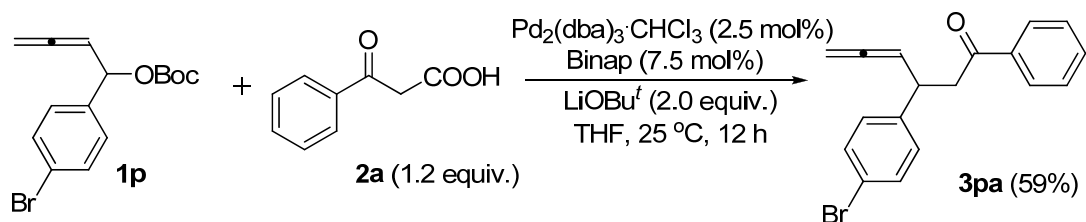

According to **Typical Procedure IV**, the reaction of **1p** (325.4 mg, 1.0 mmol), **2a** (197.2 mg, 1.2 mmol),  $\text{Pd}_2(\text{dba})_3 \cdot \text{CHCl}_3$  (25.8 mg, 0.025 mmol), binap (47.7 mg, 0.075 mmol), and  $\text{LiOBu}^t$  (160.7 mg, 2.0 mmol) in THF (5 mL) afforded **3pa** (193.1 mg, 59%) (eluent : petroleum ether / ethyl acetate = 1000/1) as a liquid:  $^1\text{H}$  NMR (400 MHz,  $\text{CDCl}_3$ )  $\delta$  7.95 – 7.89 (m, 2H, ArH), 7.55 (t,  $J$  = 7.6 Hz, 1H, ArH), 7.48 - 7.38 (m, 4H, ArH), 7.19 (d,  $J$  = 8.4 Hz, 2H, ArH), 5.39 (q,  $J$  = 6.1 Hz, 1H, =CH), 4.85 -

4.70 (m, 2H, =CH<sub>2</sub>), 4.18 - 4.07 (m, 1H, CH), 3.50 (dd,  $J = 17.6, 7.6$  Hz, 1H, one proton of CH<sub>2</sub>), 3.21 (dd,  $J = 17.6, 6.8$  Hz, 1H, one proton of CH<sub>2</sub>); <sup>13</sup>C NMR (100 MHz, CDCl<sub>3</sub>)  $\delta$  207.6, 197.8, 142.6, 136.9, 133.1, 131.5, 129.5, 128.5, 127.9, 120.4, 93.7, 77.9, 44.3, 38.7; IR (neat, cm<sup>-1</sup>): 1955, 1685, 1596, 1580, 1487, 1448, 1434, 1404, 1359, 1319, 1298, 1280, 1245, 1203, 1181, 1159, 1102, 1073, 1010; MS (70 eV, EI)  $m/z$  (%) 328 [ $M^+$  (<sup>81</sup>Br), 3.95], 326 [ $M^+$  (<sup>79</sup>Br), 3.82], 105 (100); HRMS calcd for C<sub>18</sub>H<sub>15</sub><sup>79</sup>BrO ( $M^+$ ): 326.0306, found 326.0308.

### 13. Synthesis of 3-(4-(methoxycarbonylphenyl)-1-phenylhexa-4,5-dien-1-one (3qa, zth-4-136)

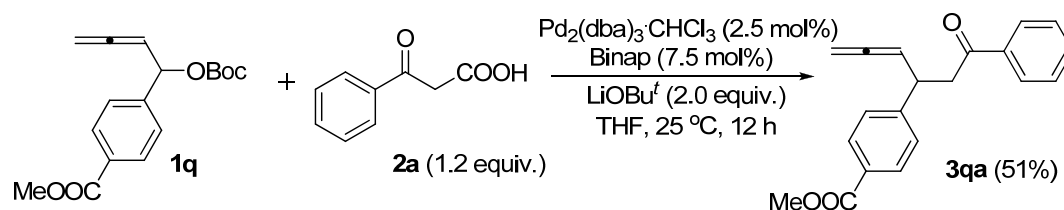

According to **Typical Procedure IV**, the reaction of **1q** (304.6 mg, 1.0 mmol), **2a** (197.1 mg, 1.2 mmol), Pd<sub>2</sub>(dba)<sub>3</sub>·CHCl<sub>3</sub> (25.9 mg, 0.025 mmol), binap (47.7 mg, 0.075 mmol), and LiOBu<sup>t</sup> (160.4 mg, 2.0 mmol) in THF (5 mL) afforded **3qa** (156.2 mg, 51%) [eluent: petroleum ether (60–90 °C) / ethyl acetate = 1000/1(2 L) to 500/1 (2 L) to 250/1(1 L)] as a liquid: <sup>1</sup>H NMR (400 MHz, CDCl<sub>3</sub>)  $\delta$  8.00 – 7.95 (m, 2H, ArH), 7.94 - 7.89 (m, 2H, ArH), 7.55 (tt,  $J = 7.4, 1.5$  Hz, 1H, ArH), 7.47 – 7.41 m, 2H, ArH), 7.41 – 7.35 (m, 2H, ArH), 5.42 (q,  $J = 6.4$  Hz, 1H, =CH), 4.86 - 4.71 (m, 2H, =CH<sub>2</sub>), 4.27 – 4.18 (m, 1H, CH), 3.90 (s, 3H, CH<sub>3</sub>), 3.54 (dd,  $J = 17.4, 7.4$  Hz, 1H, one proton of CH<sub>2</sub>), 3.26 (dd,  $J = 17.2, 6.4$  Hz, 1H, one proton of CH<sub>2</sub>); <sup>13</sup>C NMR (100 MHz, CDCl<sub>3</sub>)  $\delta$  207.7, 197.7, 166.9, 148.9, 136.9, 133.1, 129.8, 128.58, 128.56, 127.9, 127.8, 93.6, 78.0, 52.0, 44.1, 39.2; IR (neat, cm<sup>-1</sup>): 1955, 1718, 1684, 1609, 1434, 1276, 1180, 1103, 1019, 1001; MS (70 eV, EI)  $m/z$  (%) 306 ( $M^+$ , 8.84), 105 (100); HRMS calcd for C<sub>20</sub>H<sub>18</sub>O<sub>3</sub> ( $M^+$ ): 306.1256, found 306.1254.

### 14. Synthesis of 3-(3-cyanophenyl)-1-phenylhexa-4,5-dien-1-one (3ra, zth-4-137)

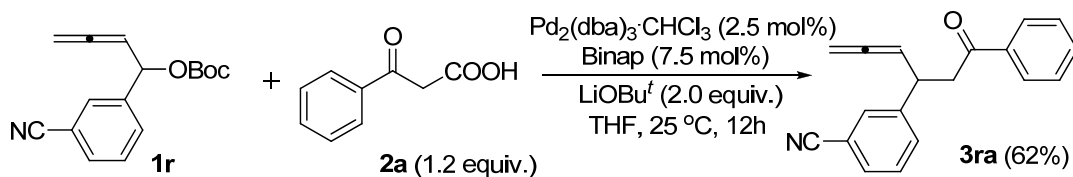

According to **Typical Procedure IV**, the reaction of **1r** (271.4 mg, 1.0 mmol), **2a** (197.1 mg, 1.2 mmol),  $\text{Pd}_2(\text{dba})_3 \cdot \text{CHCl}_3$  (25.8 mg, 0.025 mmol), binap (47.7 mg, 0.075 mmol), and  $\text{LiOBu}^t$  (160.3 mg, 2.0 mmol) in THF (5 mL) afforded **3ra** (168.3, 62%) [eluent : petroleum ether / ethyl acetate = 1000/1 (2 L) to 500/1 (2 L) to 250/1 (1 L)] as a liquid:  $^1\text{H}$  NMR (400 MHz,  $\text{CDCl}_3$ )  $\delta$  7.95 – 7.89 (m, 2H, ArH), 7.64 - 7.60 (m, 1H, ArH), 7.60 – 7.54 (m, 2H, ArH), 7.50 (dt,  $J = 7.9$  Hz, 1.4 Hz, 1H, ArH), 7.49 - 7.38 (m, 3H, ArH), 5.40 (q,  $J = 6.4$  Hz, 1H, =CH), 4.90 – 4.76 (m, 2H, =CH<sub>2</sub>), 4.25 - 4.15 (m, 1H, CH), 3.53 (dd,  $J = 17.8, 7.0$  Hz, 1H, one proton of CH<sub>2</sub>), 3.26 (dd,  $J = 17.6, 6.8$  Hz, 1H, one proton of CH<sub>2</sub>);  $^{13}\text{C}$  NMR (100 MHz,  $\text{CDCl}_3$ )  $\delta$  207.7, 197.3, 145.1, 136.7, 133.3, 132.6, 131.5, 130.4, 129.2, 128.6, 127.9, 118.9, 112.5, 93.3, 78.3, 44.0, 38.7; IR (neat,  $\text{cm}^{-1}$ ) 3085, 3063, 3030, 2999, 2966, 2902, 2854, 2229, 1956, 1686, 1598, 1581, 1482, 1449, 1360, 1258, 1204, 1002; MS (70 eV, EI)  $m/z$  (%) 273 ( $\text{M}^+$ , 8.96), 105 (100); HRMS calcd for  $\text{C}_{19}\text{H}_{15}\text{NO}$  ( $\text{M}^+$ ): 273.1154, found 273.1152.

#### 15. Synthesis of 1-(naphthalen-2-yl)-3-(propa-1,2-dienyl)undec-4-yn-1-one (**3si**, **zth-5-096**)

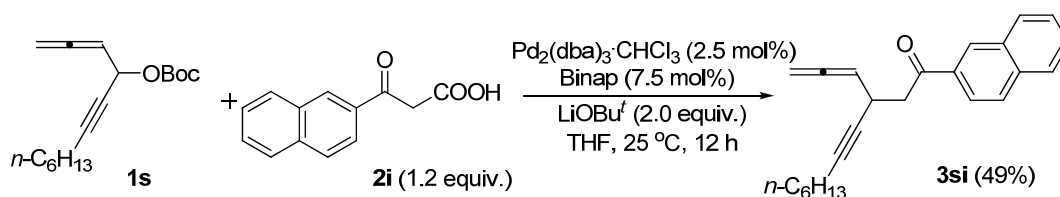

According to **Typical Procedure IV**, the reaction of **1s** (278.4 mg, 1.0 mmol), **2i** (257.4 mg, 1.2 mmol),  $\text{Pd}_2(\text{dba})_3 \cdot \text{CHCl}_3$  (25.9 mg, 0.025 mmol), binap (47.8 mg, 0.075 mmol), and  $\text{LiOBu}^t$  (160.1 mg, 2.0 mmol) in THF (5 mL) afforded **3si** (161.7 mg, 49%) [eluent: petroleum ether / ethyl acetate = 1000/1 (4 L) to 500/1 (1 L) for the first round afforded impure **3si**, which was further purified by eluent: petroleum ether / ethyl acetate = 1000/0 (1 L) to 1000/1 (1 L) to 500/1 (4 L) for the second round] as a liquid:  $^1\text{H}$  NMR (400 MHz,  $\text{CDCl}_3$ )  $\delta$  8.49 (s, 1H, ArH), 8.04 (dd,  $J = 8.8$  Hz, 1.6 Hz,



1H, ArH), 7.97 (d,  $J = 7.6$  Hz, 1H, ArH), 7.88 (t,  $J = 7.6$  Hz, 2H, ArH), 7.64 – 7.50 (m, 2H, ArH), 5.35 (q,  $J = 6.4$  Hz, 1H, =CH), 4.87 – 4.74 (m, 2H, =CH<sub>2</sub>), 3.92 – 3.80 (m, 1H, CH), 3.48 – 3.30 (m, 2H, CH<sub>2</sub>), 2.13 (td,  $J = 7.0, 2.7$  Hz, 2H, CH<sub>2</sub>), 1.48 – 1.36 (m, 2H, CH<sub>2</sub>), 1.36 – 1.14 (m, 6H, 3 × CH<sub>2</sub>), 0.85 (t,  $J = 7.0$  Hz, 3H, CH<sub>3</sub>); <sup>13</sup>C NMR (100 MHz, CDCl<sub>3</sub>)  $\delta$  207.4, 197.5, 135.6, 134.3, 132.5, 129.9, 129.6, 128.5, 128.4, 127.8, 126.8, 123.9, 92.2, 82.7, 80.3, 78.0, 43.9, 31.3, 28.8, 28.4, 26.7, 22.5, 18.7, 14.0. IR (neat, cm<sup>-1</sup>) 3059, 2954, 2928, 2856, 1957, 1681, 1627, 1596, 1468, 1434, 1405, 1357, 1276, 1233, 1208, 1182, 1171, 1123, 1048, 1020; MS (70 eV, EI)  $m/z$  (%) 330 ( $M^+$ , 7.51), 155 (100); HRMS calcd for C<sub>24</sub>H<sub>26</sub>O ( $M^+$ ): 330.1984, found 330.1982.

### Mechanistic studies

#### 1. The reaction of **2a** with LiOt-Bu quenching with D<sub>2</sub>O-Synthesis of acetophenone-D (**4a-D**, zth-6-094)

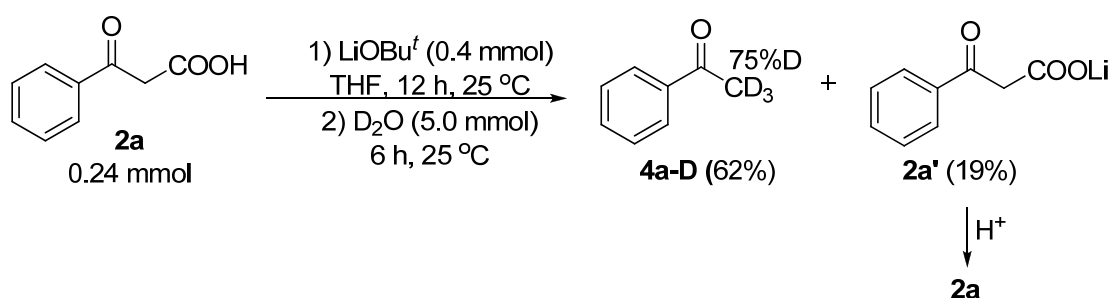

**Typical Procedure V:** To an oven-dried Schlenk tube equipped with a magnetic stirring bar were added **2a** (39.5 mg, 0.24 mmol), LiOBu<sup>t</sup> (32.0 mg, 0.40 mmol), and THF (1 mL) sequentially under argon. The mixture was stirred at 25 °C for 12 hours. After that, D<sub>2</sub>O (90  $\mu$ L,  $d = 1.107$  g/mL, 99.6 mg, 5.00 mmol) was added under argon. Then, the mixture was stirred for at 25 °C for 6 hours. The resulting mixture was filtered and washed with Et<sub>2</sub>O (10 mL  $\times$  3). The solid containing **2a'** was collected and treated with an aqueous HCl solution (3 N, 20 mL). Then to the resulting mixture were added sequentially water (20 mL) and DCM (20 mL). The organic phase was separated and the aqueous phase was extracted with DCM (20 mL  $\times$  3). The combined organic phase was washed with brine, dried over anhydrous Na<sub>2</sub>SO<sub>4</sub>, and

evaporated to afford **2a**<sup>5</sup> (7.5 mg, 19%, ketone : enol = 2.6 : 1) as a solid. The filtrate was concentrated and purified by chromatography on silica gel [eluent: petroleum ether (30 - 60 °C) / ethyl ether = 10/1] to afford **4a-D**<sup>6</sup> (18.3 mg, 62% , D% = 75%) as a liquid.

**2a**: <sup>1</sup>H NMR (400 MHz, CDCl<sub>3</sub>) δ 8.04 – 7.92 (m, 2H, ArH), 7.66 (t, *J* = 7.4 Hz, 1H, ArH), 7.58 – 7.50 (m, 2H, ArH), 4.09 (s, 2H, CH<sub>2</sub>); the following signals are discernible for Enol-**2a**: 12.30 (s, 1H, OH), 7.84 – 7.78 (m, 2H, ArH), 7.50 – 7.40 (m, 3H, ArH), 5.73 (s, 1H, =CH); MS (70 eV, EI) *m/z* (%) 164 (*M*<sup>+</sup>, 9.00), 105 (100).

**4a-D**: <sup>1</sup>H NMR (400 MHz, CDCl<sub>3</sub>) δ 8.02 – 7.90 (m, 2H, ArH), 7.57 (tt, *J* = 7.5 Hz, 1.5 Hz, 1H, ArH), 7.52 – 7.42 (m, 2H, ArH), the following signal is discernible for **4a**: 2.64 – 2.55 (m, 0.75 H); IR (neat, cm<sup>-1</sup>): 1677, 1597, 1580, 1449, 1317, 1265, 1219, 1180, 1160, 1074, 1027, 1001; MS (70 eV, EI) *m/z* (%) 123 [*M*<sup>+</sup>(CD<sub>3</sub>), 15.67], 122 [*M*<sup>+</sup>(CHD<sub>2</sub>), 14.26], 121 [*M*<sup>+</sup>(CH<sub>2</sub>D), 8.86], 120 [*M*<sup>+</sup>(CH<sub>3</sub>), 4.80].

## 2. The reaction of **2d** with LiOt-Bu quenching with D<sub>2</sub>O-Synthesis of 4'-methoxyacetophenone-D (**4d-D**, zth-6-092)

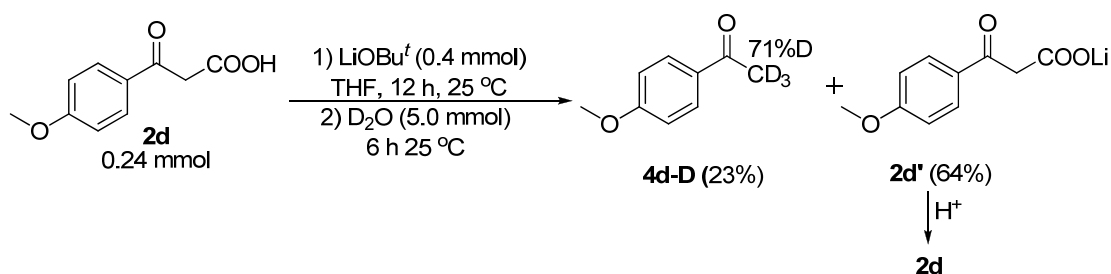

According to **Typical Procedure V**, the reaction of **2d** (46.7 mg, 0.24 mmol), LiOt-Bu<sup>t</sup> (32.2 mg, 0.40 mmol), and D<sub>2</sub>O (90 uL, 99.6 mg, 5.00 mmol) in THF (1 mL) afforded **4d-D**<sup>7</sup> (8.4 mg, 23%, D% = 71%) as a solid and afforded **2d**<sup>8</sup> (29.9 mg, 64%, ketone : enol = 7.1 : 1) by acidification of **2d'** as a solid.

**4d-D**: <sup>1</sup>H NMR (400 MHz, CDCl<sub>3</sub>) δ 7.94 (dt, *J* = 9.8 Hz, 2.3 Hz, 2H, ArH), 6.94 (dt, *J* = 9.5 Hz, 2.4 Hz, 2H, ArH), 3.87 (s, 3H, CH<sub>3</sub>), the following signal is discernible for **4d**: 2.56 – 2.50 (m, 0.86H); IR (neat, cm<sup>-1</sup>): 1663, 1598, 1576, 1507, 1462, 1444, 1416, 1306, 1275, 1252, 1170, 1109, 1078, 1022; MS(ESI) *m/z* 154 [*M*(CD<sub>3</sub>)+H]<sup>+</sup>, 153 [*M*(CHD<sub>2</sub>)+H]<sup>+</sup>, 152 [*M*(CH<sub>2</sub>D)+H]<sup>+</sup>, 151 [*M*(CH<sub>3</sub>)+H]<sup>+</sup>; HRMS

calcd for C<sub>9</sub>H<sub>7</sub>D<sub>3</sub>O<sub>2</sub> [M(CD<sub>3</sub>)]<sup>+</sup>: 153.0869, found 153.0867.

**2d**: <sup>1</sup>H NMR (400 MHz, CDCl<sub>3</sub>) δ 7.97 (d, *J* = 9.2 Hz, 2H, ArH), 6.98 (d, *J* = 8.4 Hz, 2H, ArH), 4.03 (s, 2H, CH<sub>2</sub>), 3.90 (s, 3H, CH<sub>3</sub>); the following signals are discernible for Enol-**2d**: <sup>1</sup>H NMR (400 MHz, CDCl<sub>3</sub>) δ 12.38 (s, 1H, OH), 7.77 (d, *J* = 9.2 Hz, 2H, ArH), 6.94 (d, *J* = 9.2 Hz, 2H, ArH), 5.63 (s, 1H, =CH), 3.86 (s, 3H, CH<sub>2</sub>); MS (70 eV, EI) *m/z* (%) 194 (M<sup>+</sup>, 5.71), 135 (100).

### 3. The reaction of **2a** with Pd<sub>2</sub>(dba)<sub>3</sub>·CHCl<sub>3</sub> and binap quenching with D<sub>2</sub>O (zth-6-097)

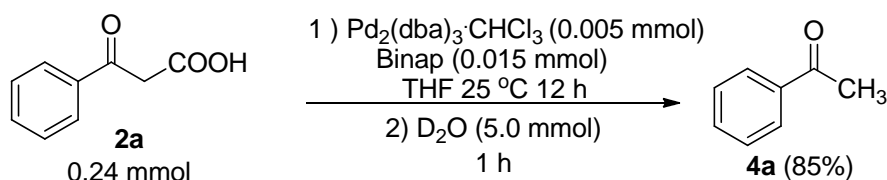

**Typical Procedure VI:** To an oven-dried Schlenk tube equipped with a magnetic stirring bar was added Pd<sub>2</sub>(dba)<sub>3</sub>·CHCl<sub>3</sub> (5.1 mg, 0.005 mmol) and binap (9.6 mg, 0.015 mmol) under argon. Then **2a** (39.7 mg, 0.24 mmol) and THF (1 mL) were added sequentially under argon. The mixture was stirred at 25 °C for 12 hours. After that, D<sub>2</sub>O (90 uL, d = 1.107 g/mL, 99.6 mg, 5.0 mmol) was added under argon. The resulting mixture was stirred for at 25 °C for 1 hours. Evaporation, and column chromatography on silica gel (eluent: petroleum ether (30 – 60 °C) / diethyl ether = 50/1) afforded **4a**<sup>9</sup> (24.5 mg, 85%) as a liquid: <sup>1</sup>H NMR (400 MHz, CDCl<sub>3</sub>) δ 8.00 – 7.93 (m, 2H, ArH), 7.61 – 7.54 (m, 1H, ArH), 7.52 – 7.41 (m, 2H, ArH), 2.61 (s, 3H, CH<sub>3</sub>); <sup>13</sup>C NMR (100 MHz, CDCl<sub>3</sub>) δ 198.2, 137.0, 133.1, 128.5, 128.3, 26.6; IR (neat, cm<sup>-1</sup>): 1681, 1598, 1582, 1448, 1358, 1302, 1263, 1179, 1078, 1023; MS (70 eV, EI) *m/z* (%) 120 (M<sup>+</sup>, 40.54), 105 (100).

### 4. The reaction of **2d** with Pd<sub>2</sub>(dba)<sub>3</sub>·CHCl<sub>3</sub> and binap quenching with D<sub>2</sub>O (zth-6-098)

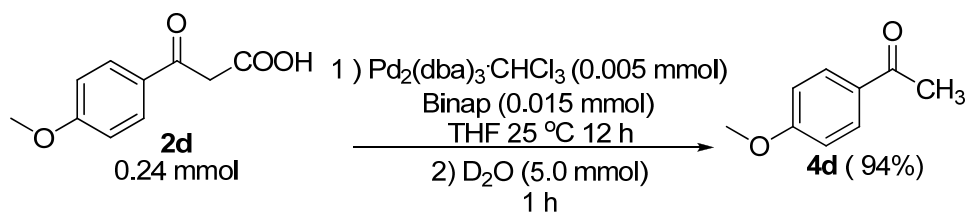

According to **Typical Procedure VI**, the reaction of **2d** (46.6 mg, 0.24 mmol), Pd<sub>2</sub>(dba)<sub>3</sub>·CHCl<sub>3</sub> (5.1 mg, 0.005 mmol), binap (9.6 mg, 0.015 mmol), and D<sub>2</sub>O (90 uL, d = 1.107 g/mL, 99.6 mg, 5.0 mmol) in THF (1 mL) afforded **4d**<sup>9</sup> (33.9 mg, 94%) (eluent: petroleum ether (30–60 °C) / diethyl ether = 20/1): <sup>1</sup>H NMR (400 MHz, CDCl<sub>3</sub>) δ = 7.94 (dt, *J* = 9.6 Hz, 2.5 Hz, 2H, ArH), 6.94 (dt, *J* = 9.3 Hz, 2.4 Hz, 2H, ArH), 3.87 (s, 3H, CH<sub>3</sub>), 2.56 (s, 3H, CH<sub>3</sub>); <sup>13</sup>C NMR (100 MHz, CDCl<sub>3</sub>) δ = 196.8, 163.4, 130.5, 130.3, 113.6, 55.4, 26.3; IR (neat, cm<sup>-1</sup>): 1665, 1596, 1573, 1506, 1461, 1416, 1357, 1276, 1245, 1174, 1111, 1075, 1019; MS(EI) *m/z* (%) 150 (M<sup>+</sup>, 37.02), 135 (100).

#### References:

1. H. Ruo, S. Ma, *Eur. J. Org. Chem.* **2013**, 3041.
2. Q. Li, C. Fu, S. Ma, *Angew. Chem. Int. Ed.* **2012**, 51, 11783.
3. A. K. Buzas, F. M. Istrate, F. Gagosz, *Org. Lett.* **2007**, 9, 985.
4. S. Ohta, A. Tsujimura, A. Okamoto, *Chem. Pharm. Bull.* **1981**, 10, 2762.
5. E. Balducci, E. Attolino, M. Taddei, *Eur. J. Org. Chem.* **2011**, 311.
6. Y. Xu, J. Lu, T.-P. Loh, *J. Am. Chem. Soc.* **2009**, 131, 1372.
7. C. Sabot, K. A. Kumar, C. Antheaume, C. Mioskowski, *J. Org. Chem.* **2007**, 72, 5001.
8. B. J. Flowers, R. Gautreau-Service, P. G. Jessop, *Adv. Synth. Catal.* **2008**, 350, 2947.
9. B. Skillinghaug, J. Rydfjord, J. Savmarker, M. Larhed, *Org. Process Res. Dev.* **2016**, 20, 2005.

benzyl nona-1,2-dien-4-yl carbonate (1e, zth-5-144)

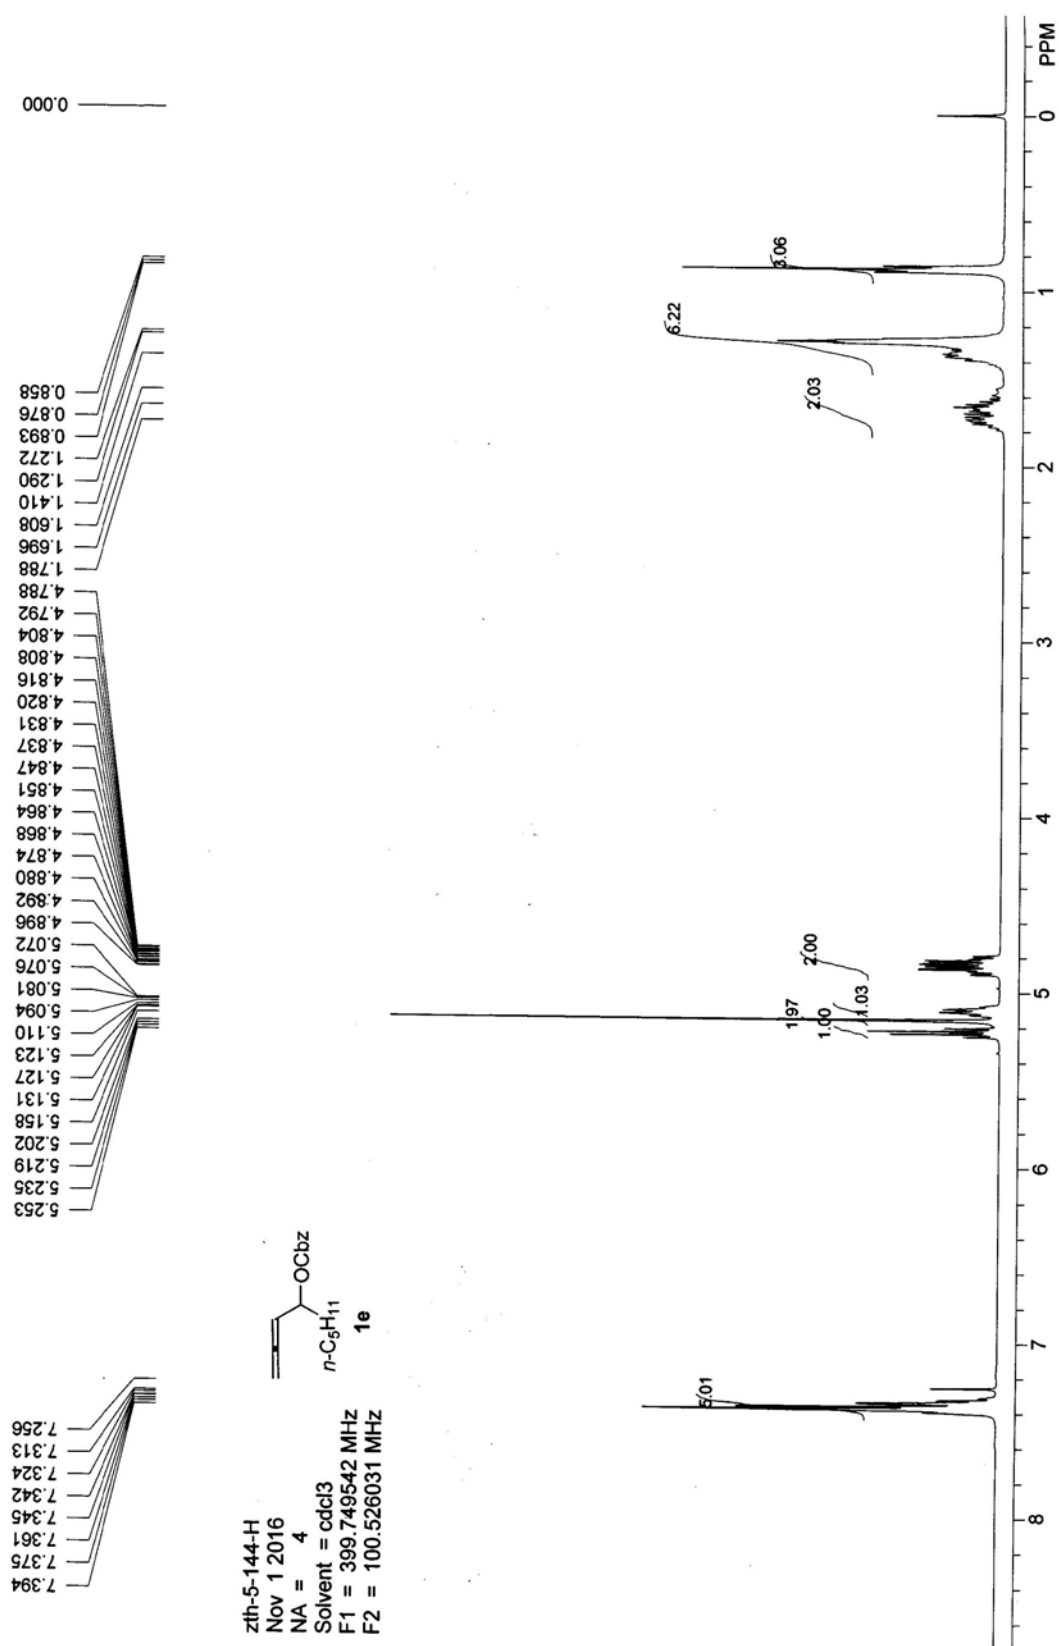

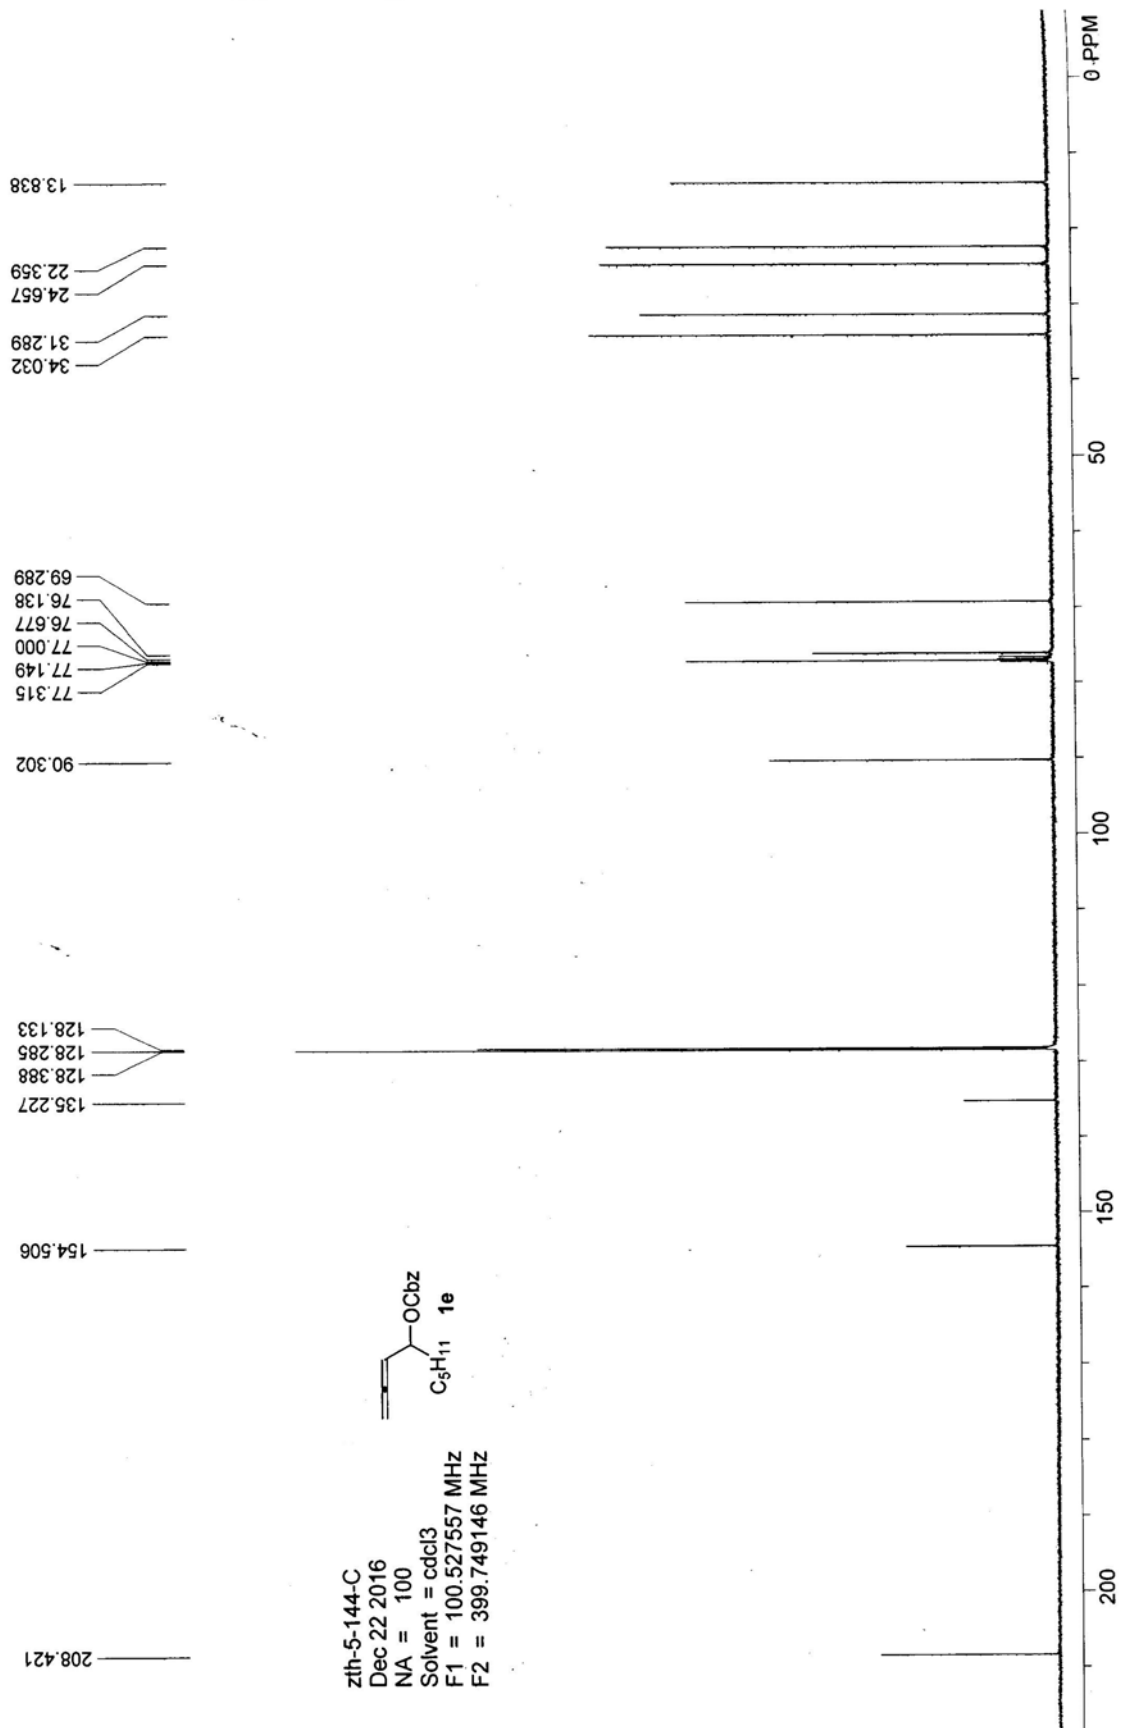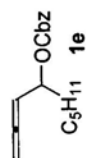

zth-5-144-C  
 Dec 22 2016  
 NA = 100  
 Solvent = cdcl3  
 F1 = 100.527557 MHz  
 F2 = 399.749146 MHz

benzyl deca-1,2-dien-4-yl carbonate (1f, zth-5-105)

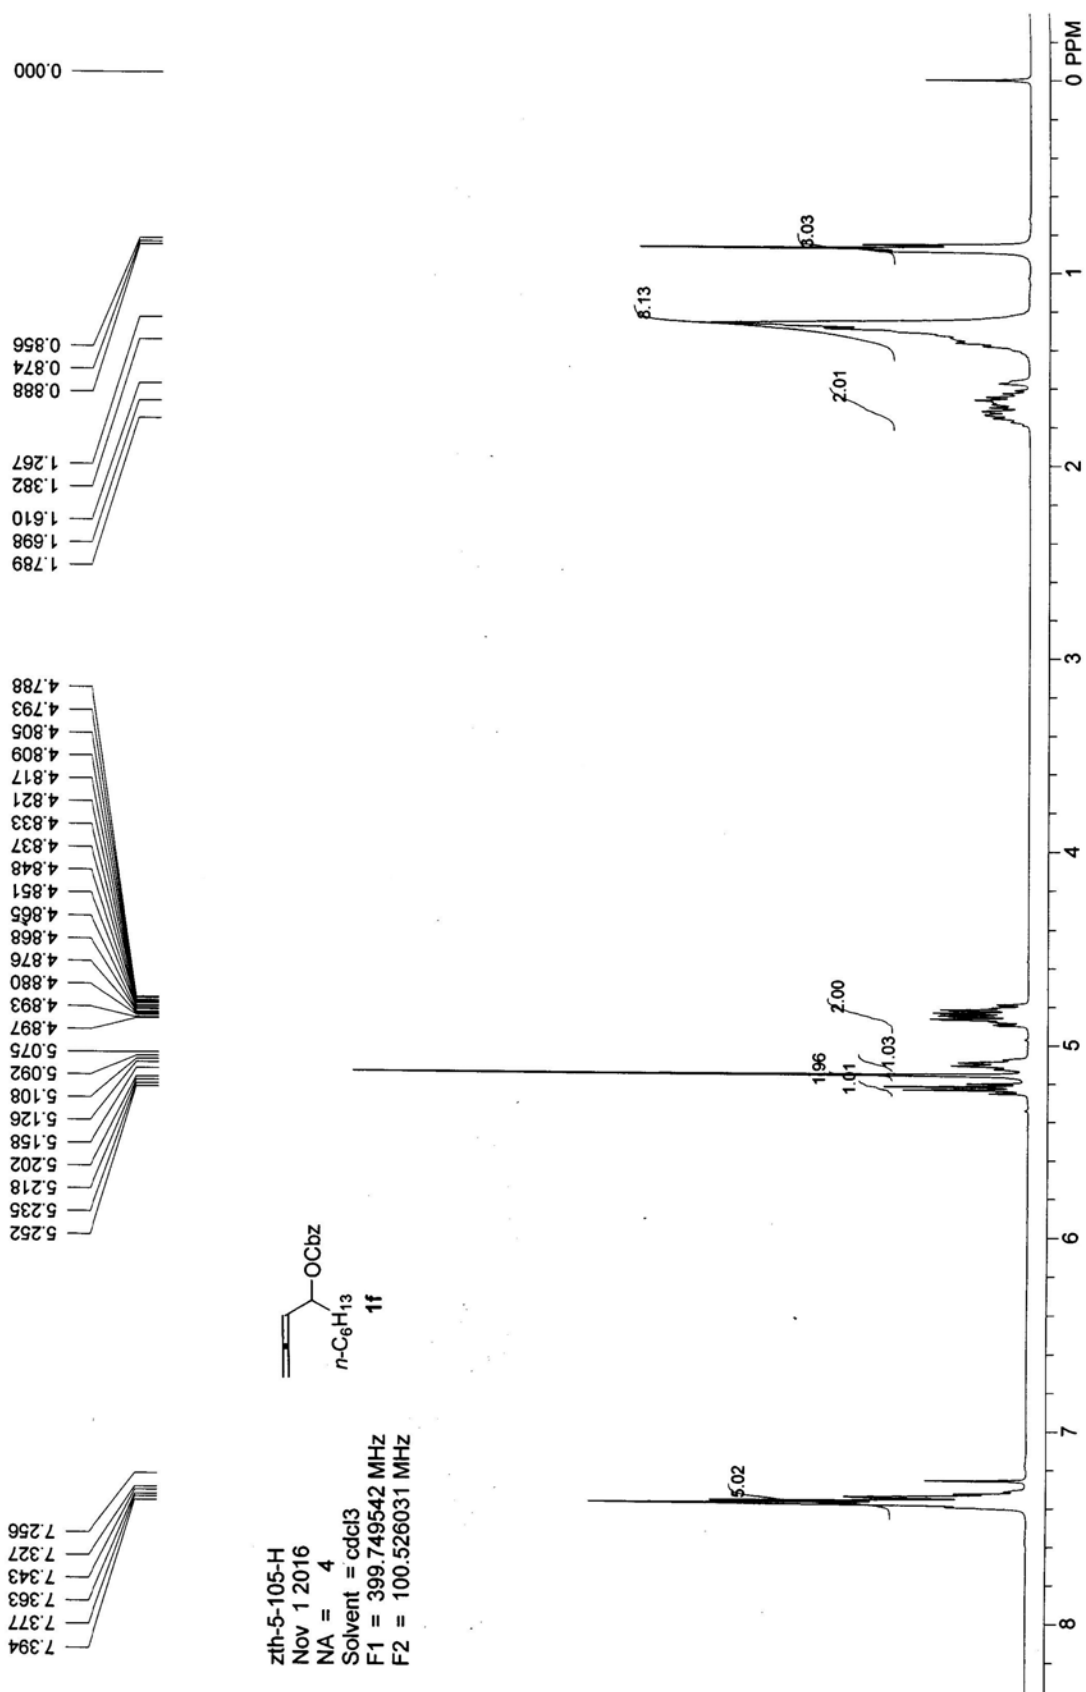

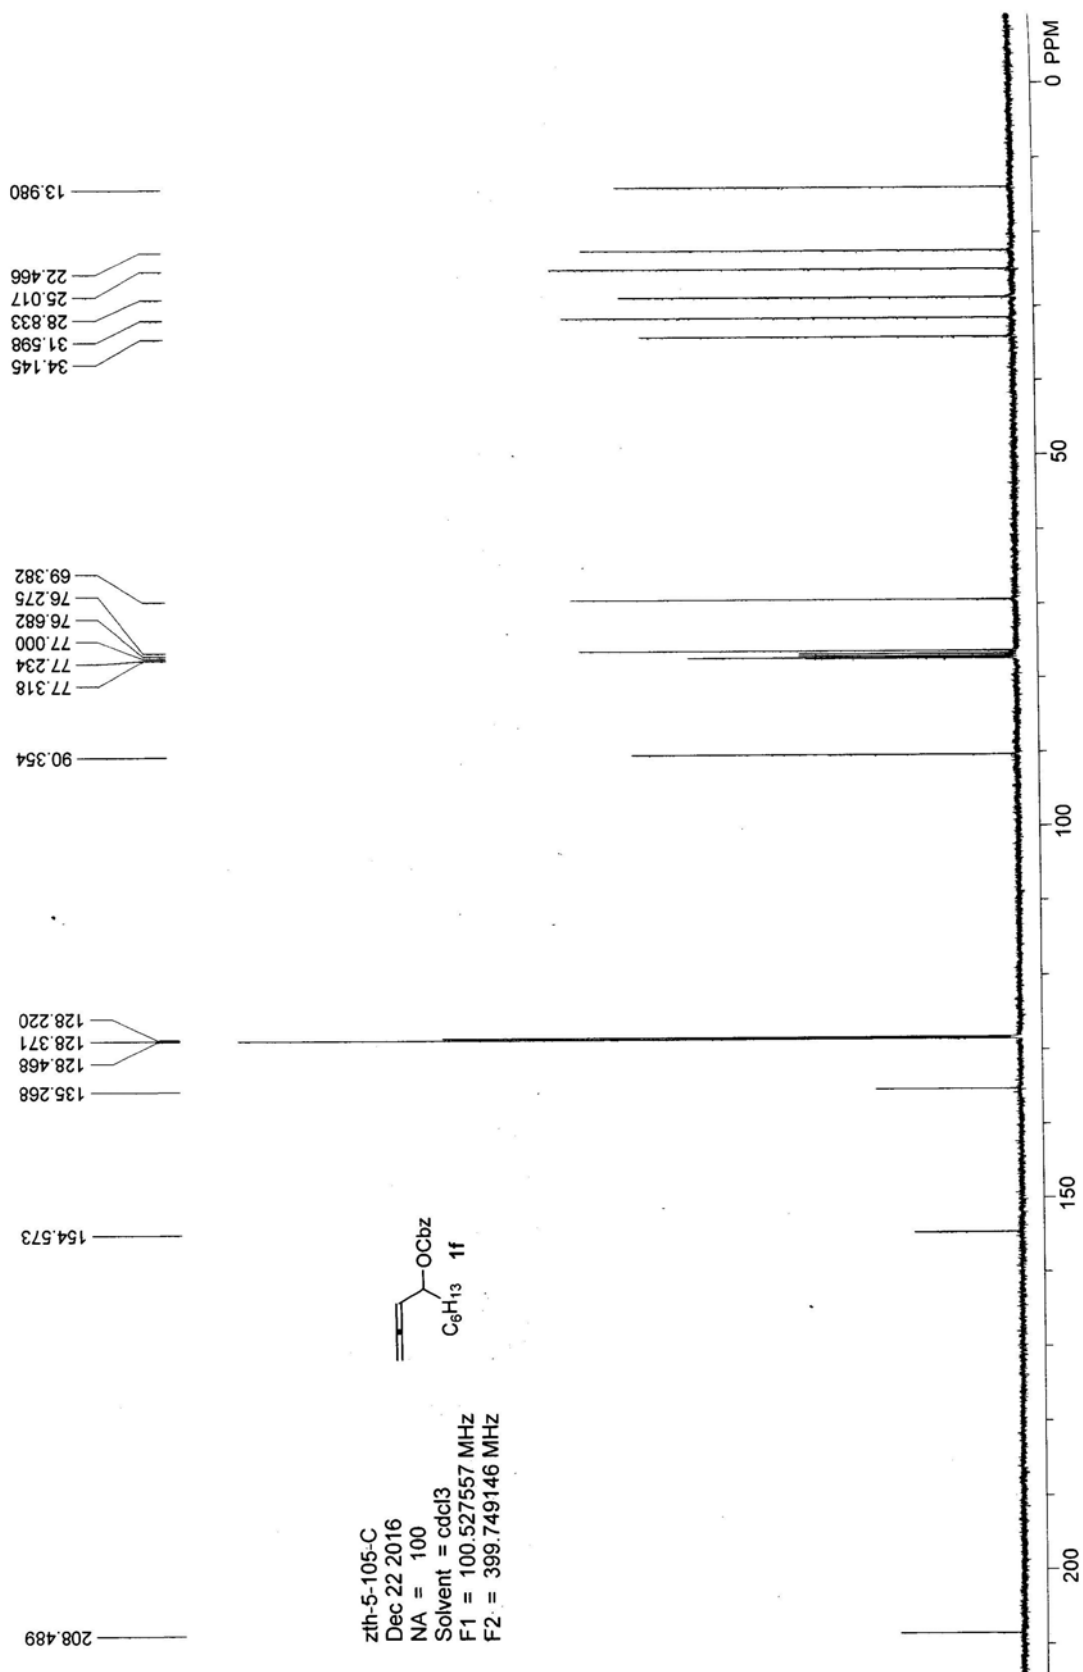



benzyl buta-2,3-dienyl carbonate (1g, zth-4-165)

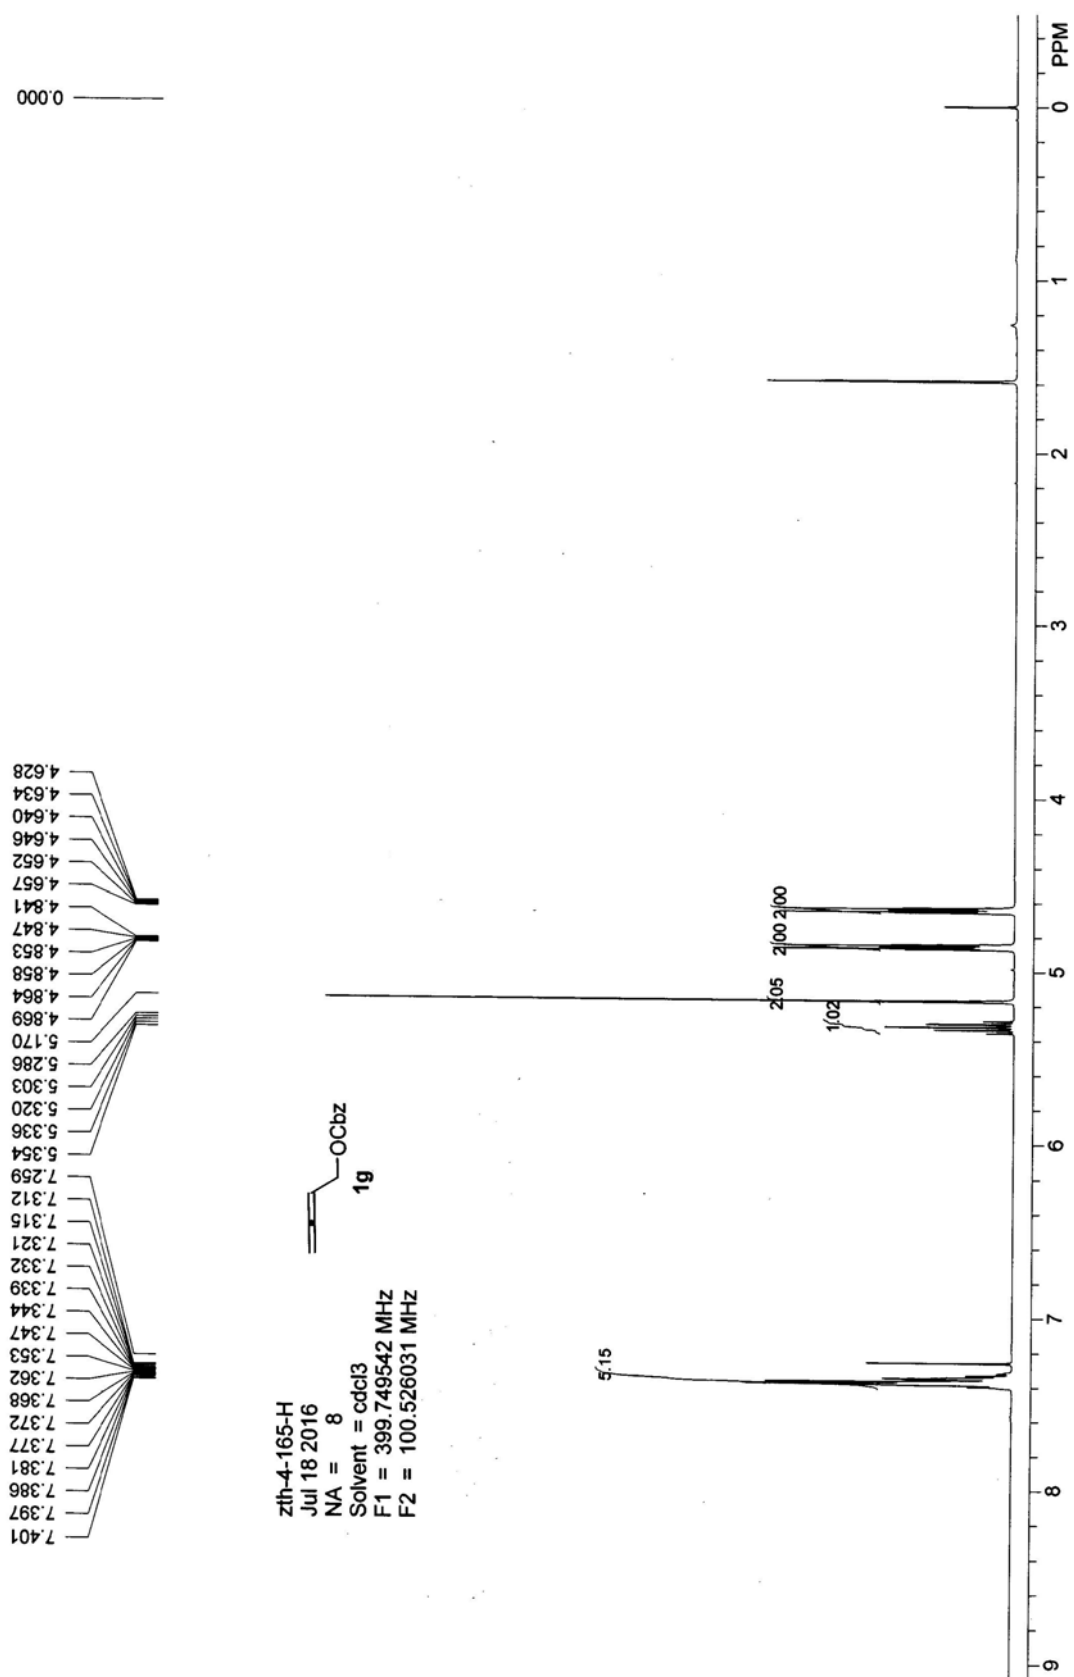

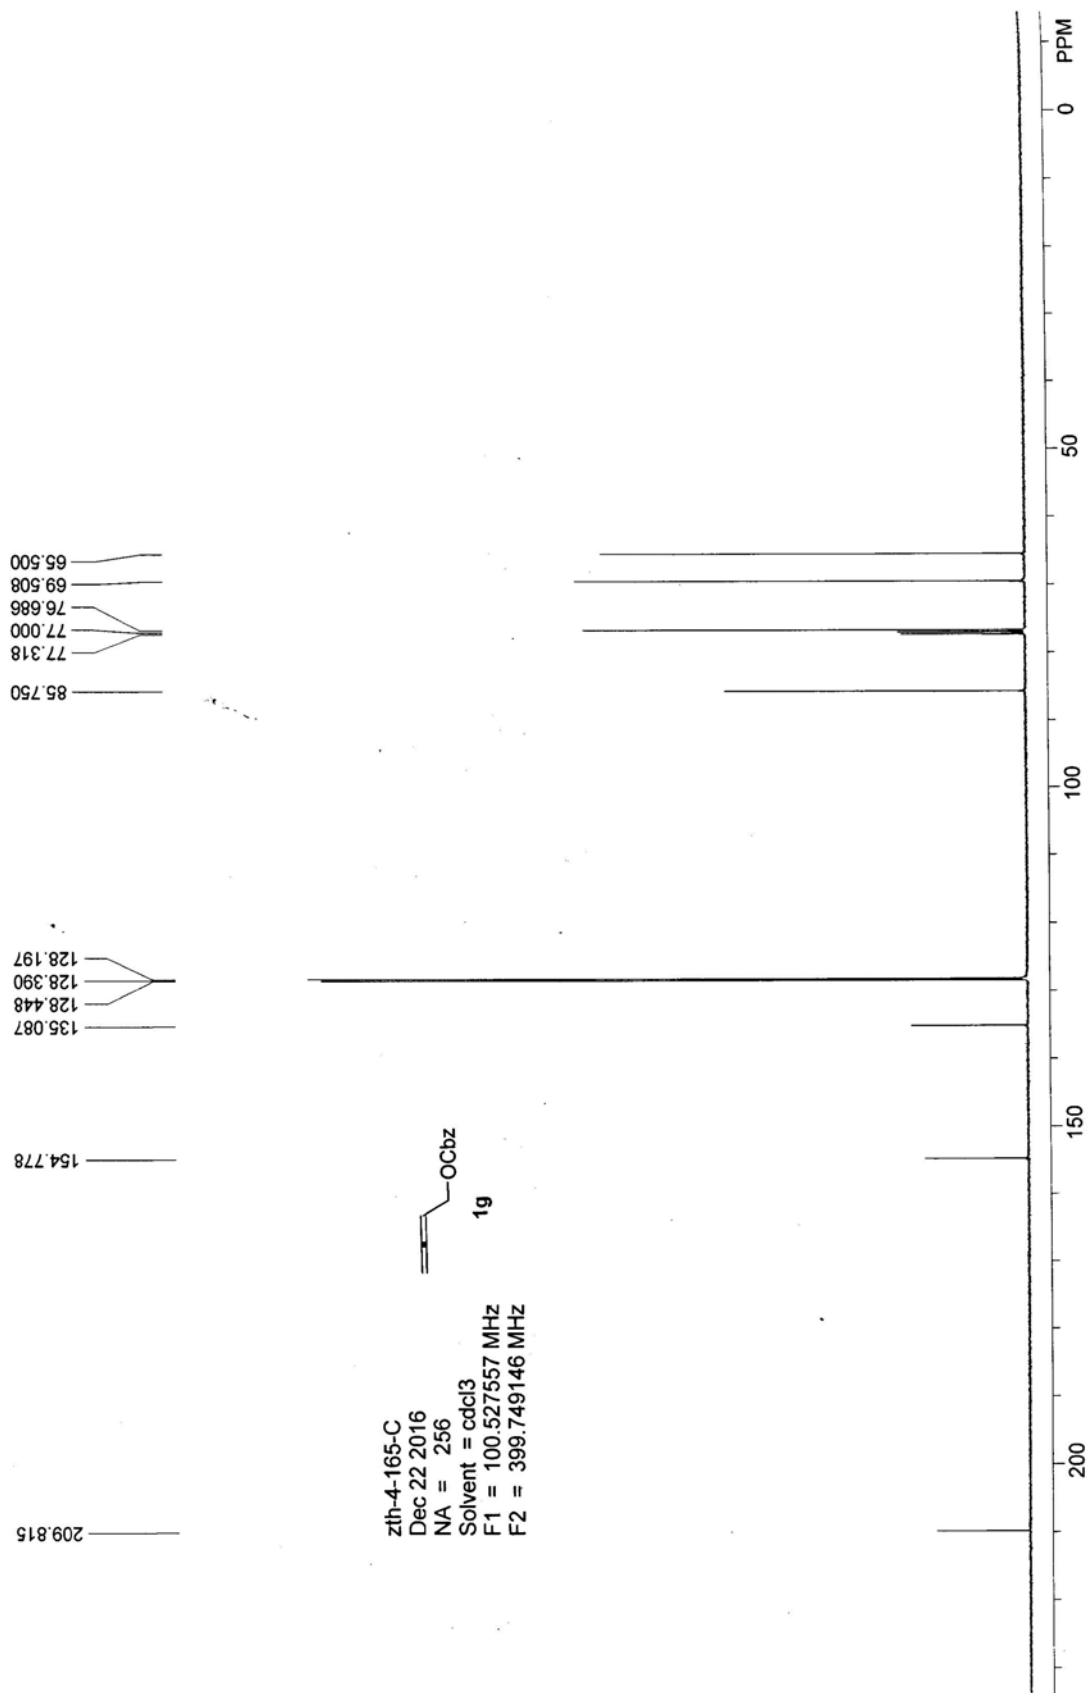

benzyl 1-phenylhexa-4,5-dien-3-yl carbonate (1h, zth-5-013)

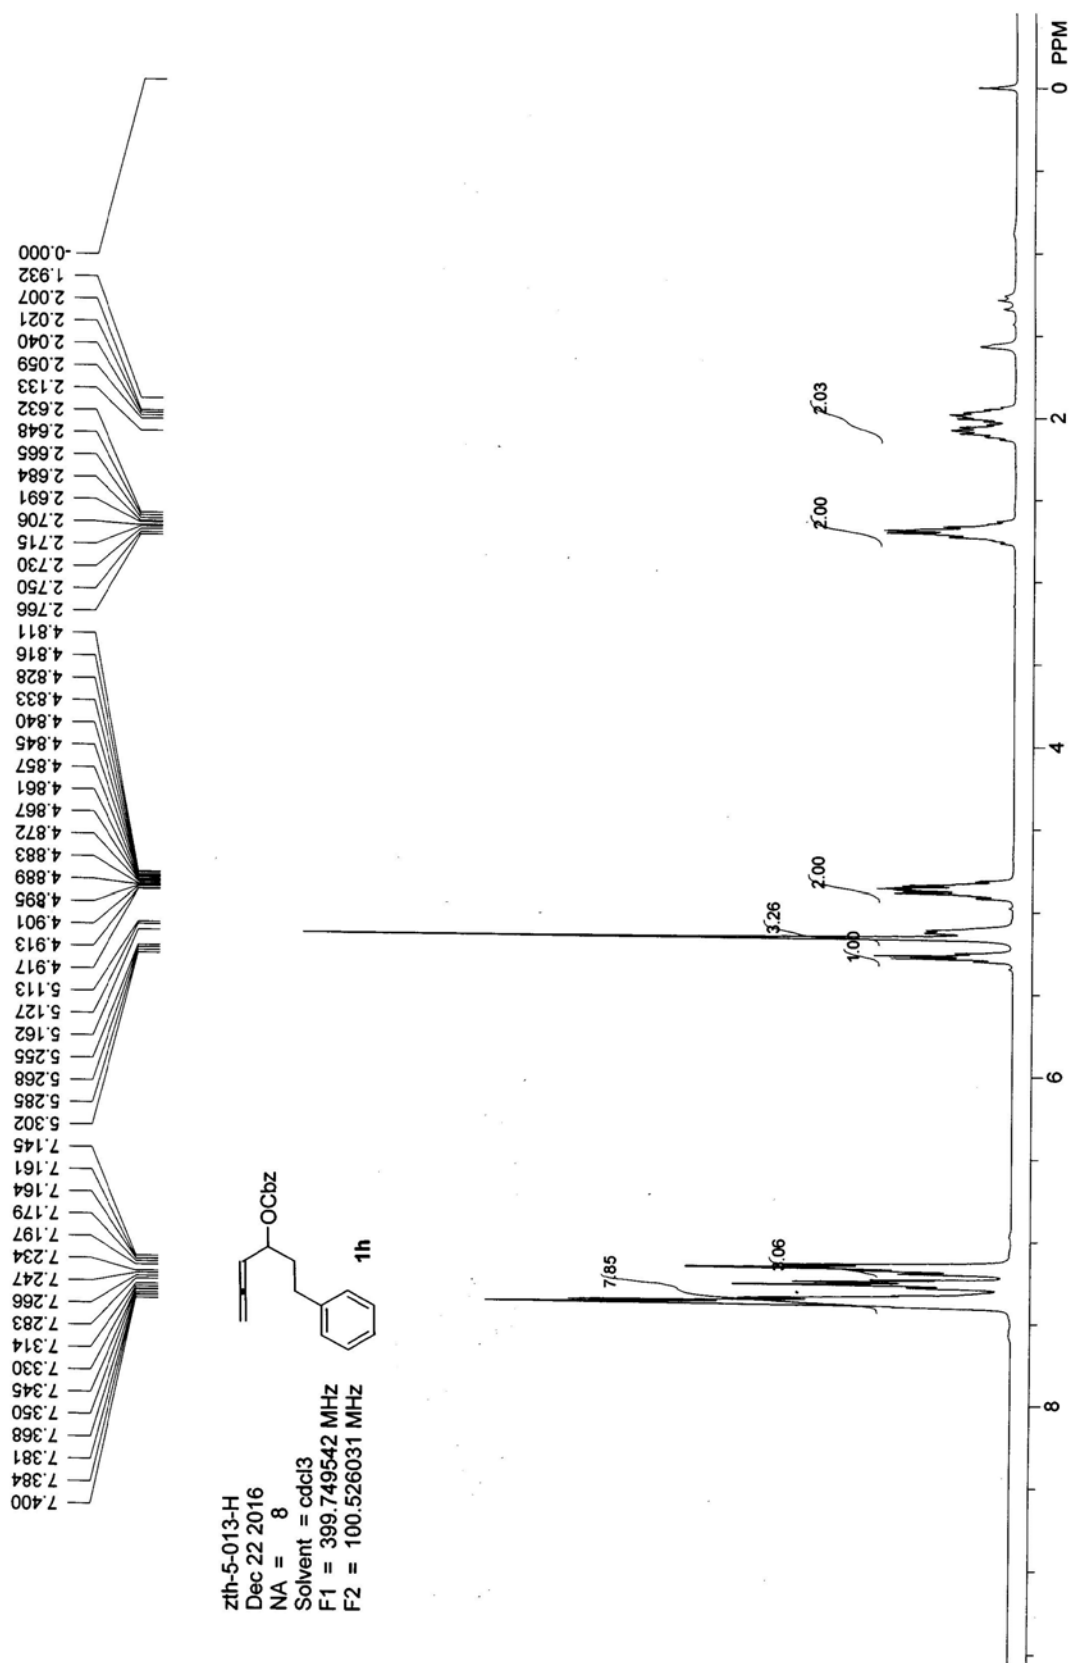

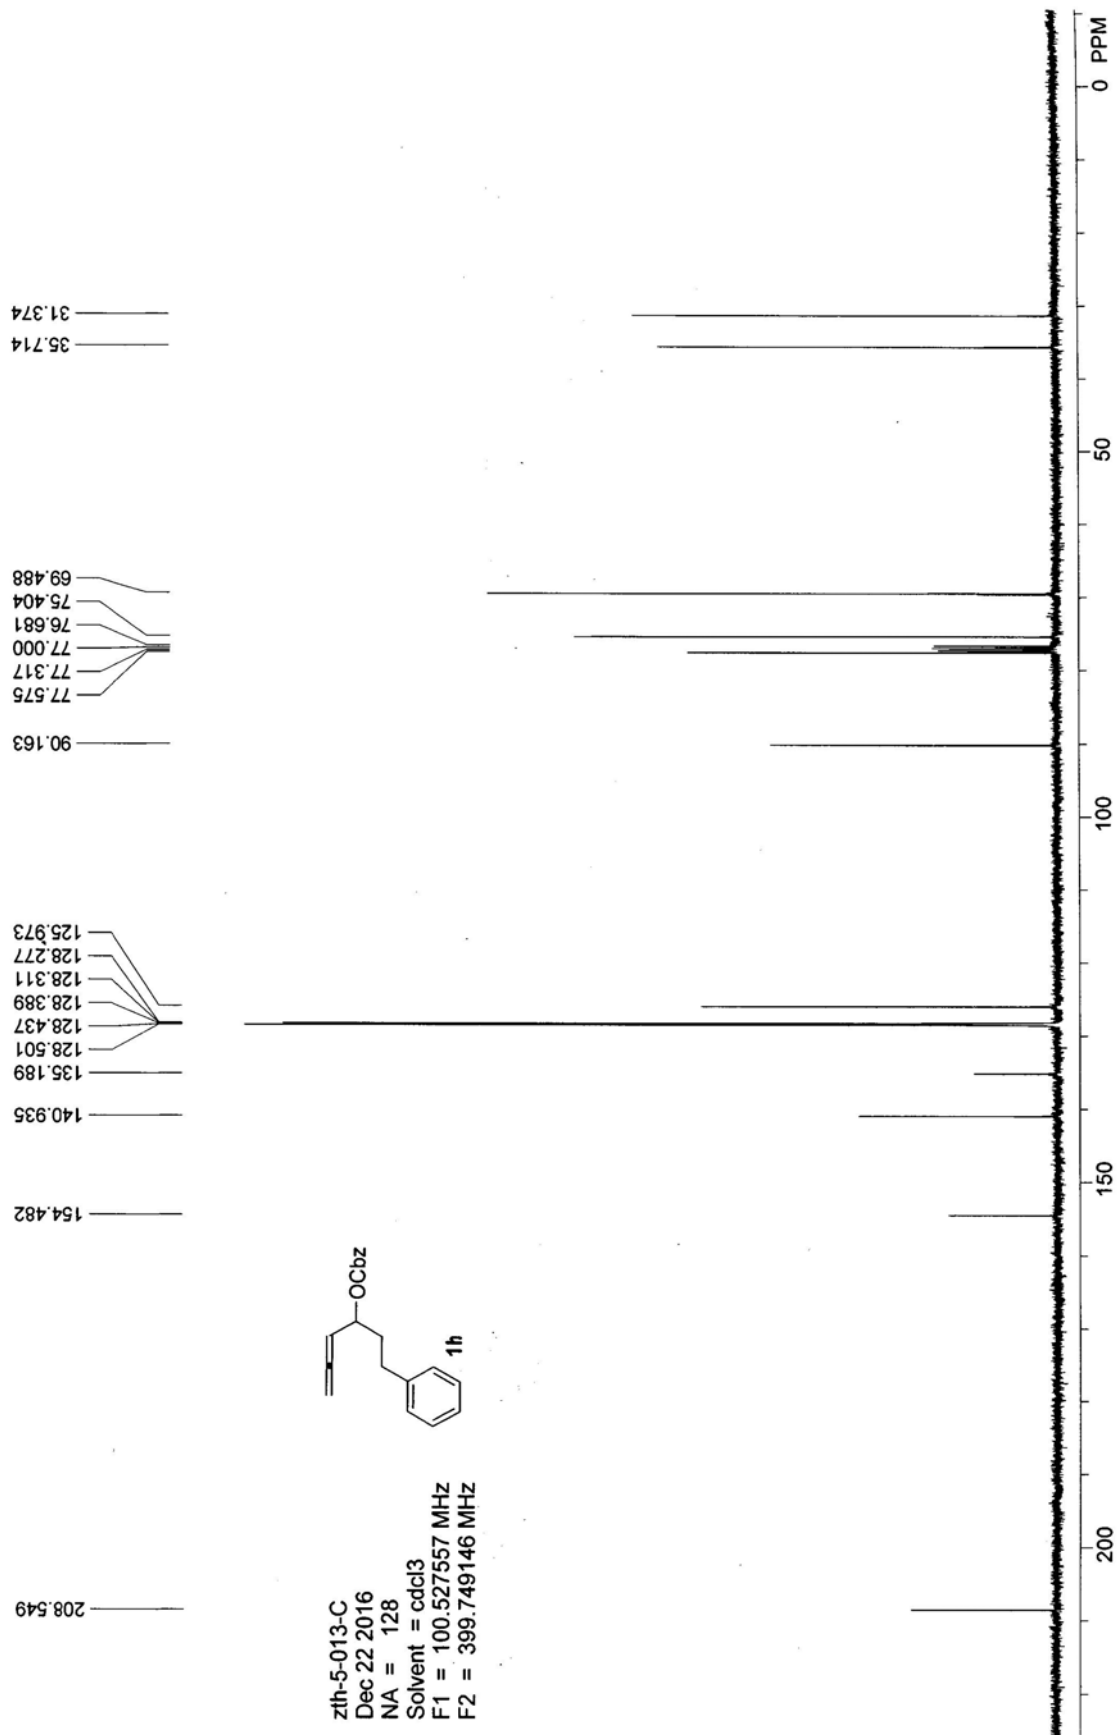

benzyl tetradeca-1,2,13-trien-4-yl carbonate (1i, zth-5-007)

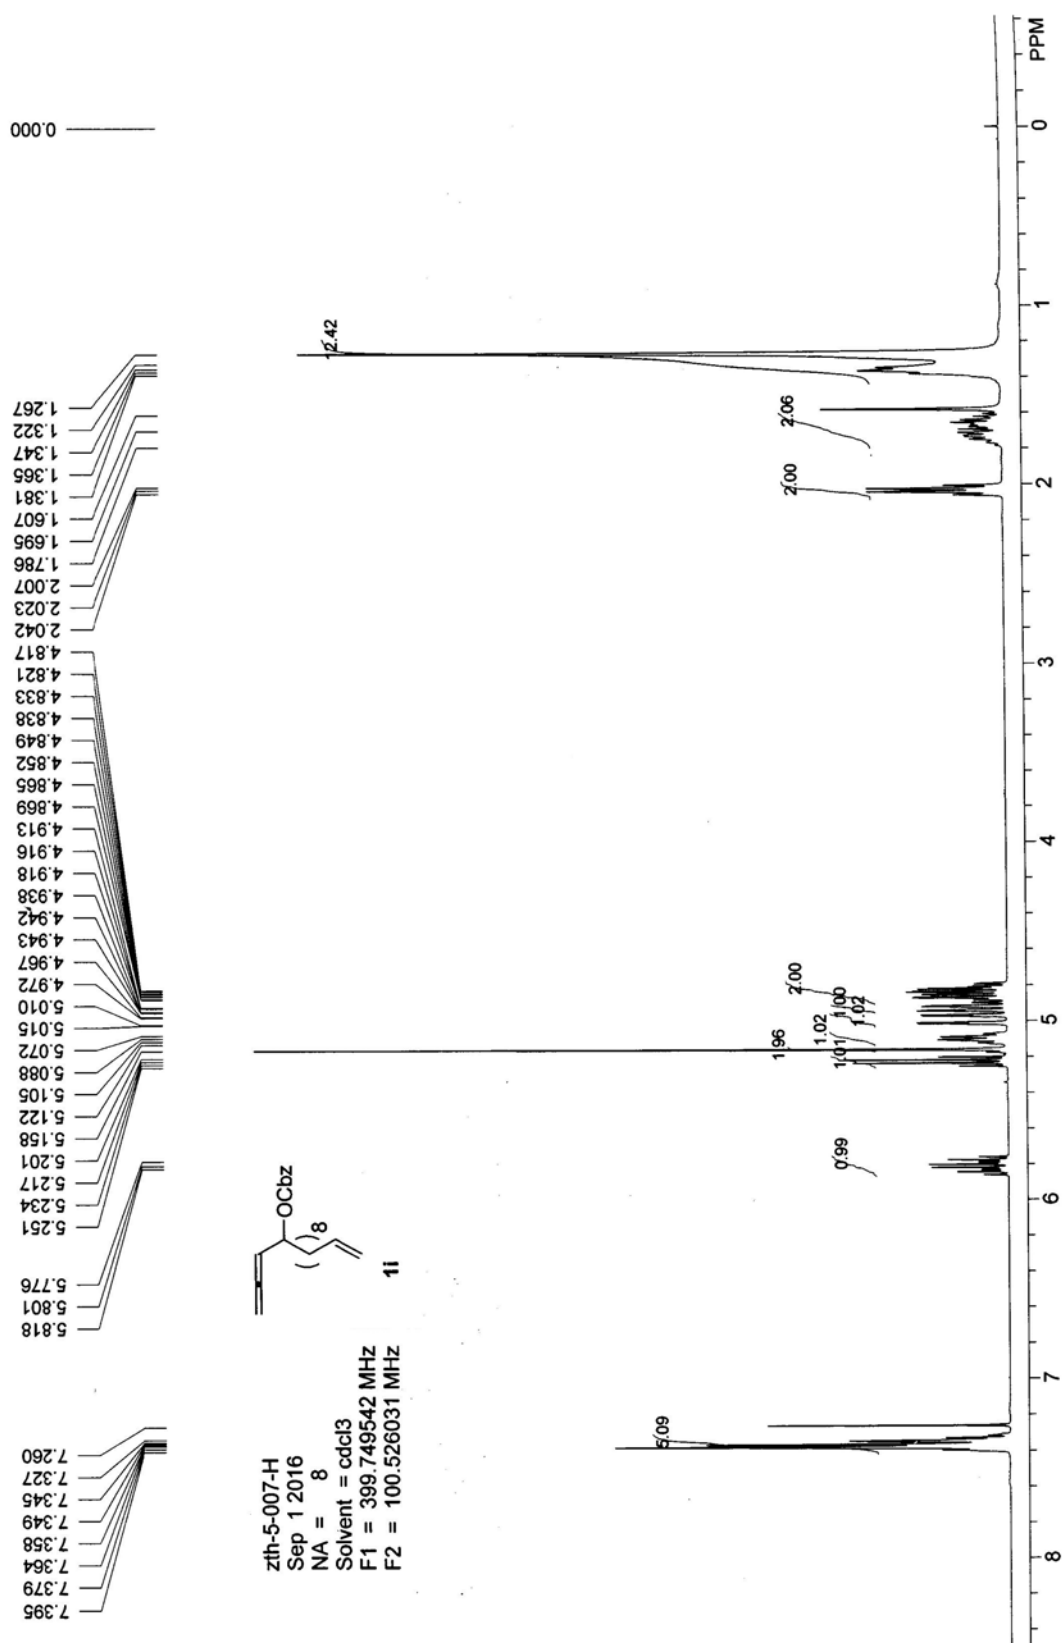

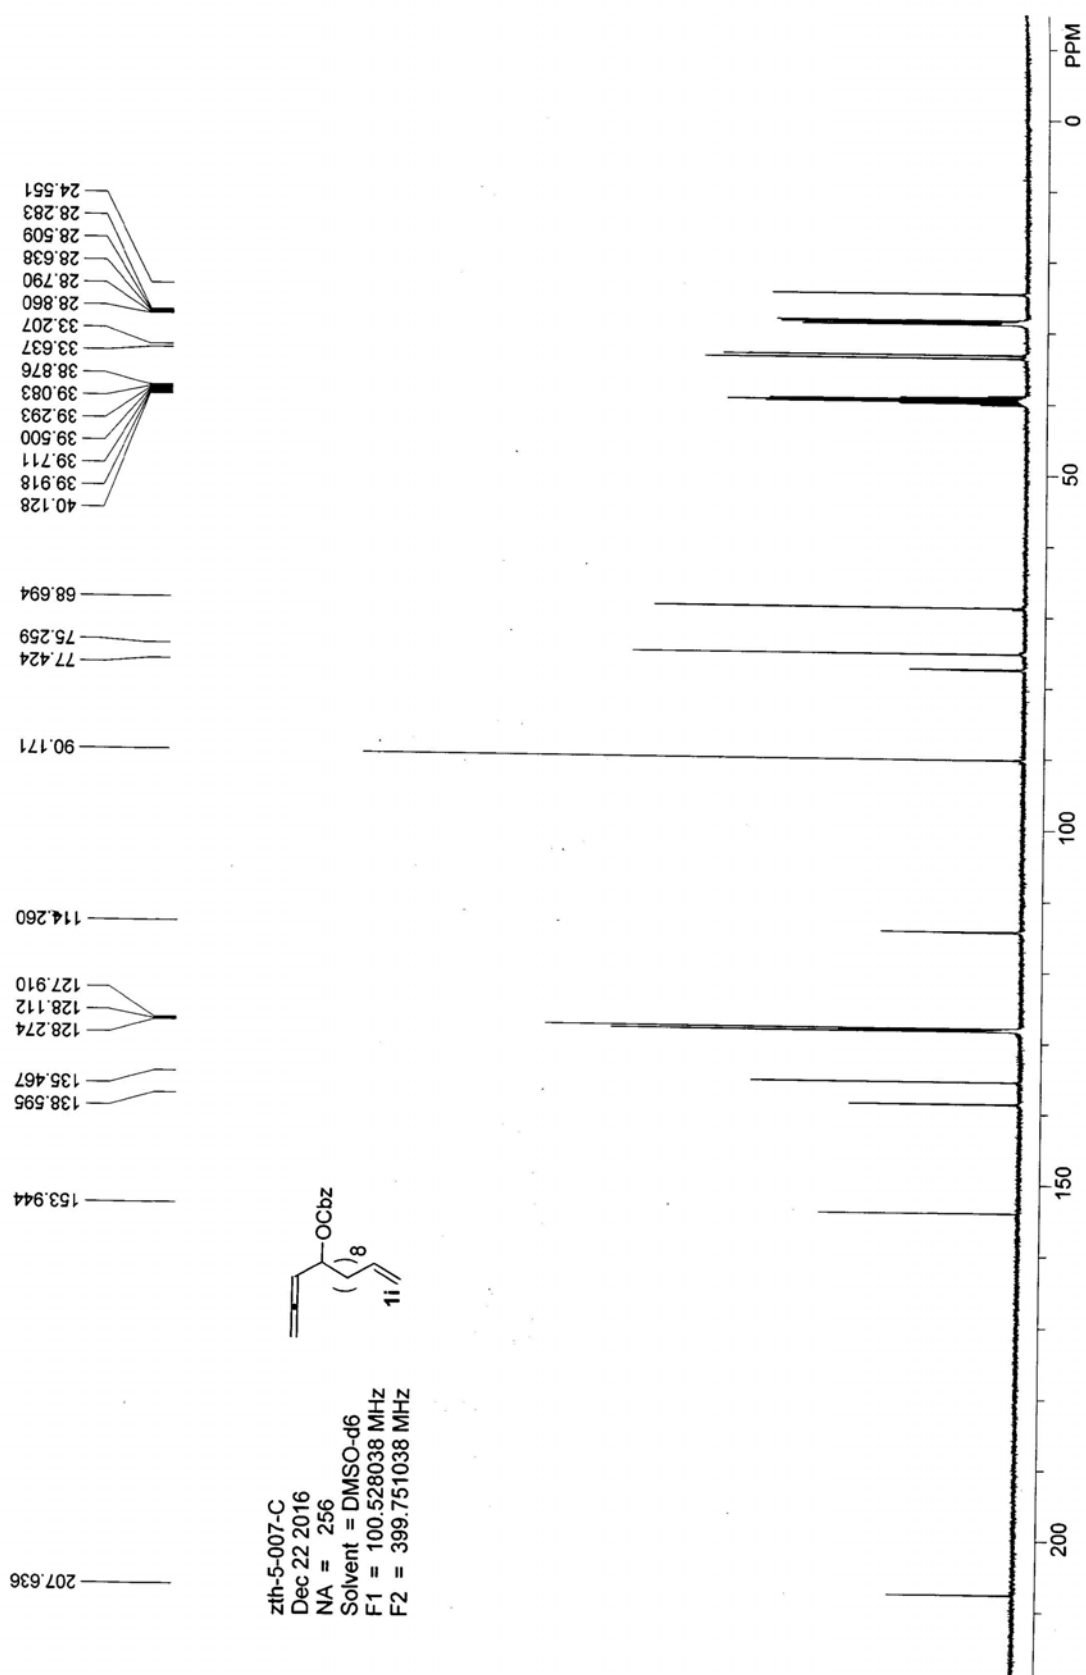

**benzyl 9-(tetrahydro-2H-pyran-2-yloxy)nona-1,2-dien-4-yl carbonate (1j, zth-5-045)**

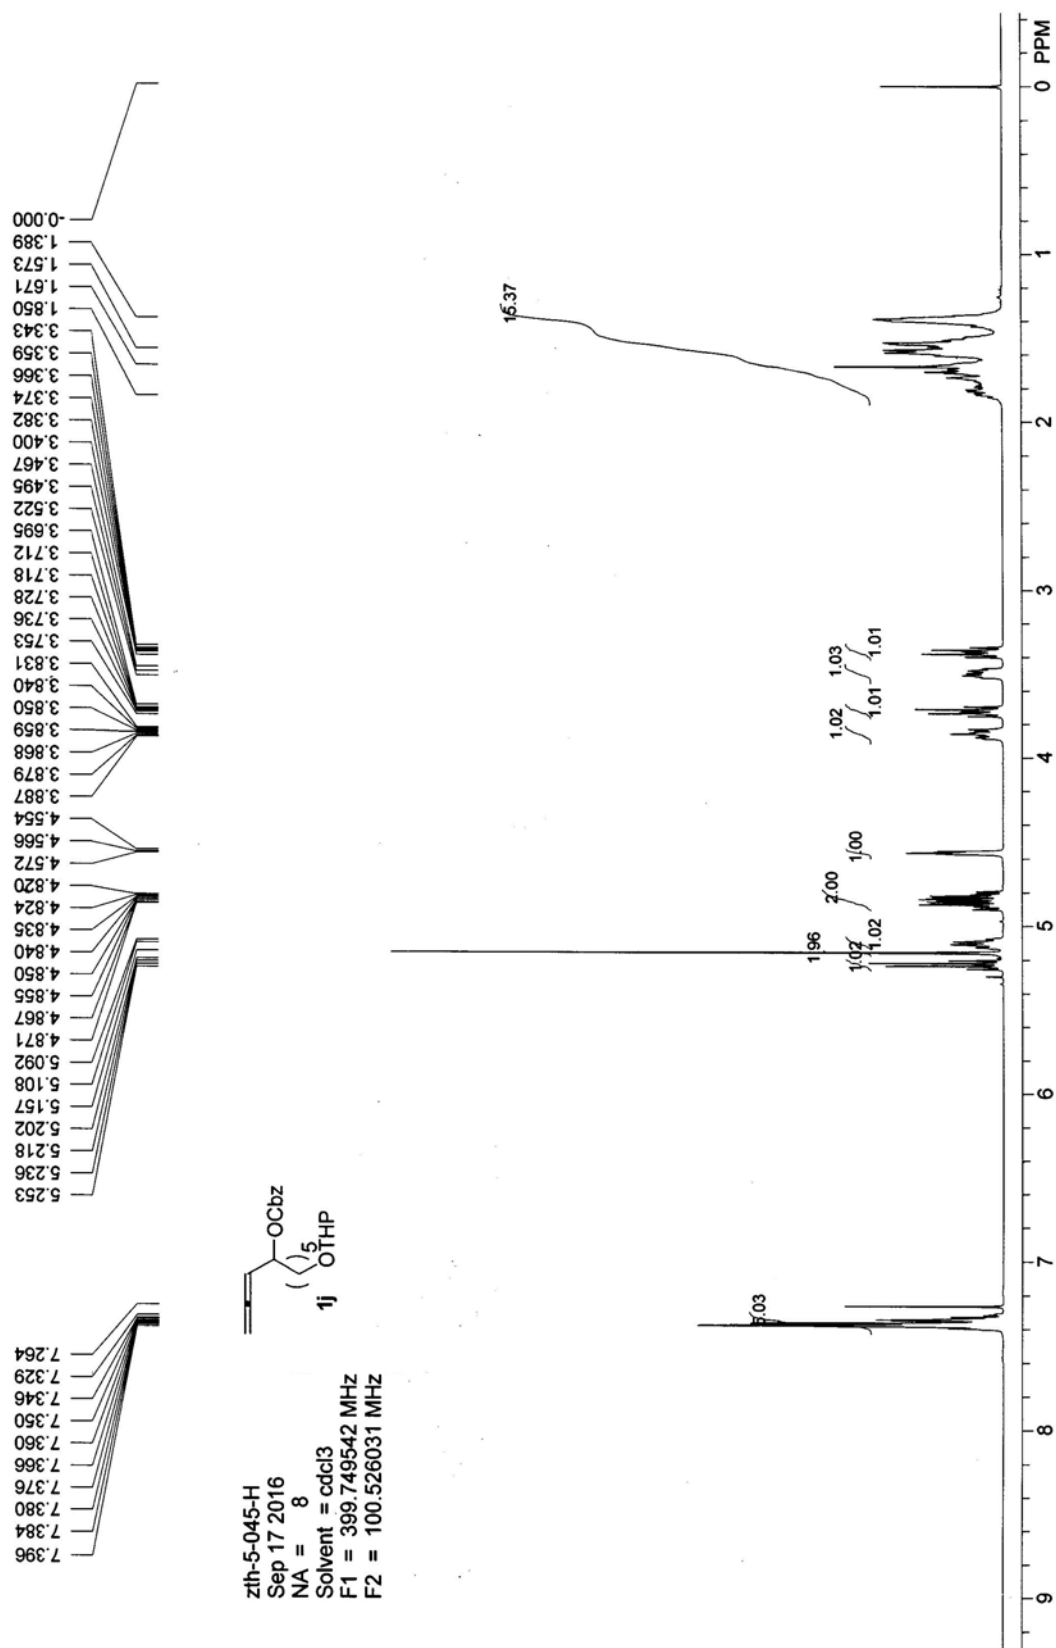

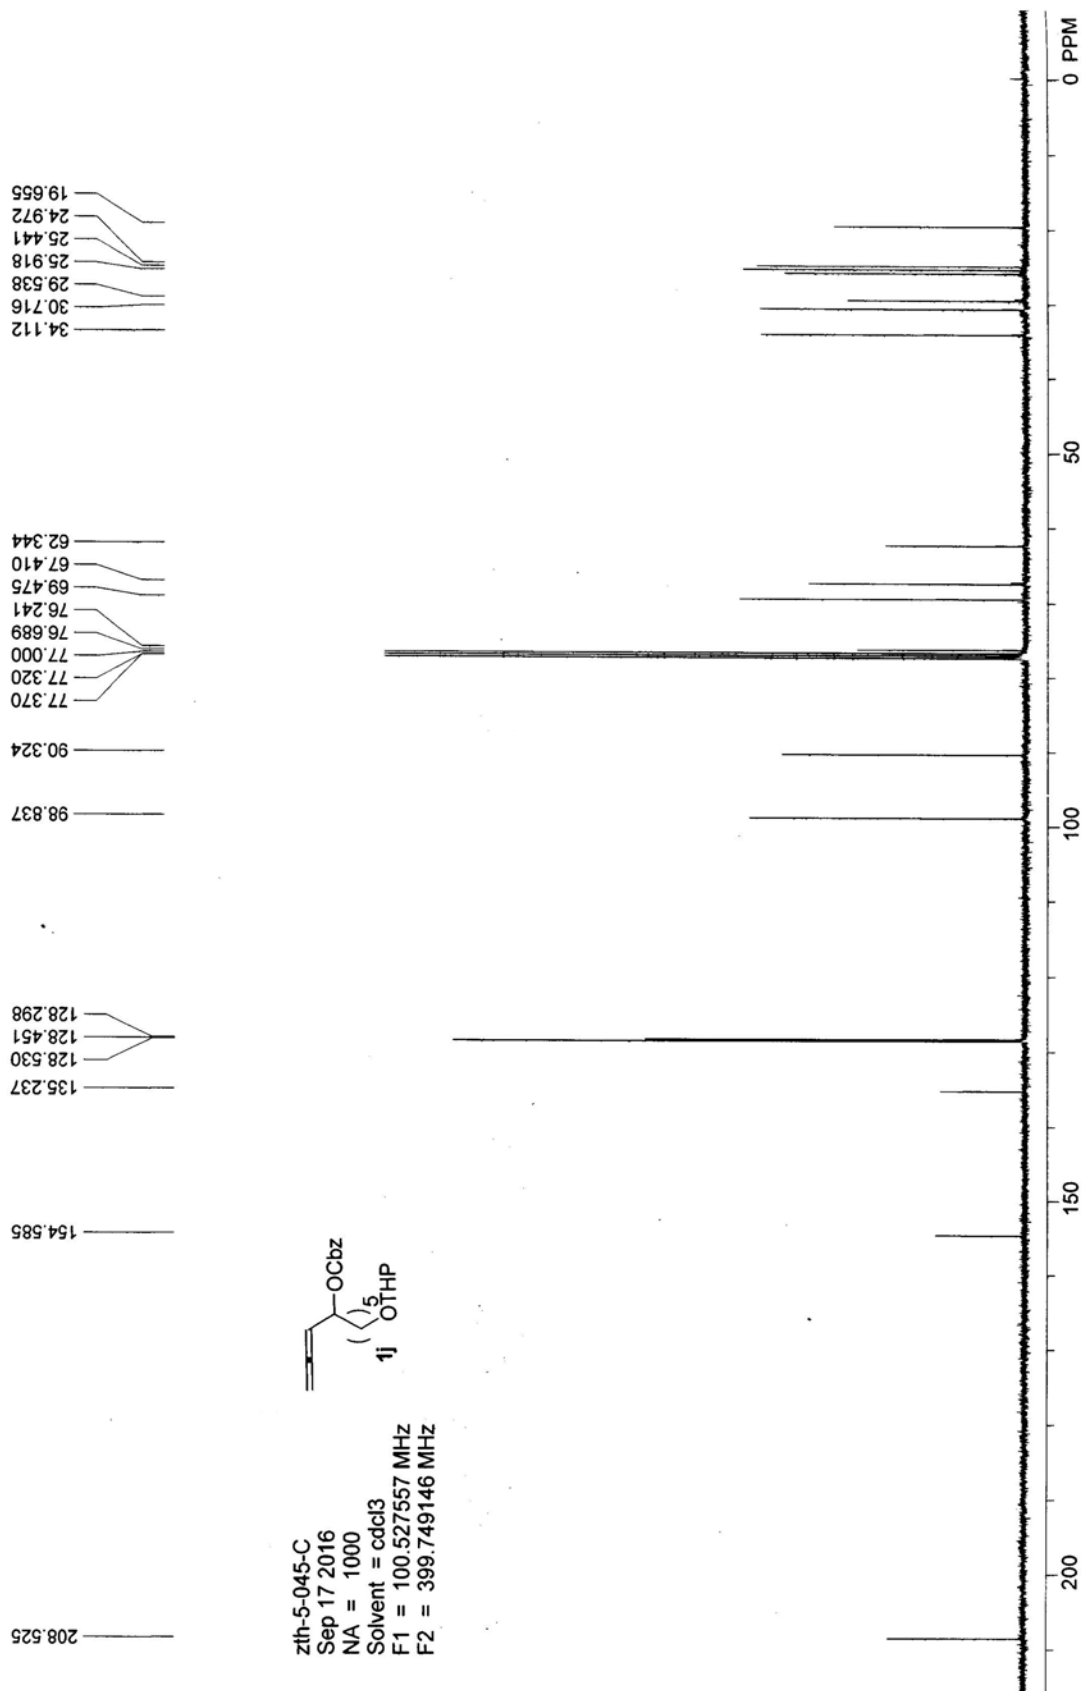

zlh-5-045-C  
 Sep 17 2016  
 NA = 1000  
 Solvent = cdcl3  
 F1 = 100.527557 MHz  
 F2 = 399.749146 MHz



## benzyl 1-(benzyloxy)penta-3,4-dien-2-yl carbonate (1k, zth-5-099)

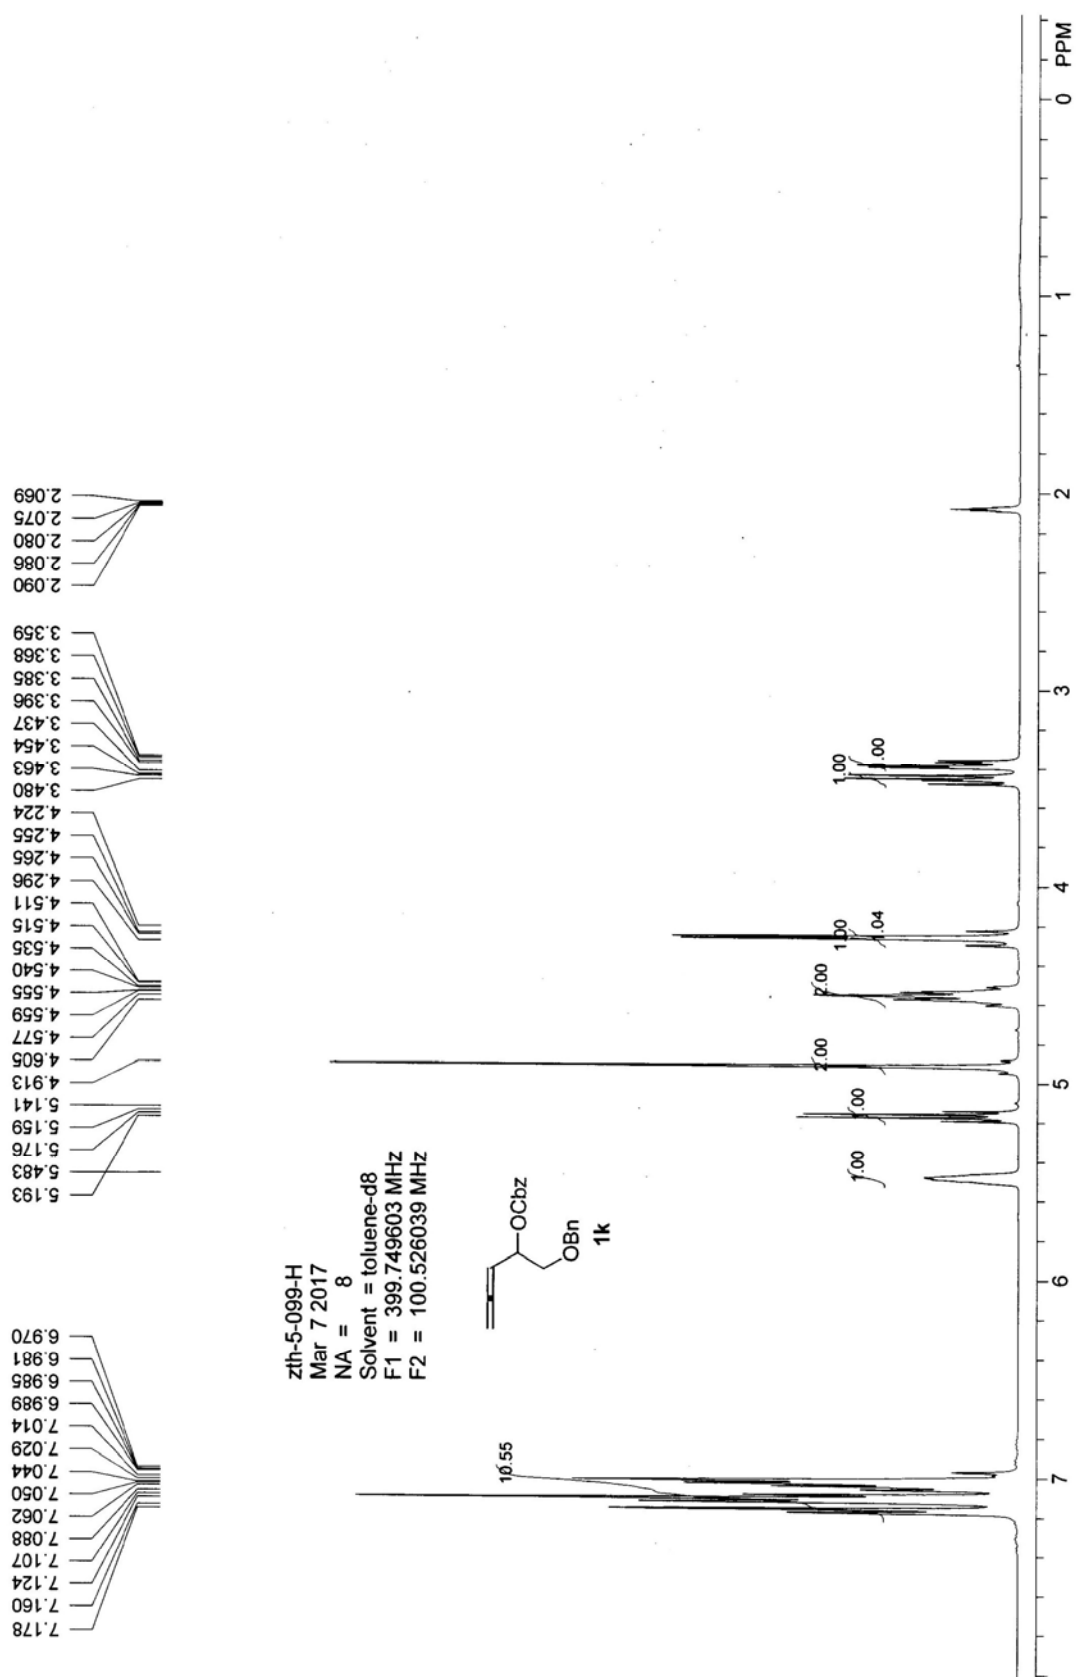

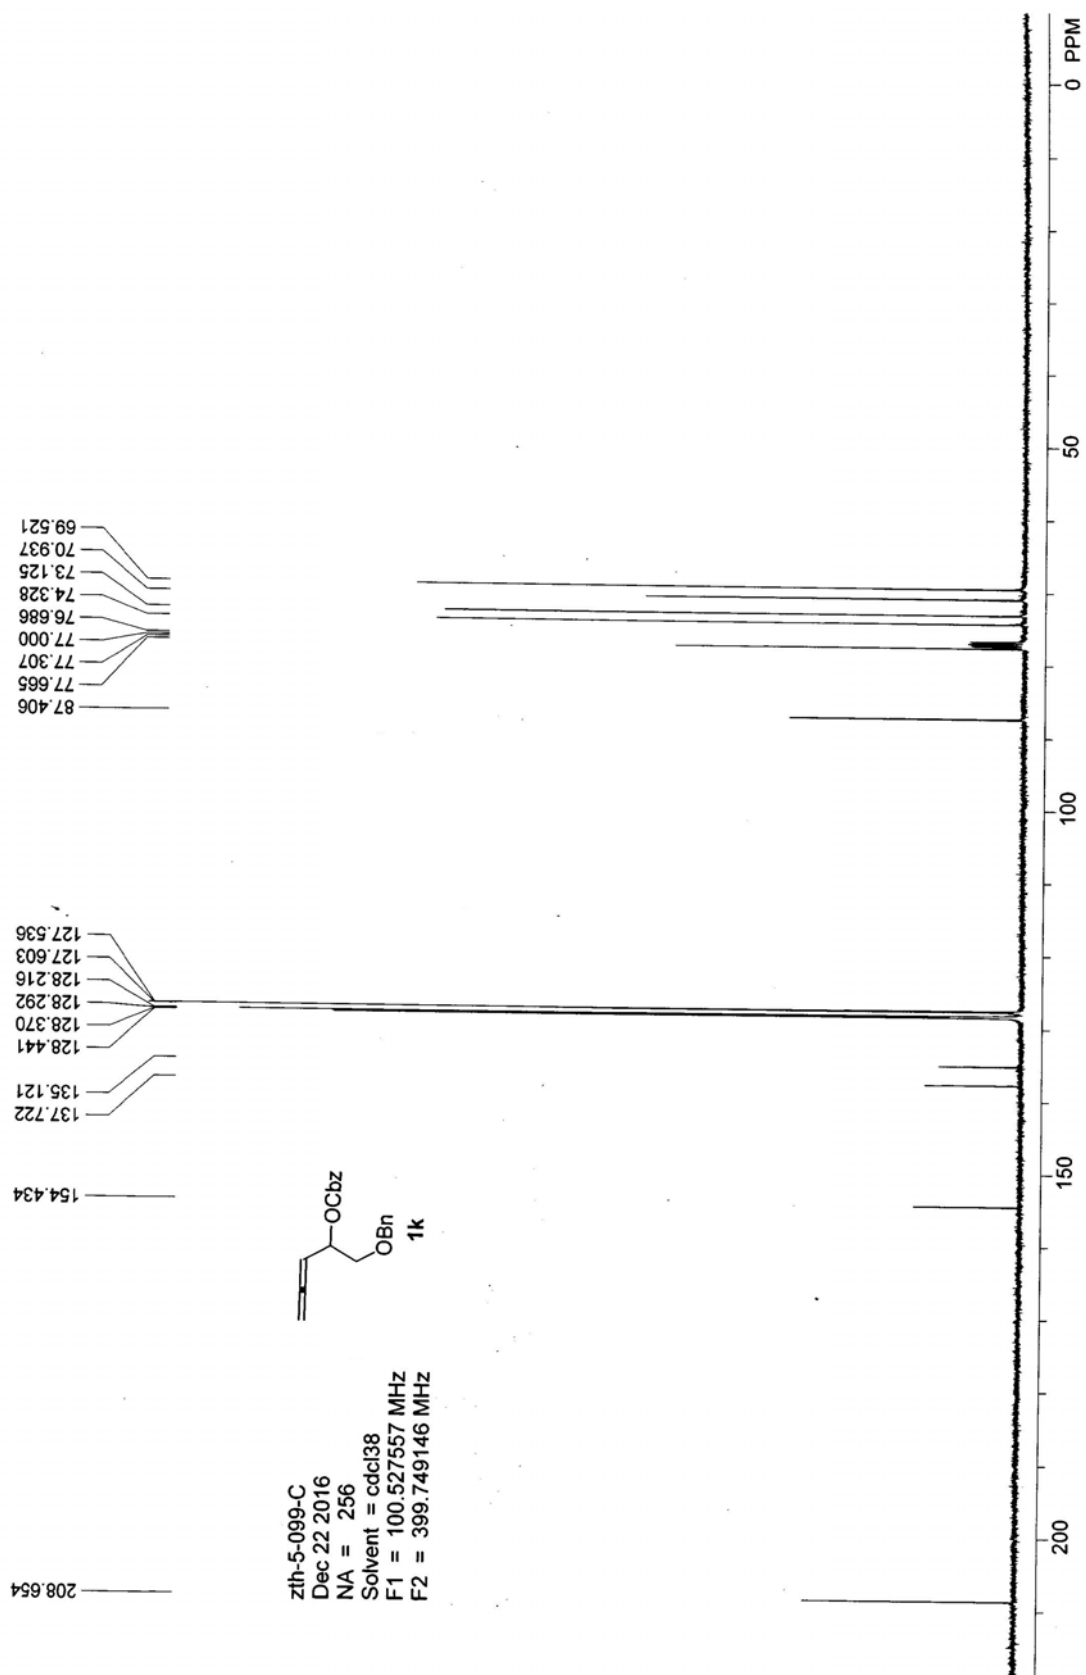

benzyl 1-(benzyloxy)penta-3,4-dien-2-yl carbonate (11, zth-5-044)

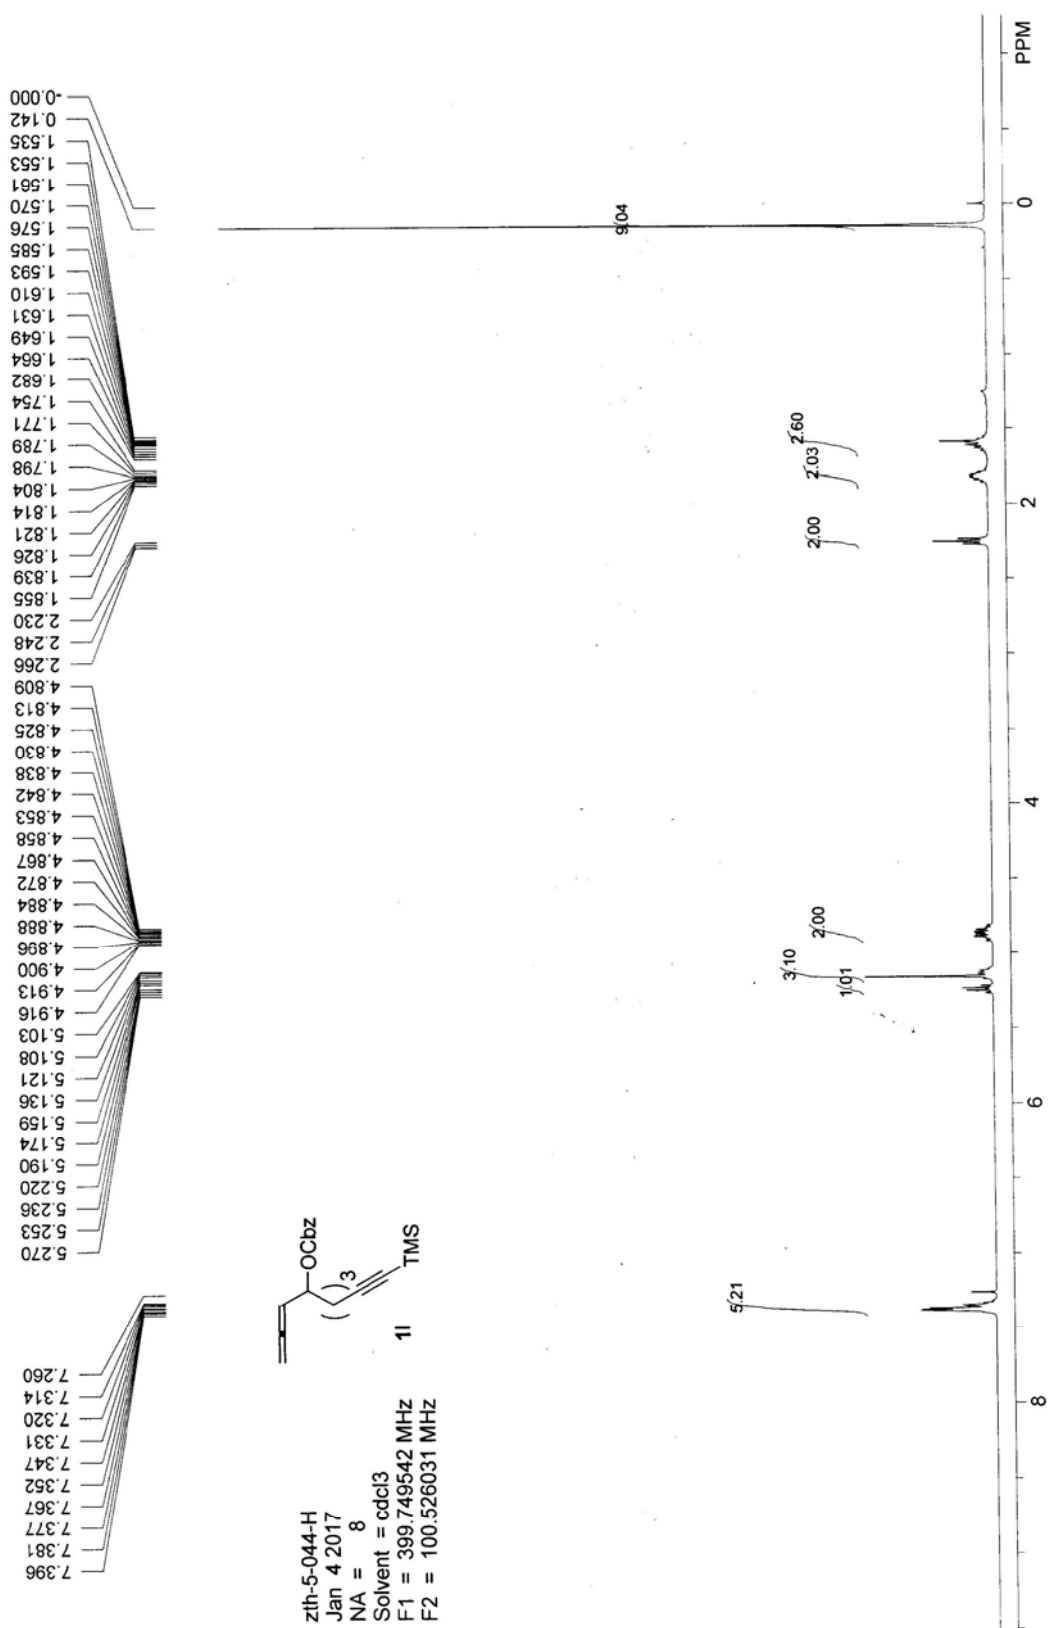

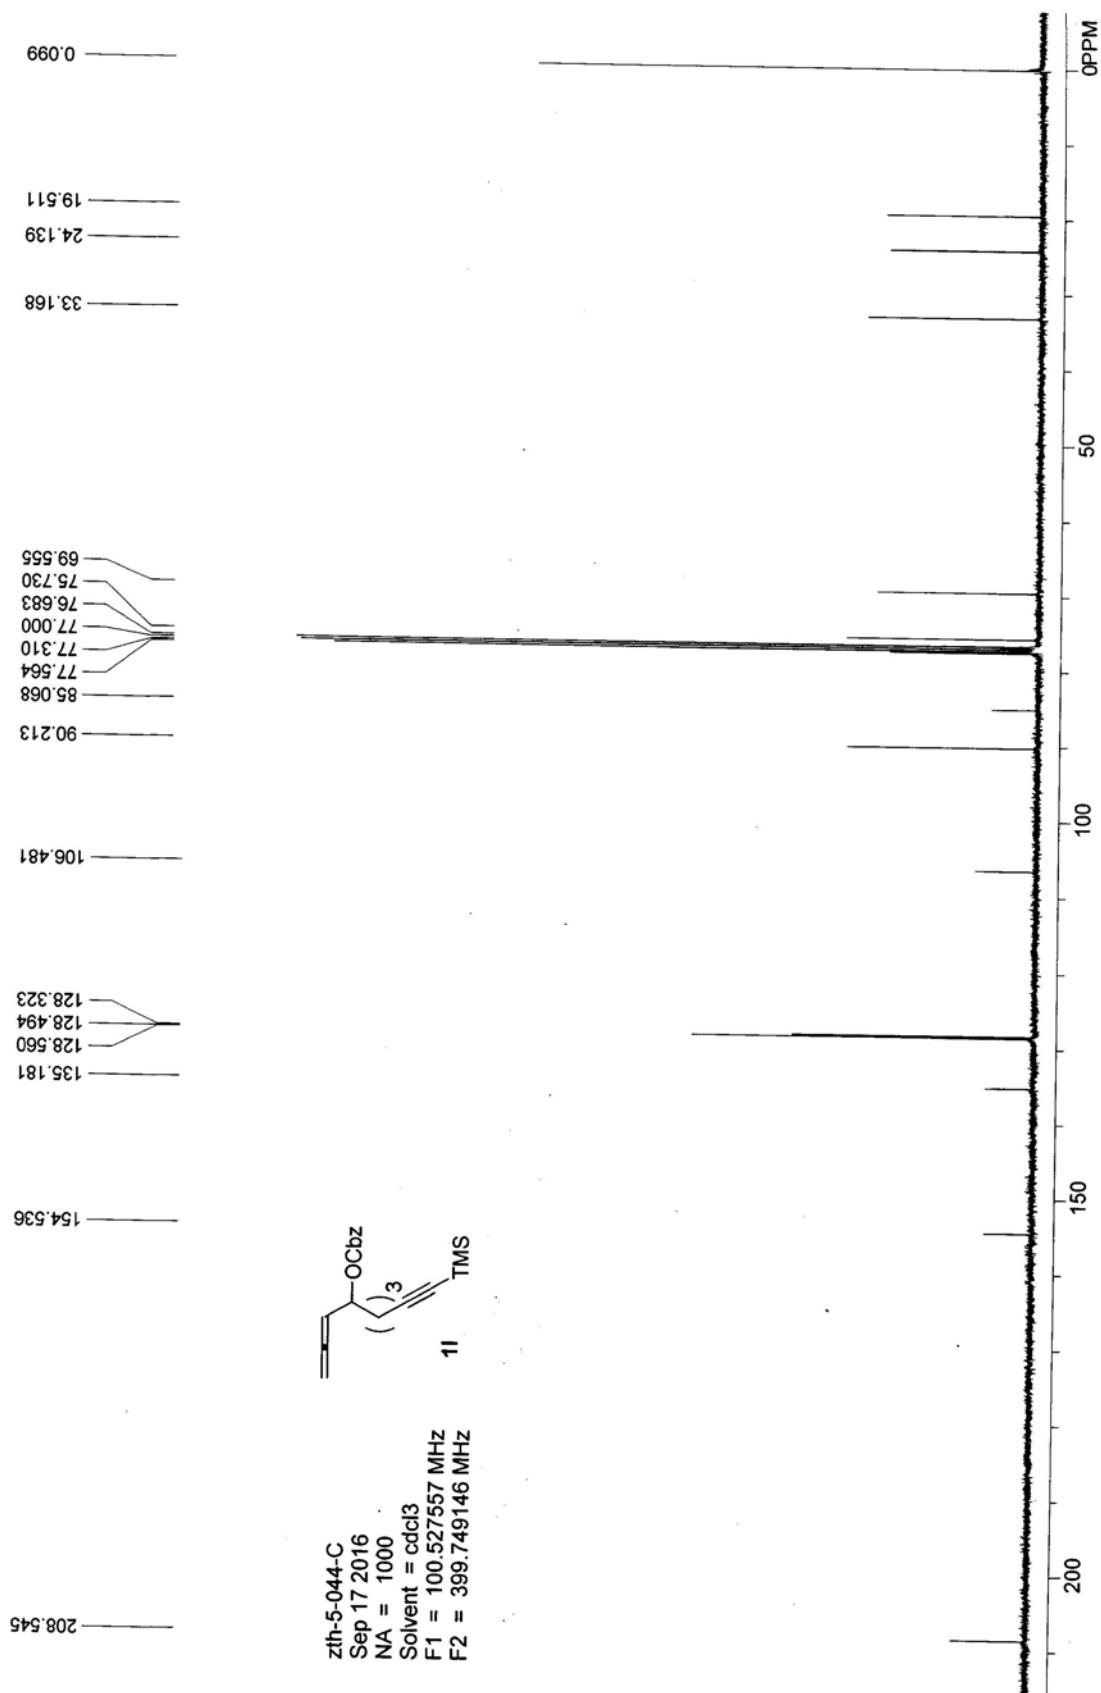

***tert*-butyl nona-1,2-dien-4-yl carbonate (1d, zth-6-122)**

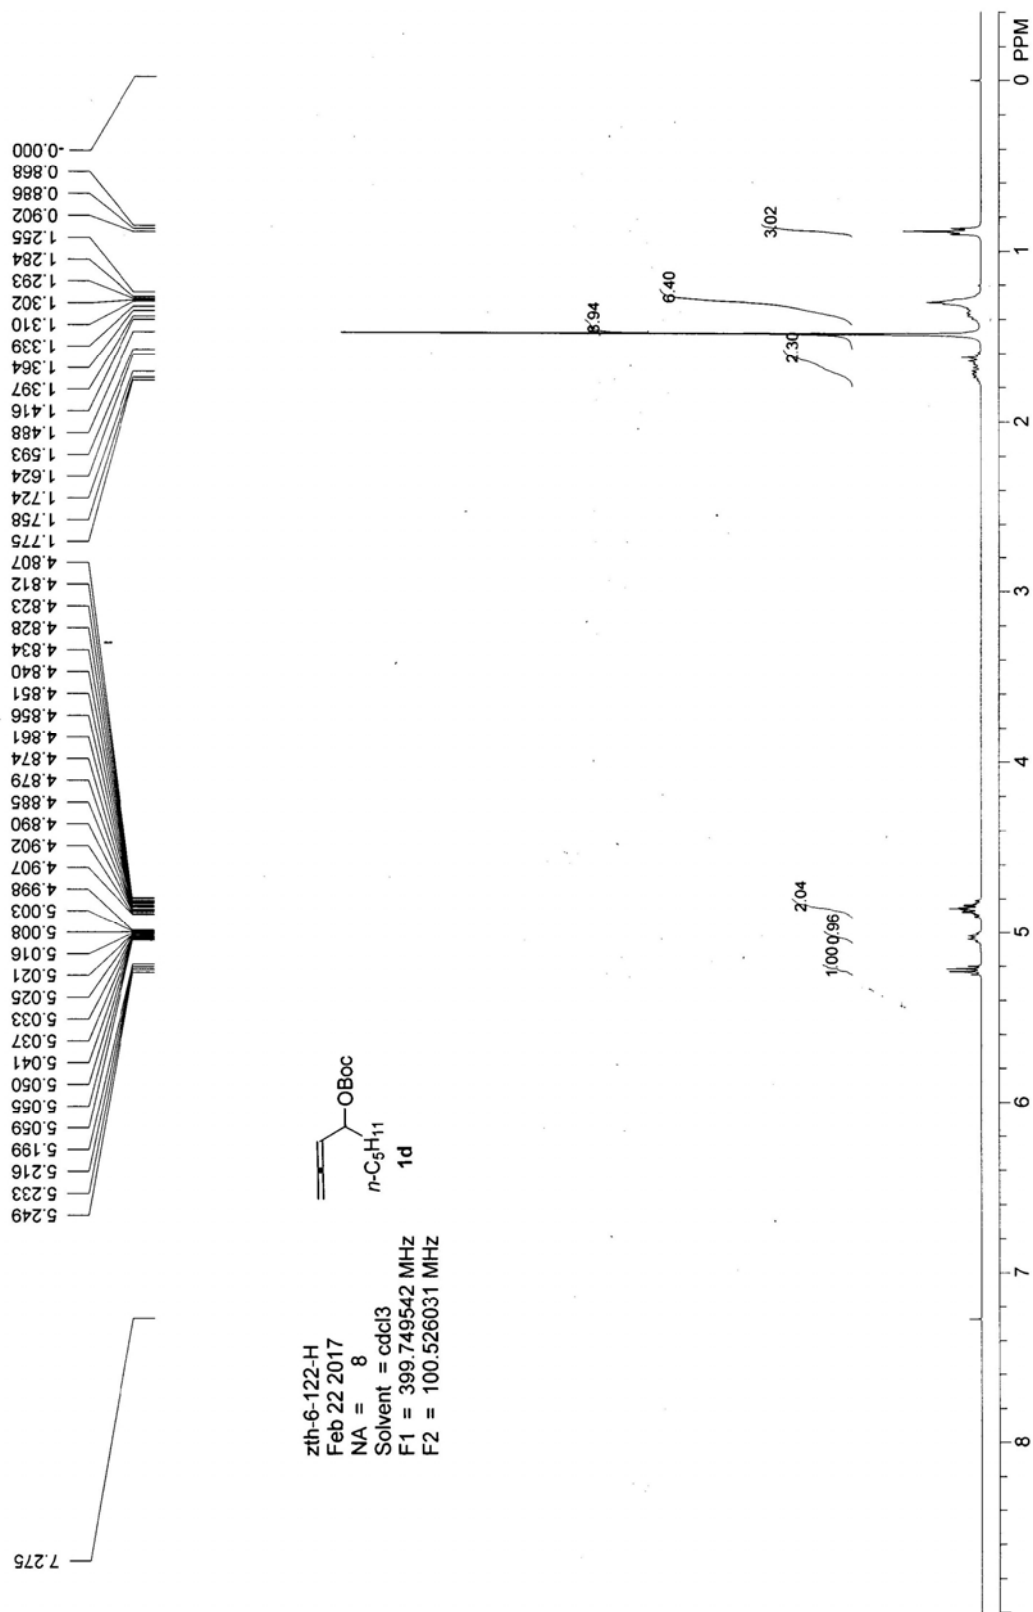

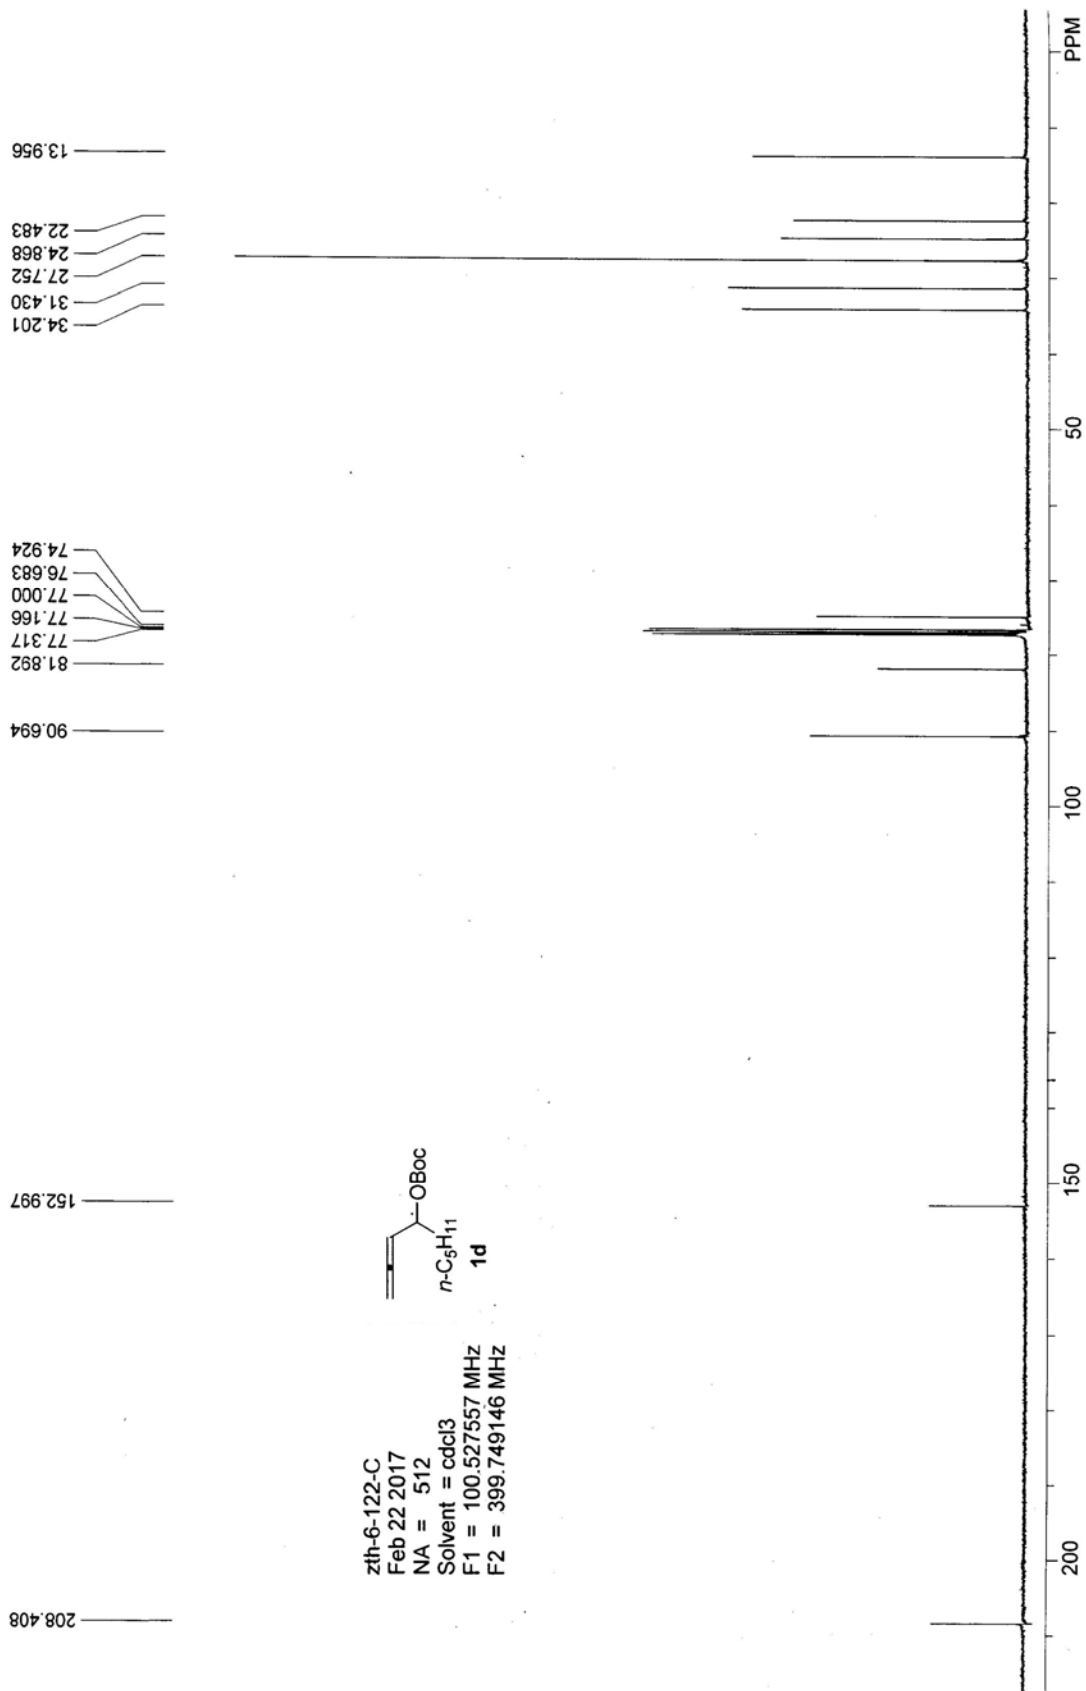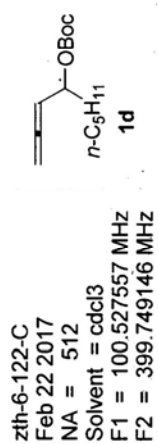

***tert*-butyl 1-(4-fluorophenyl)buta-2,3-dienyl carbonate (1n, zth-5-091)**

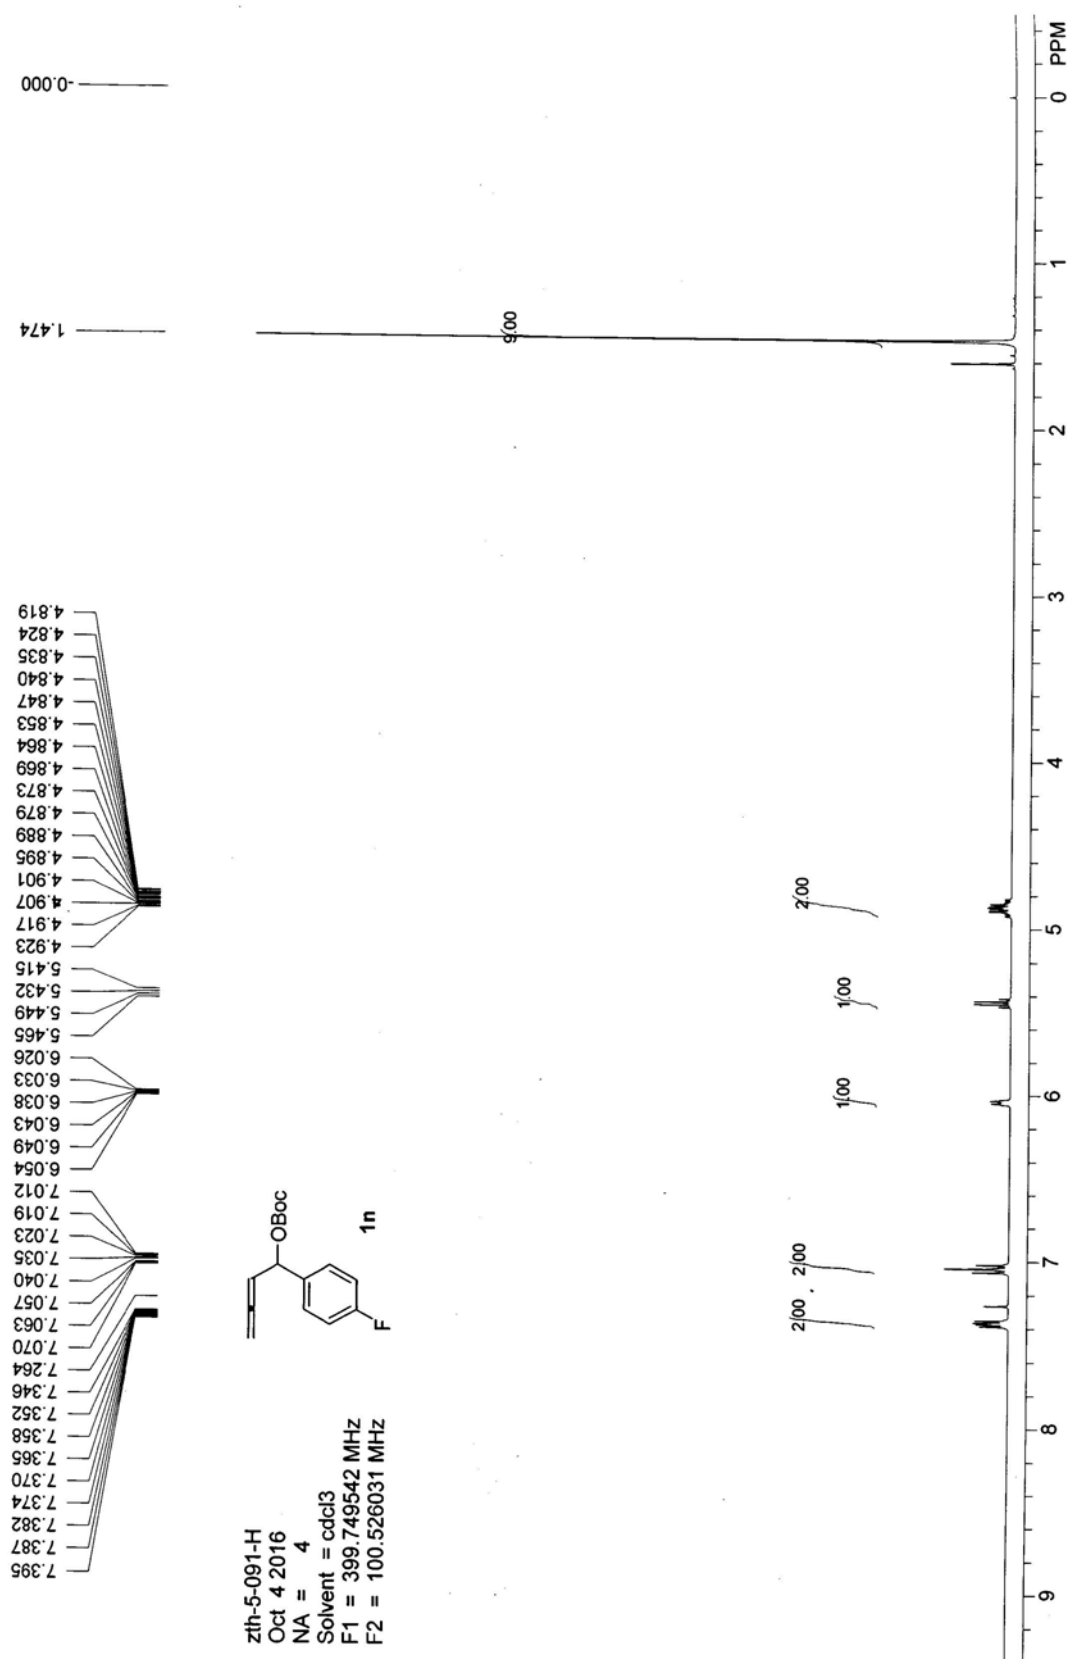

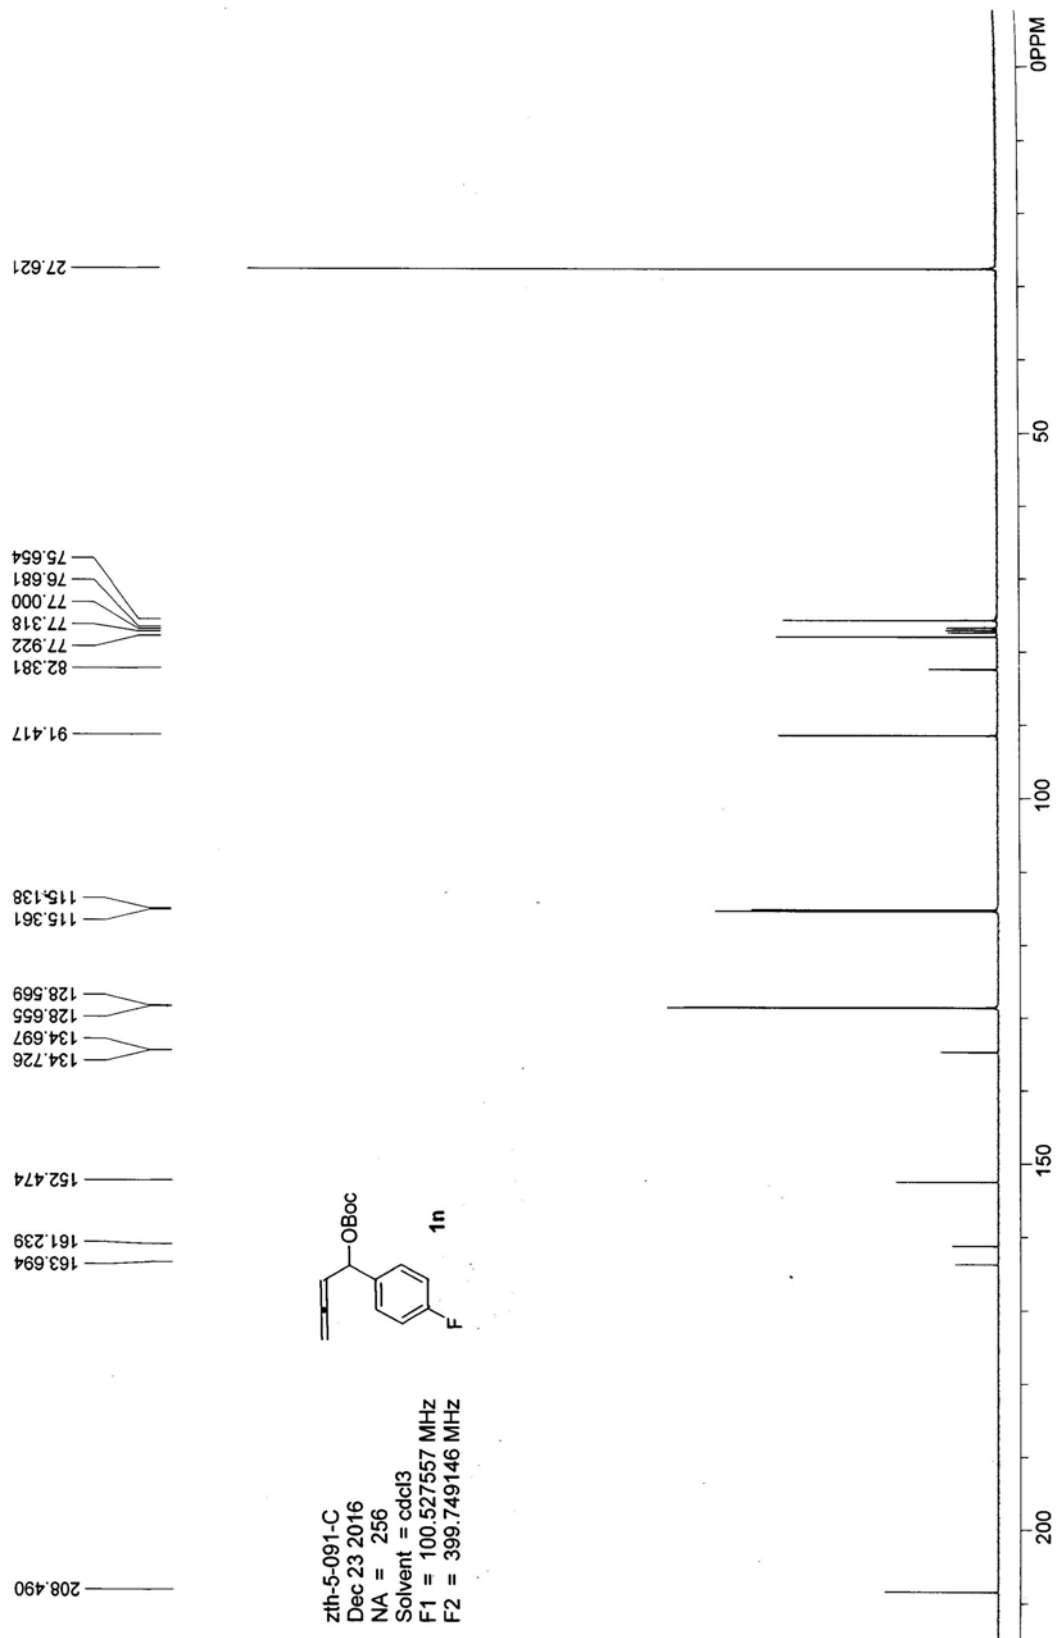





***tert*-butyl 1-(4-fluorophenyl)buta-2,3-dienyl carbonate (1o, zth-4-118)**

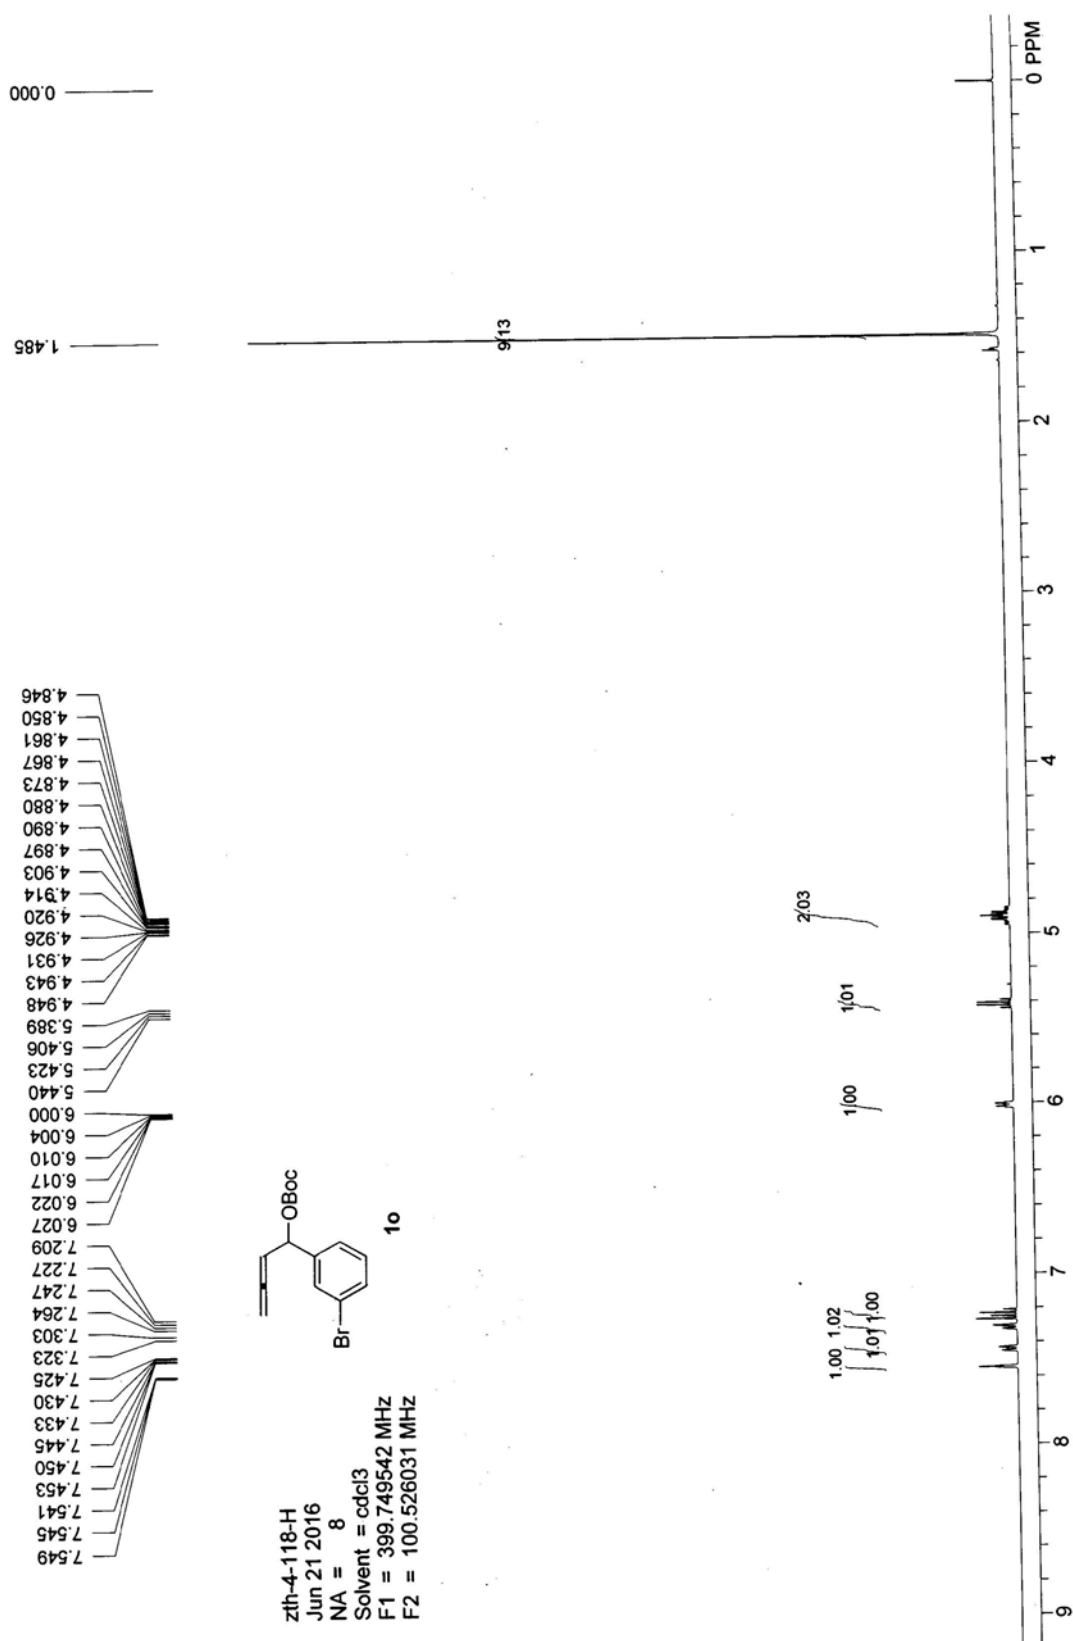

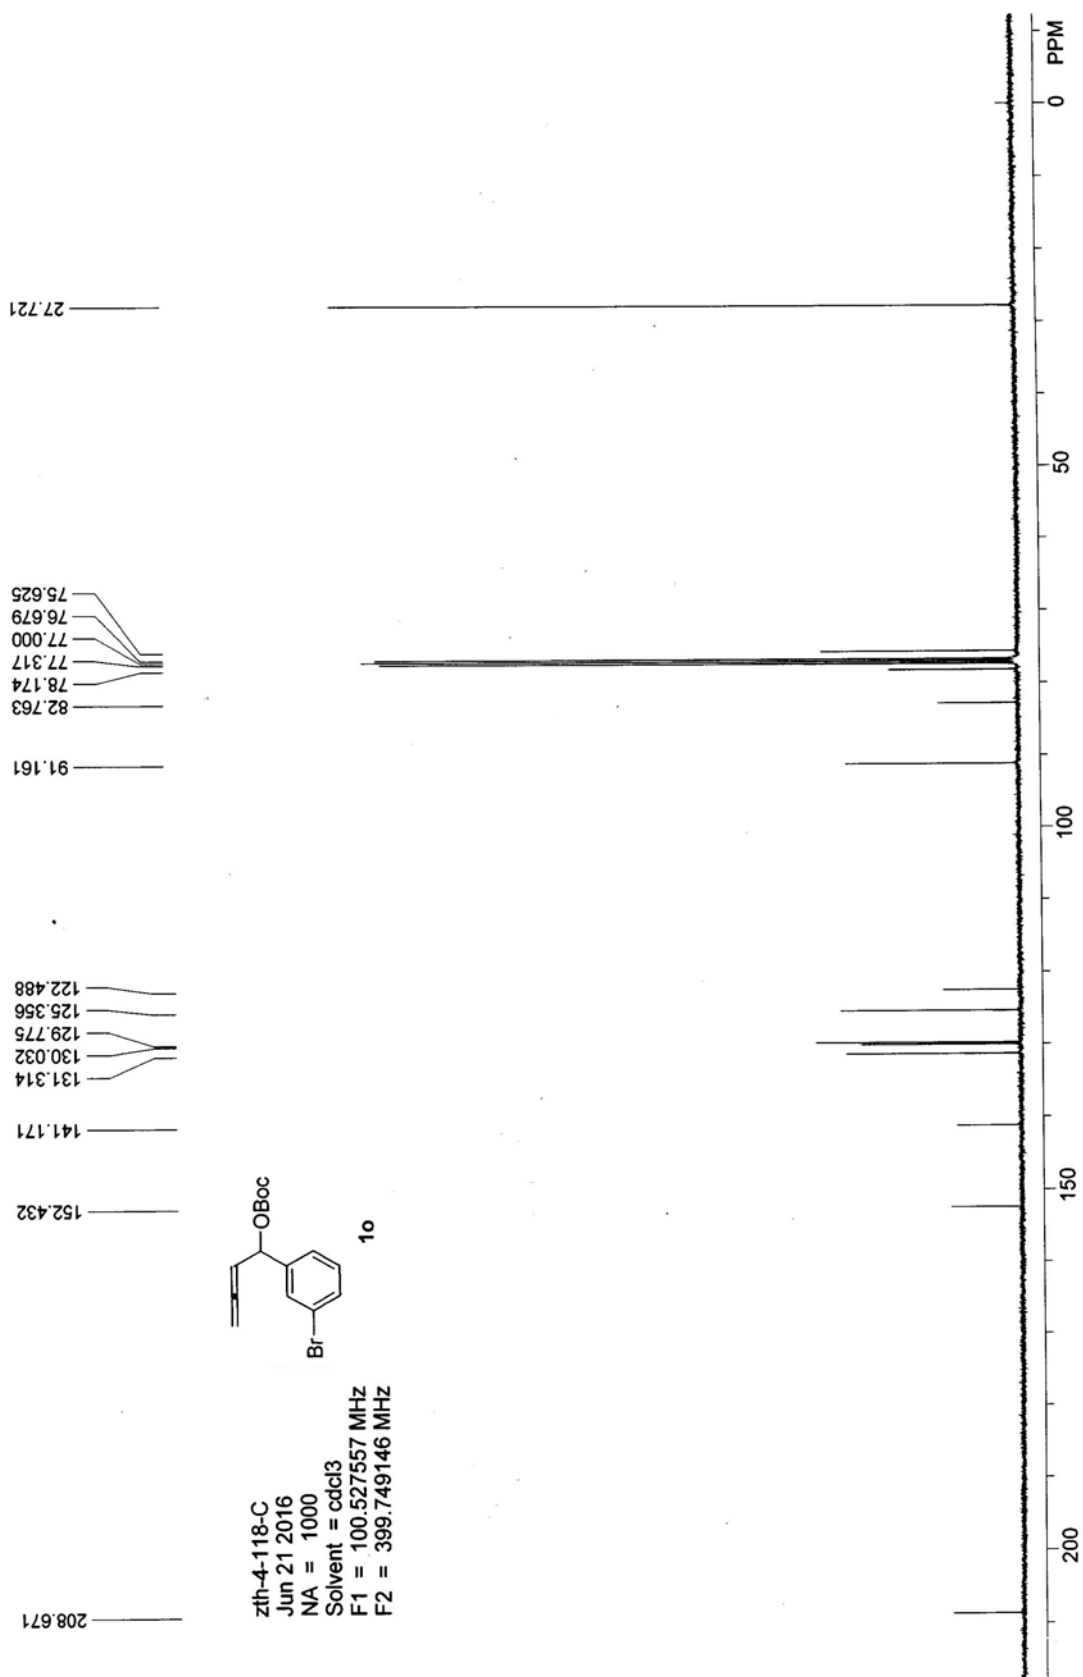

***tert*-butyl 1-(4-bromophenyl)buta-2,3-dienyl carbonate (1p, zth-4-106)**

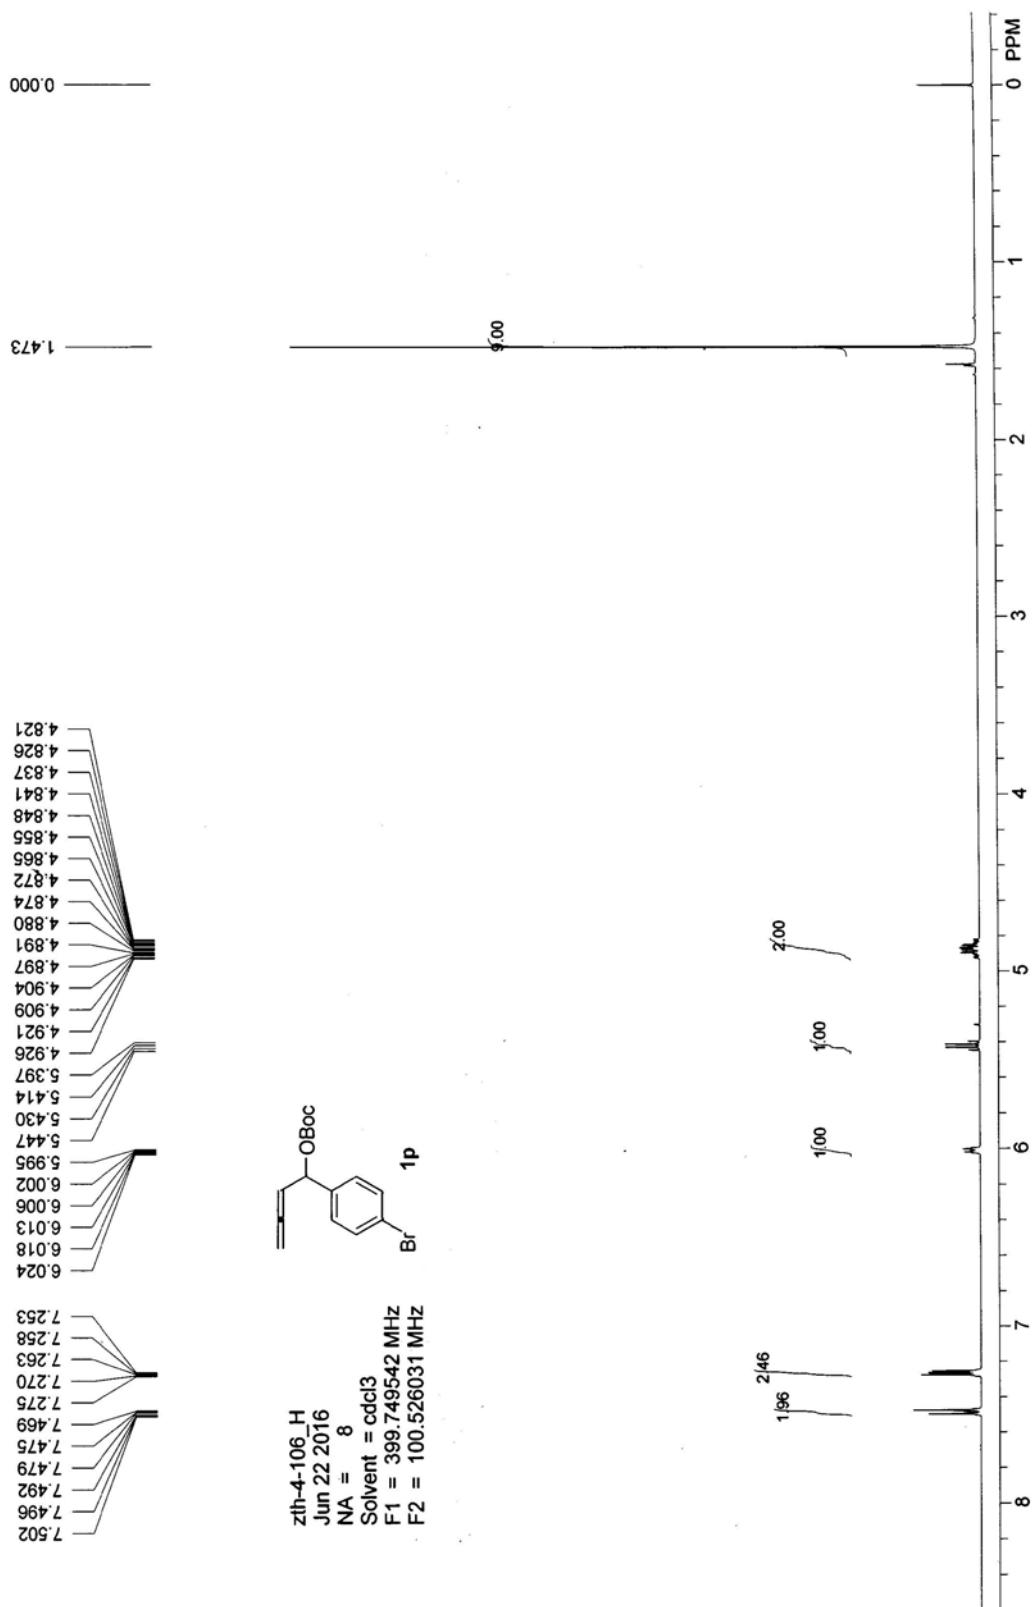

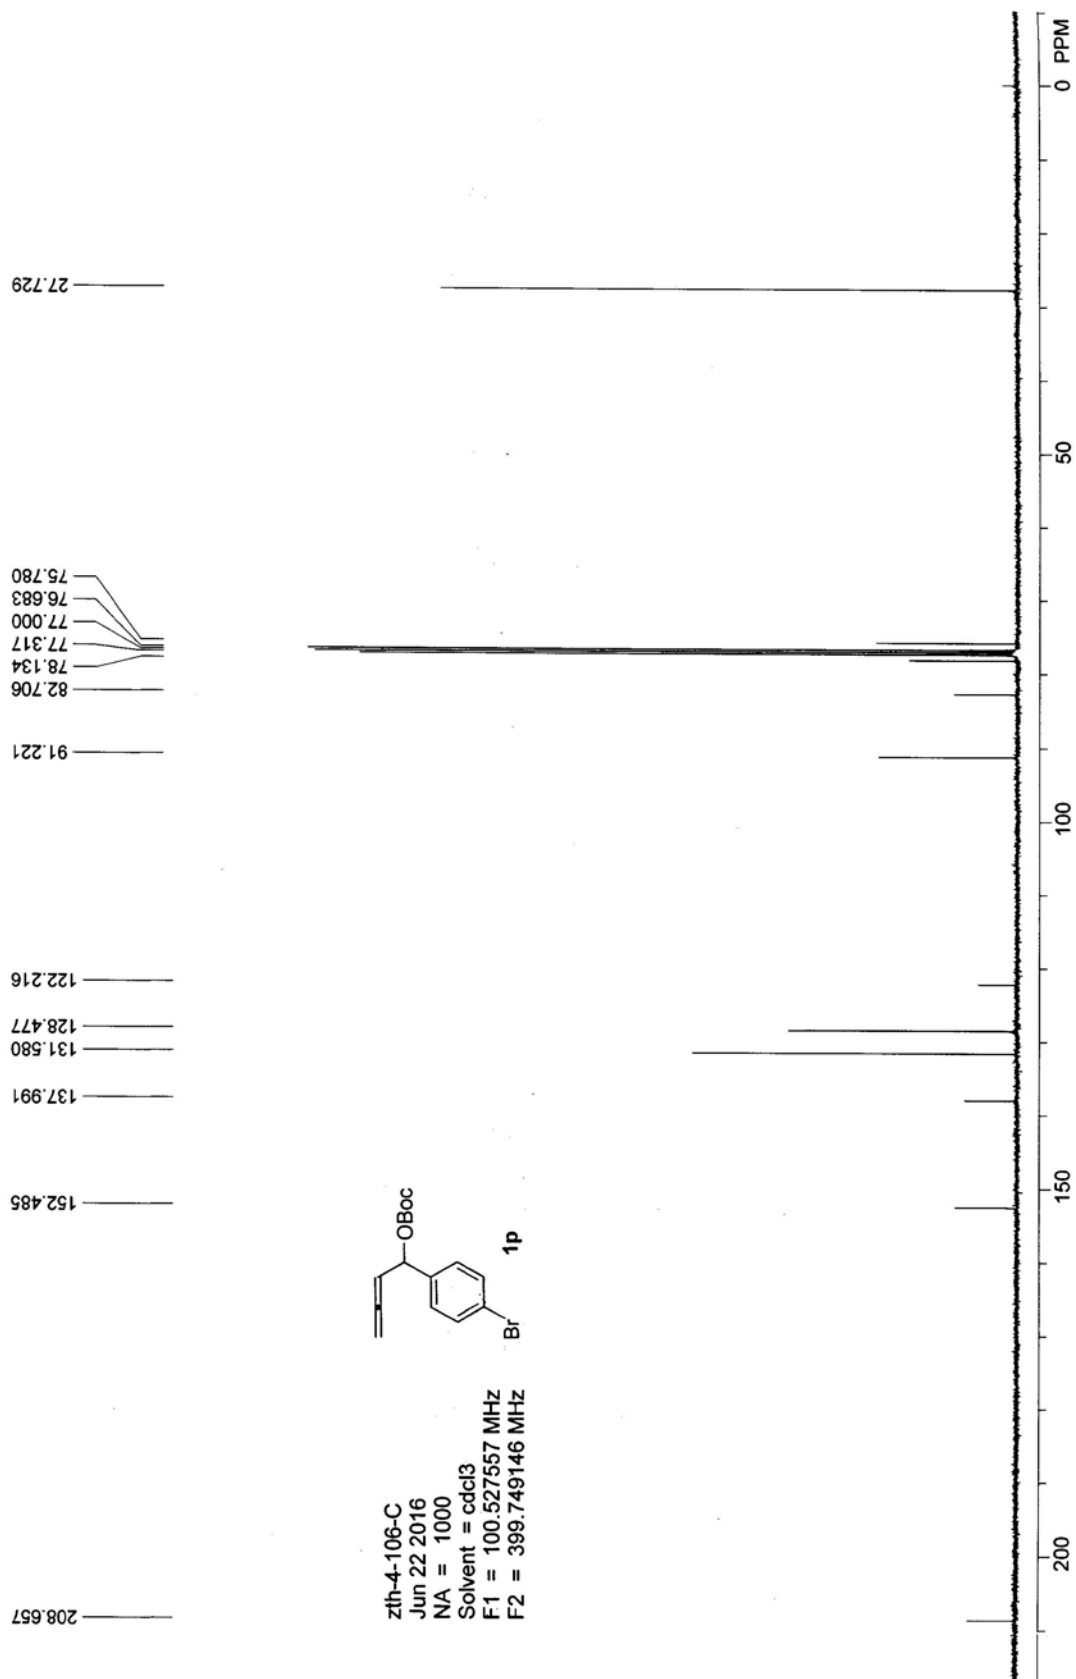

***tert*-butyl 1-(4-methoxycarbonylphenyl)buta-2,3-dienyl carbonate (1q, zth-4-120)**

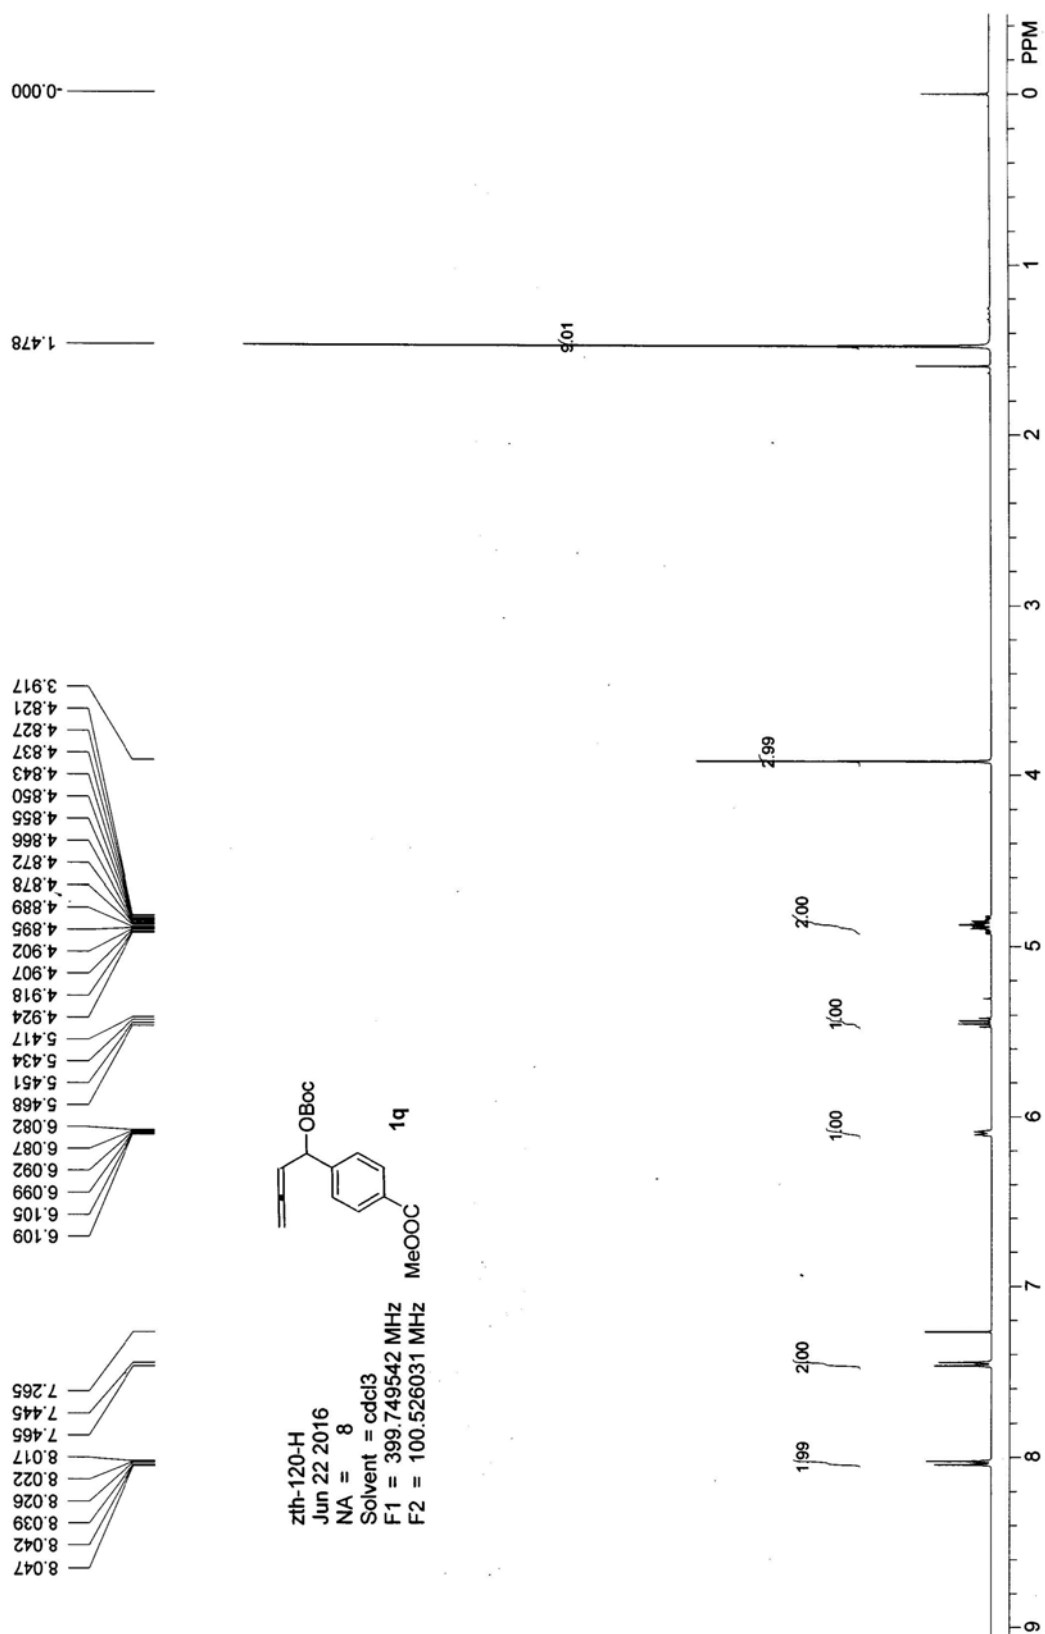

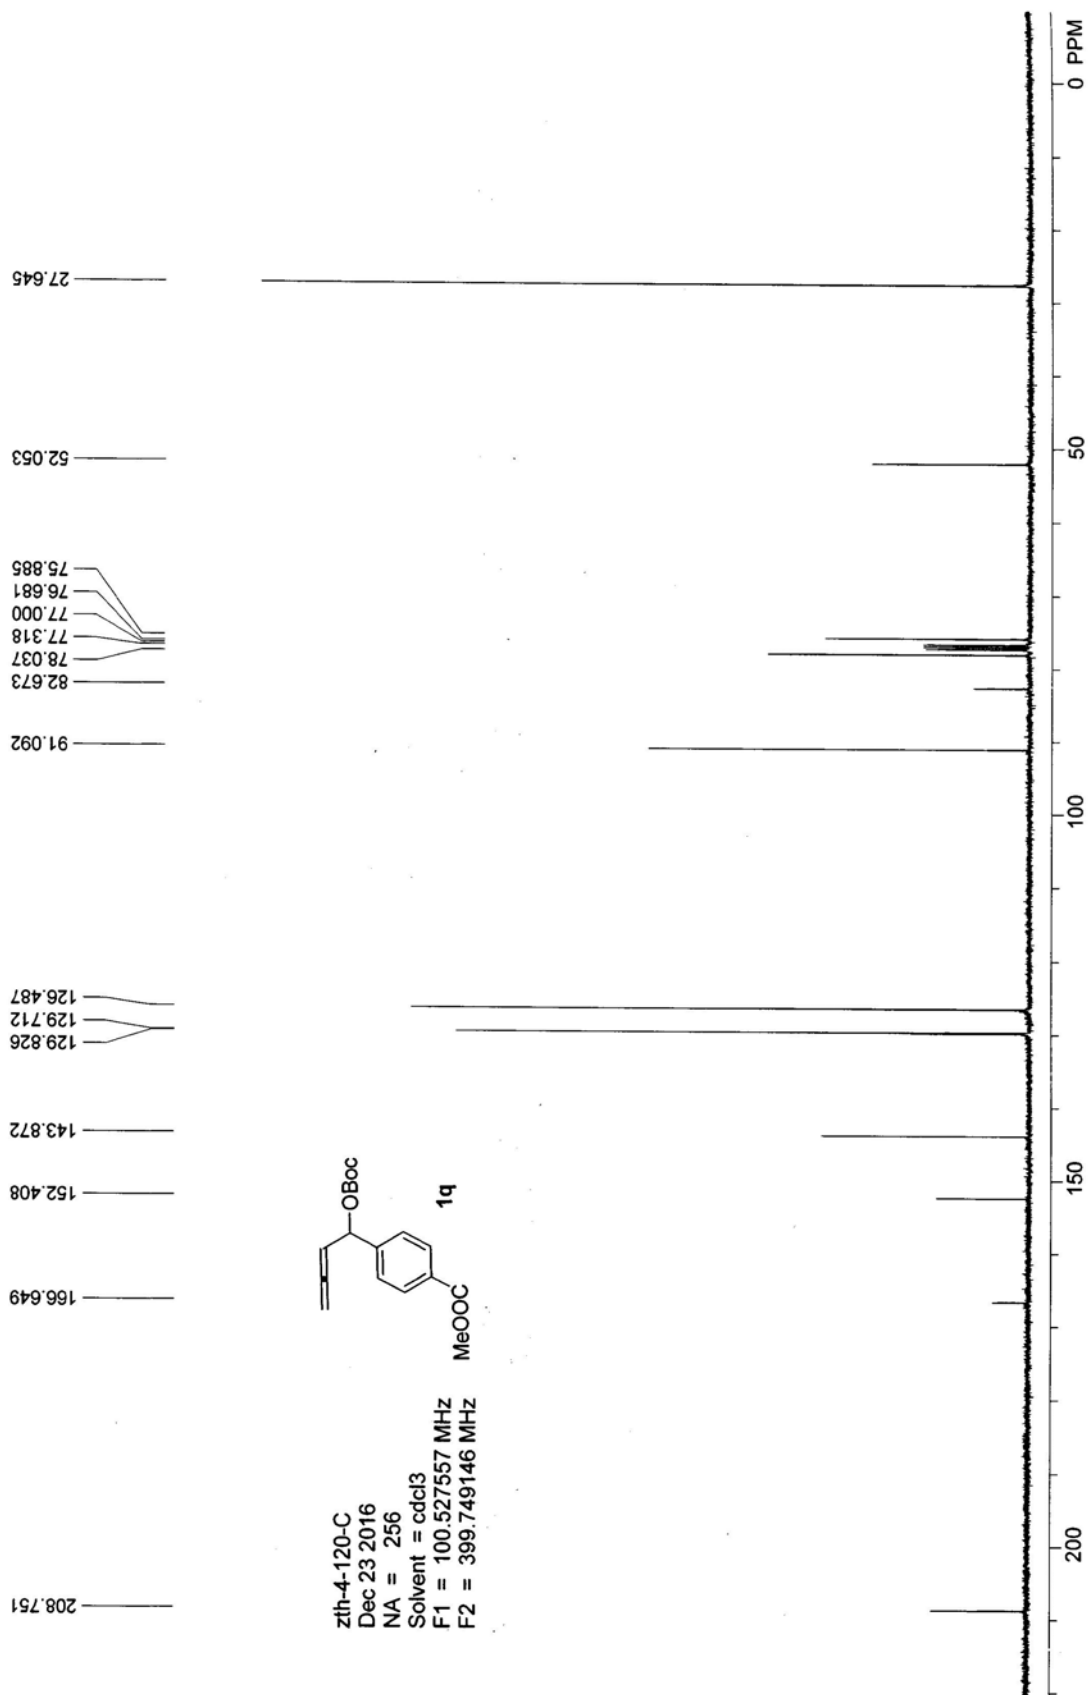

***tert*-butyl 1-(3-cyanophenyl)buta-2,3-dienyl carbonate (1r, zth-4-121)**

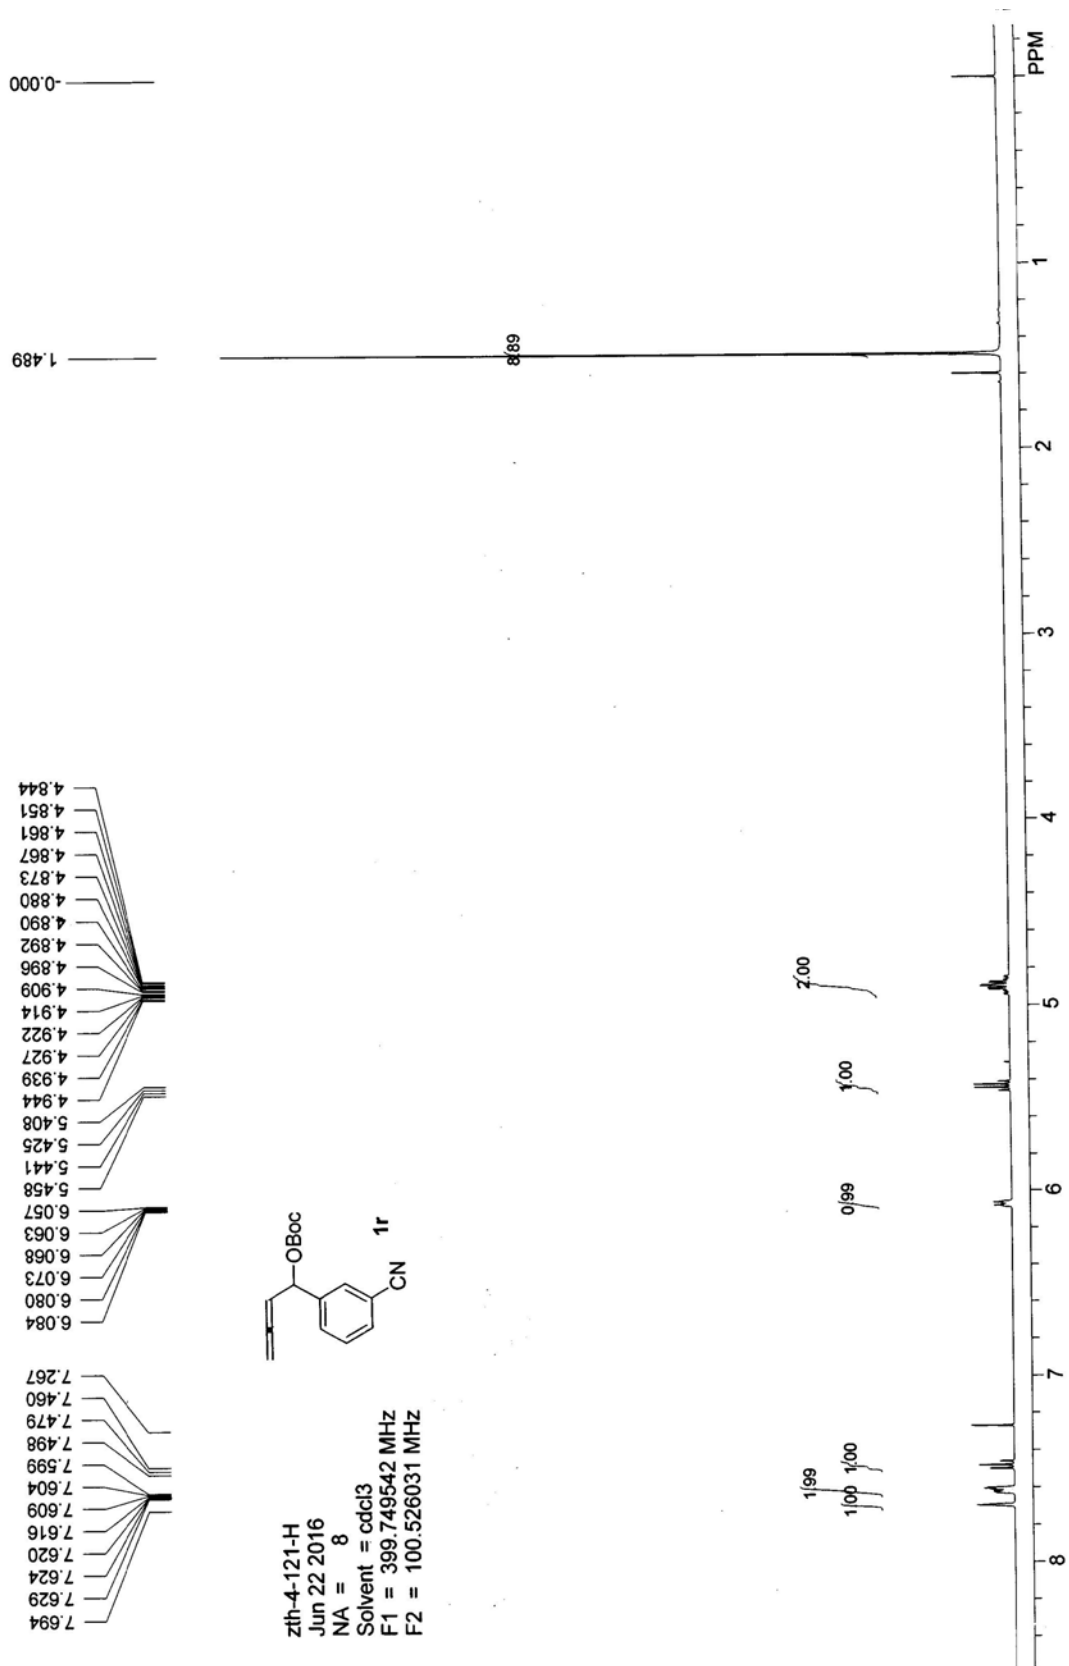



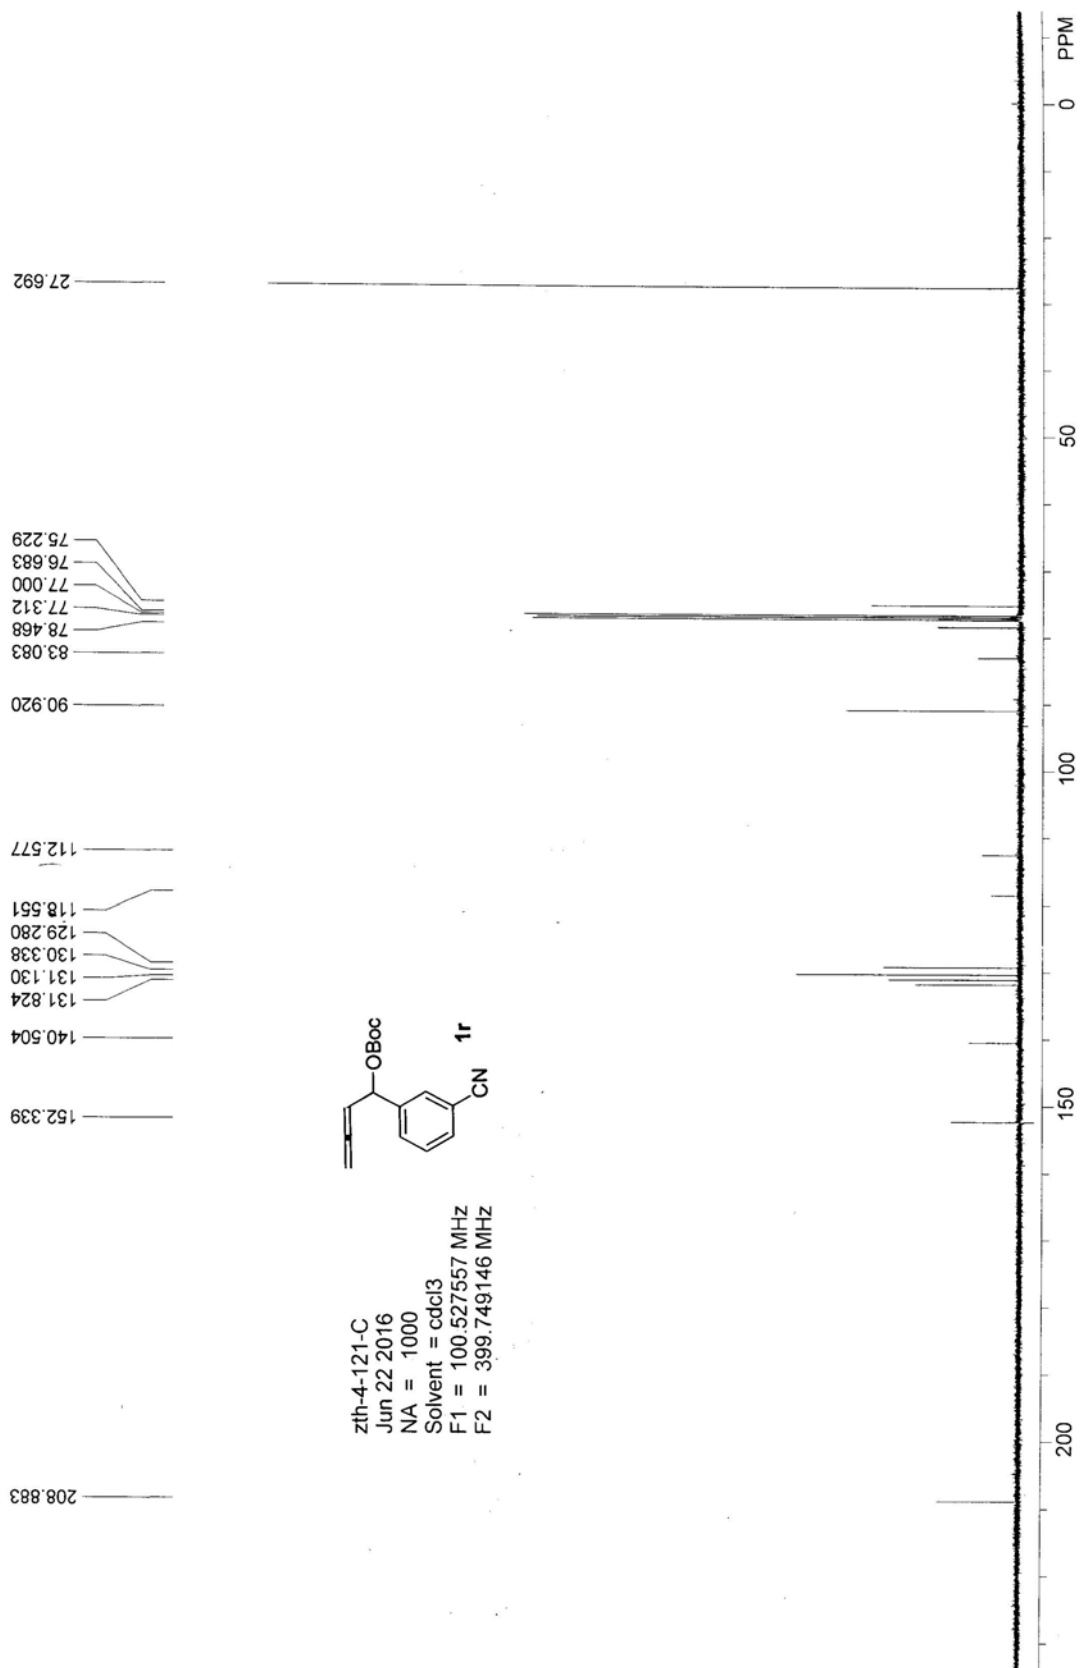

zth-4-121-C  
 Jun 22 2016  
 NA = 1000  
 Solvent = cdcl3  
 F1 = 100.527557 MHz  
 F2 = 399.749146 MHz

***tert*-butyl dodeca-1,2-dien-5-yn-4-yl carbonate (1s, zth-5-089)**

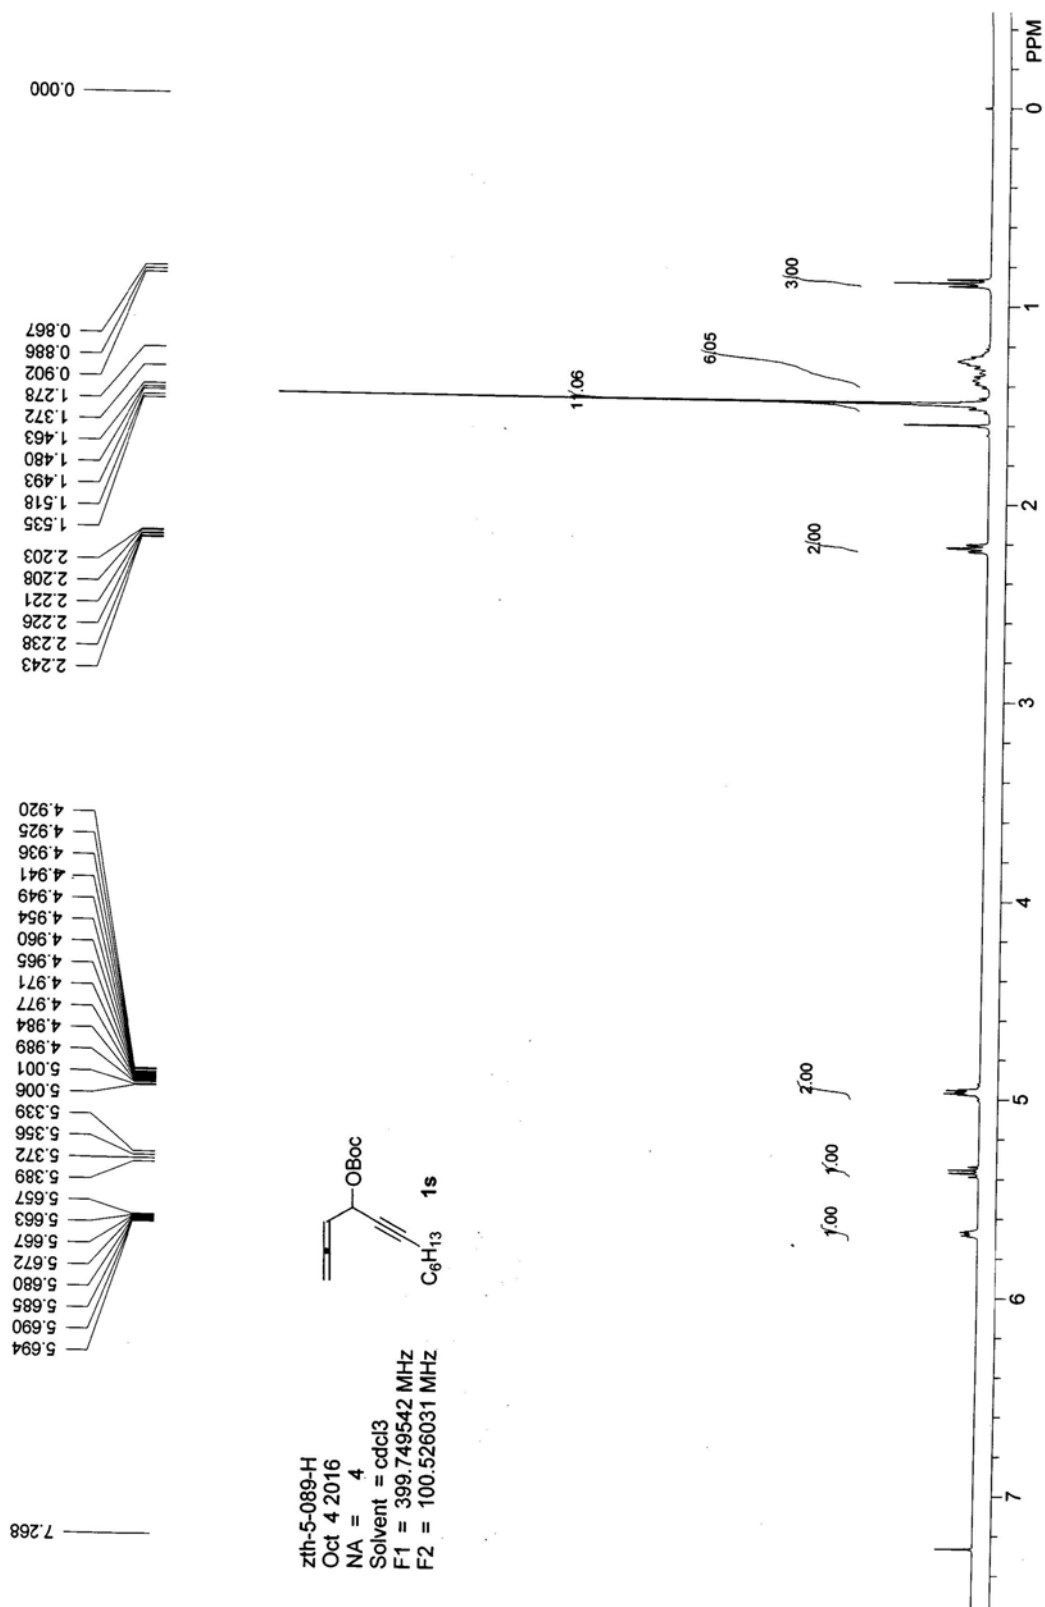

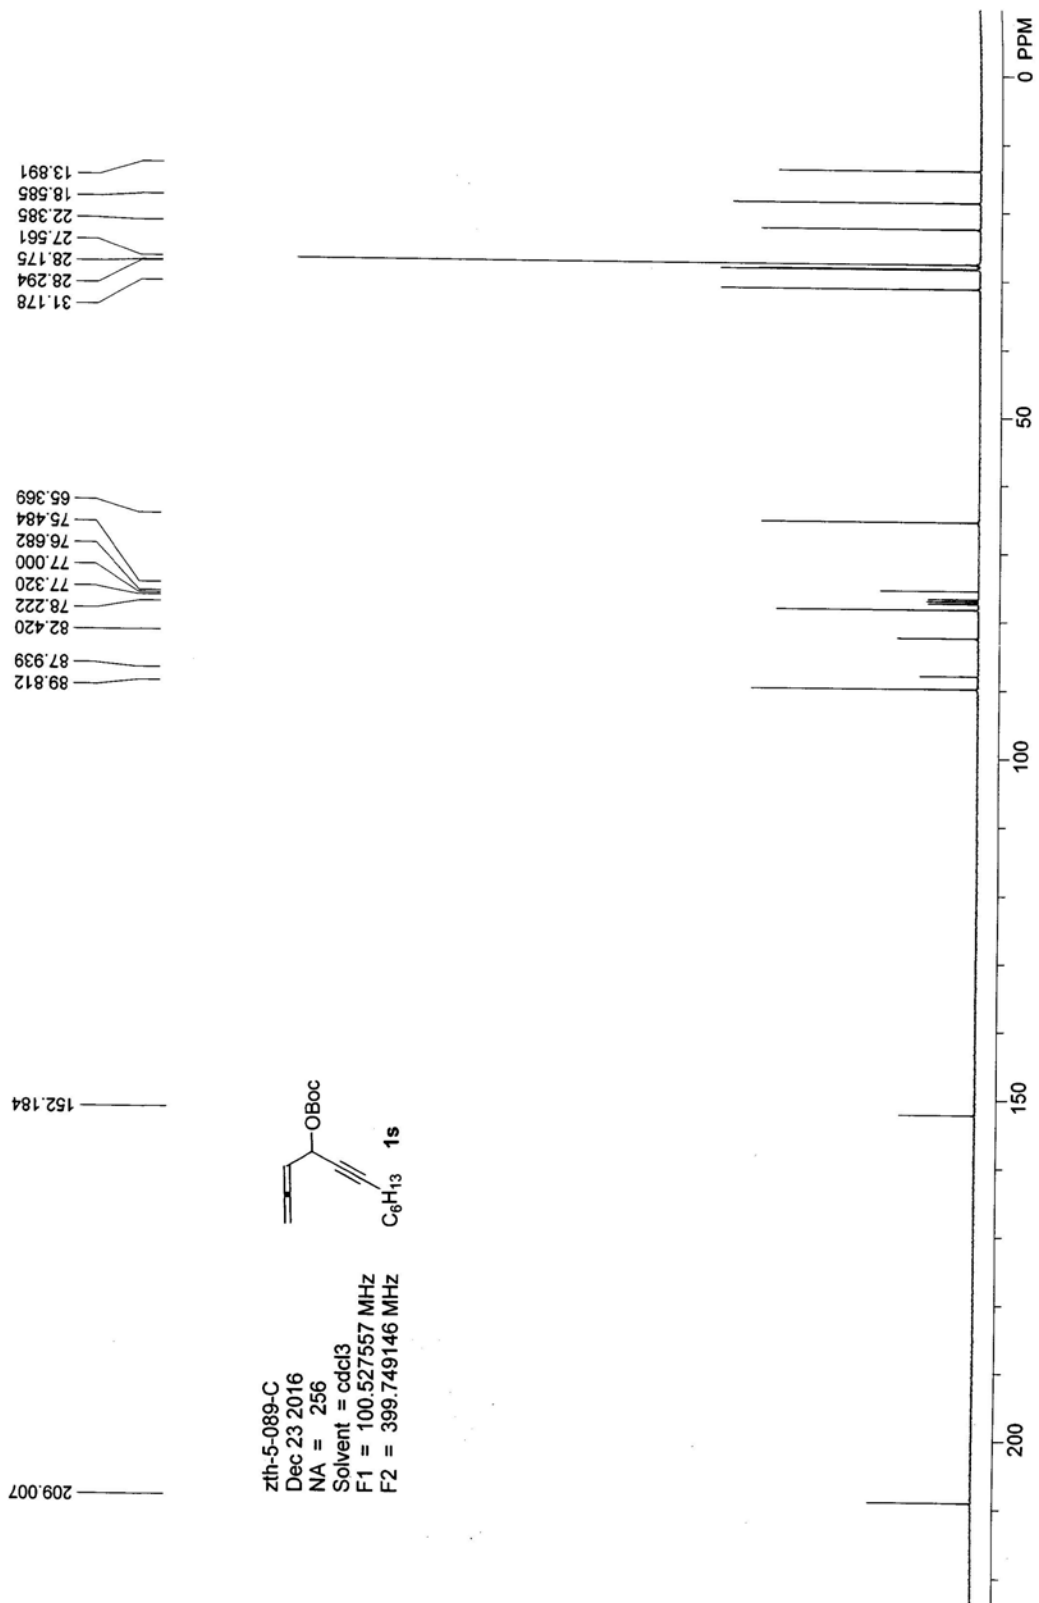

1-phenyl-3-(propa-1,2-dienyl)octan-1-one (3aa, zth-3-157)

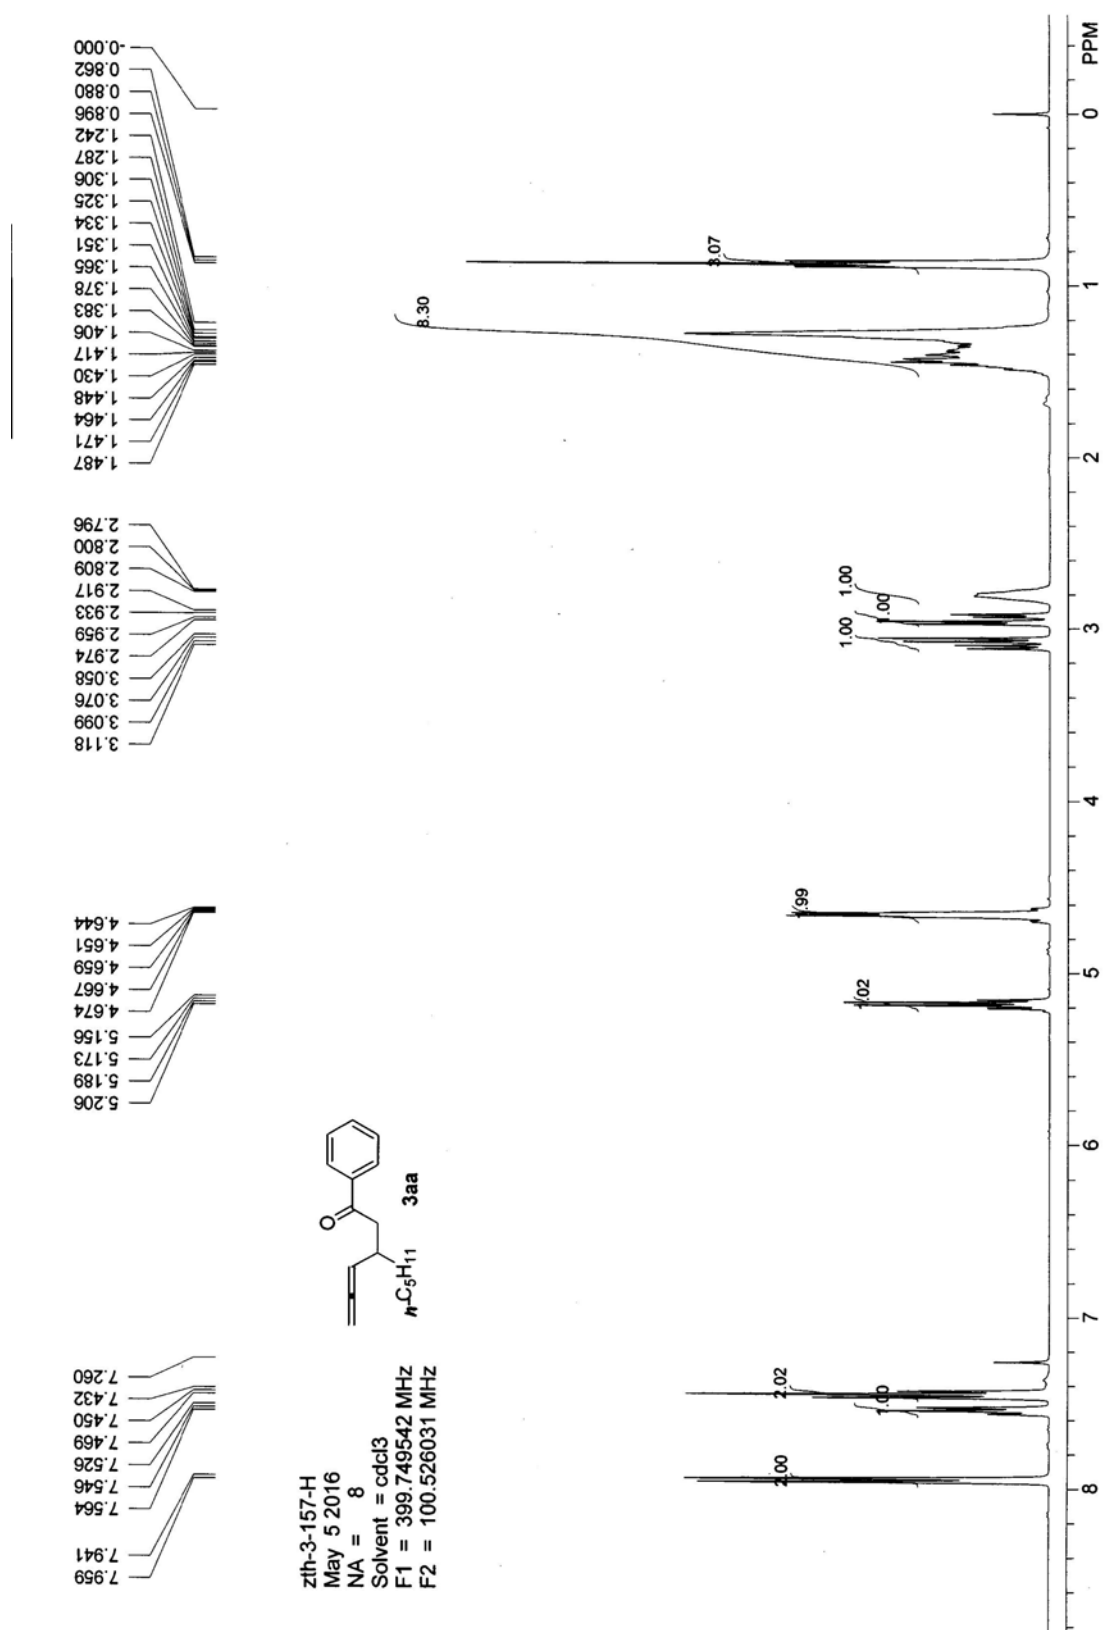

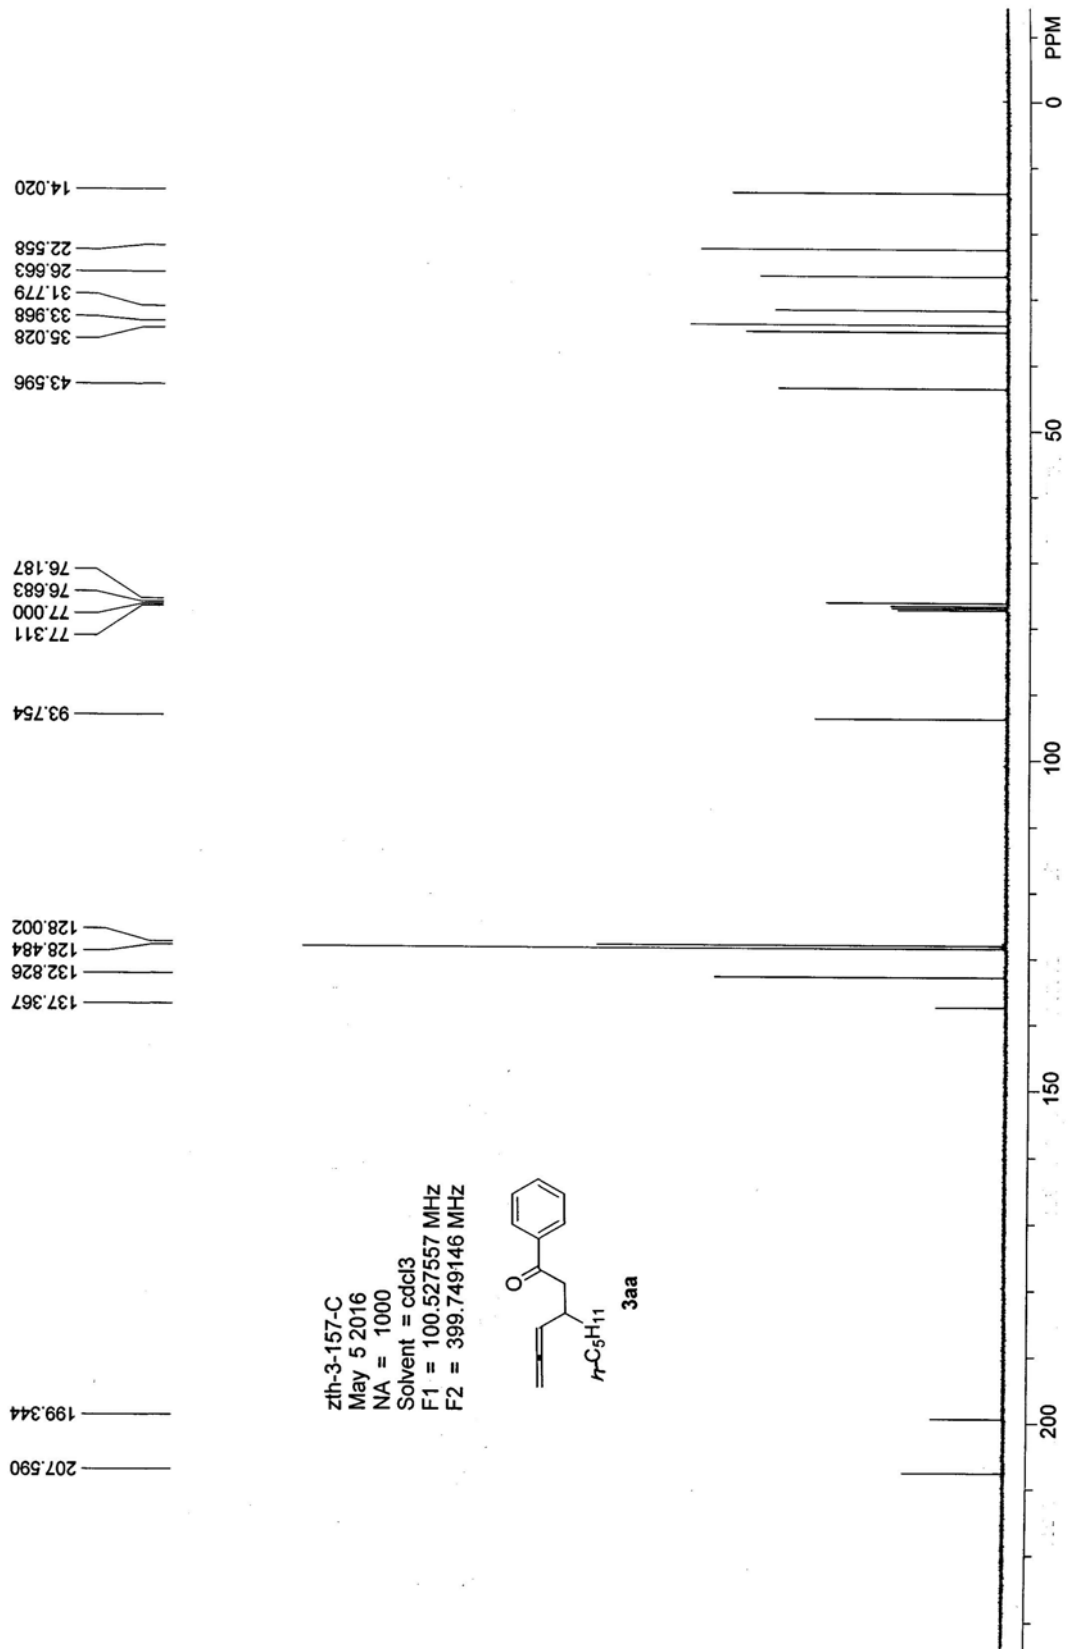

zlh-3-157-C  
 May 5 2016  
 NA = 1000  
 Solvent = cdcl3  
 F1 = 100.527557 MHz  
 F2 = 399.749146 MHz

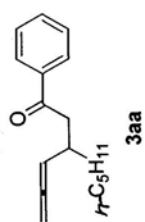

**1-phenyl-3-(propa-1,2-dienyl)nonan-1-one (3fa, zth-3-158)**

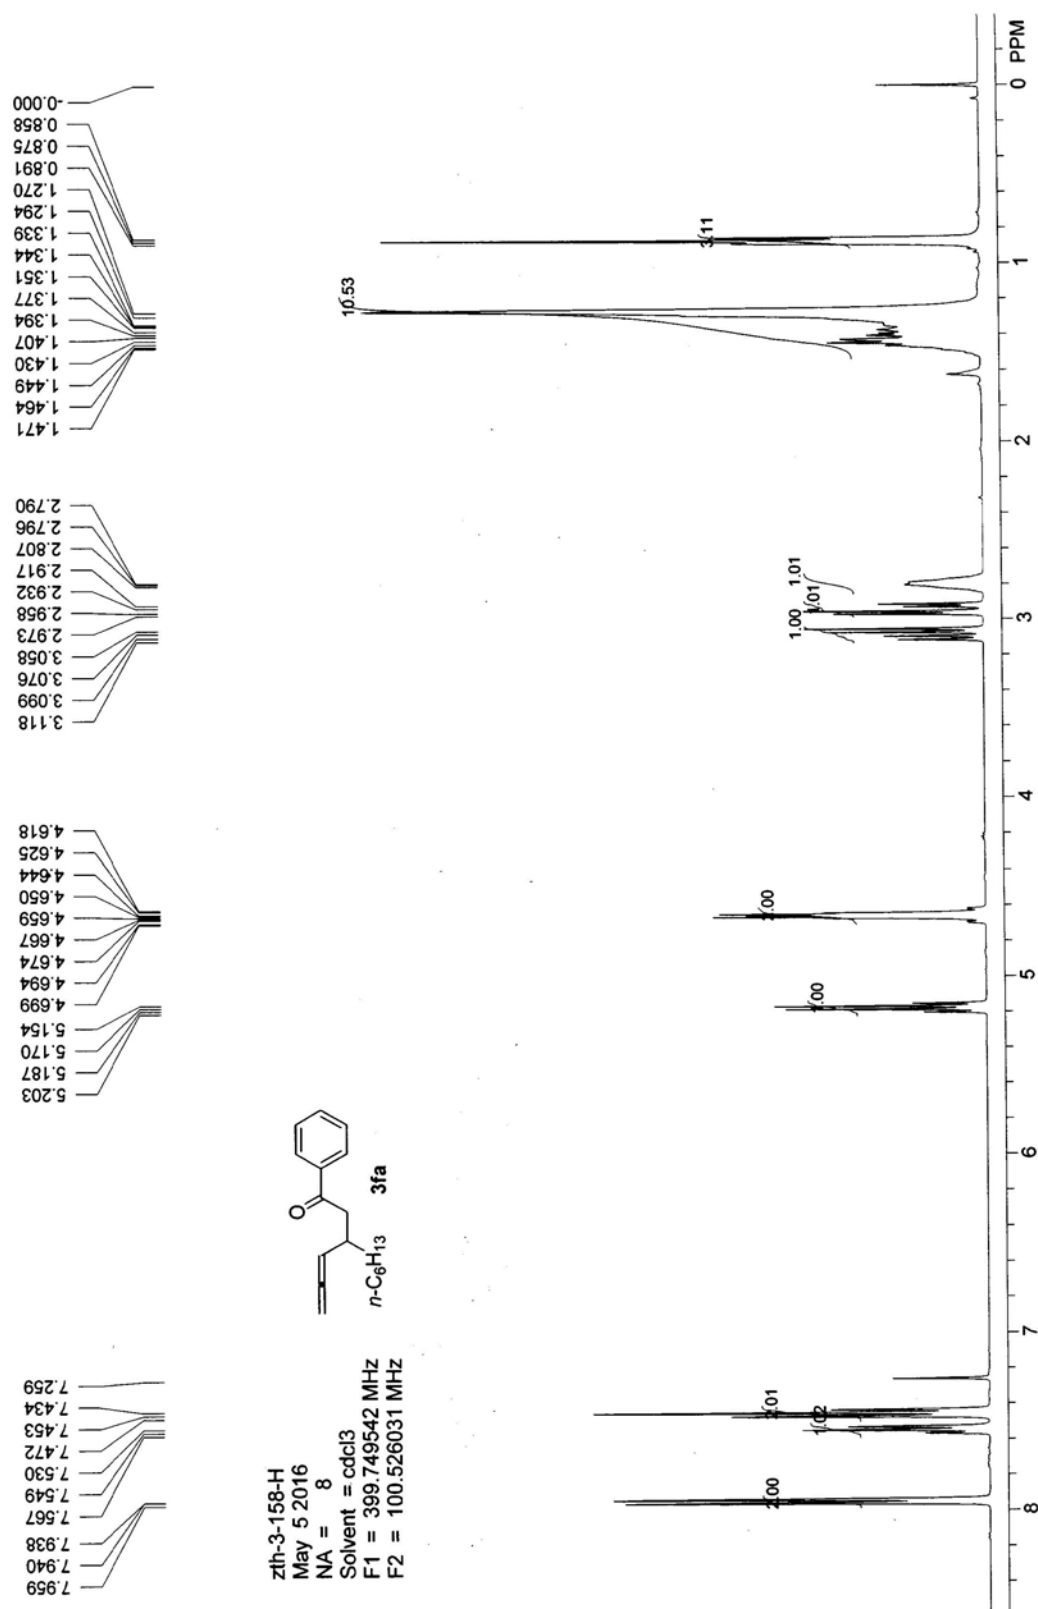

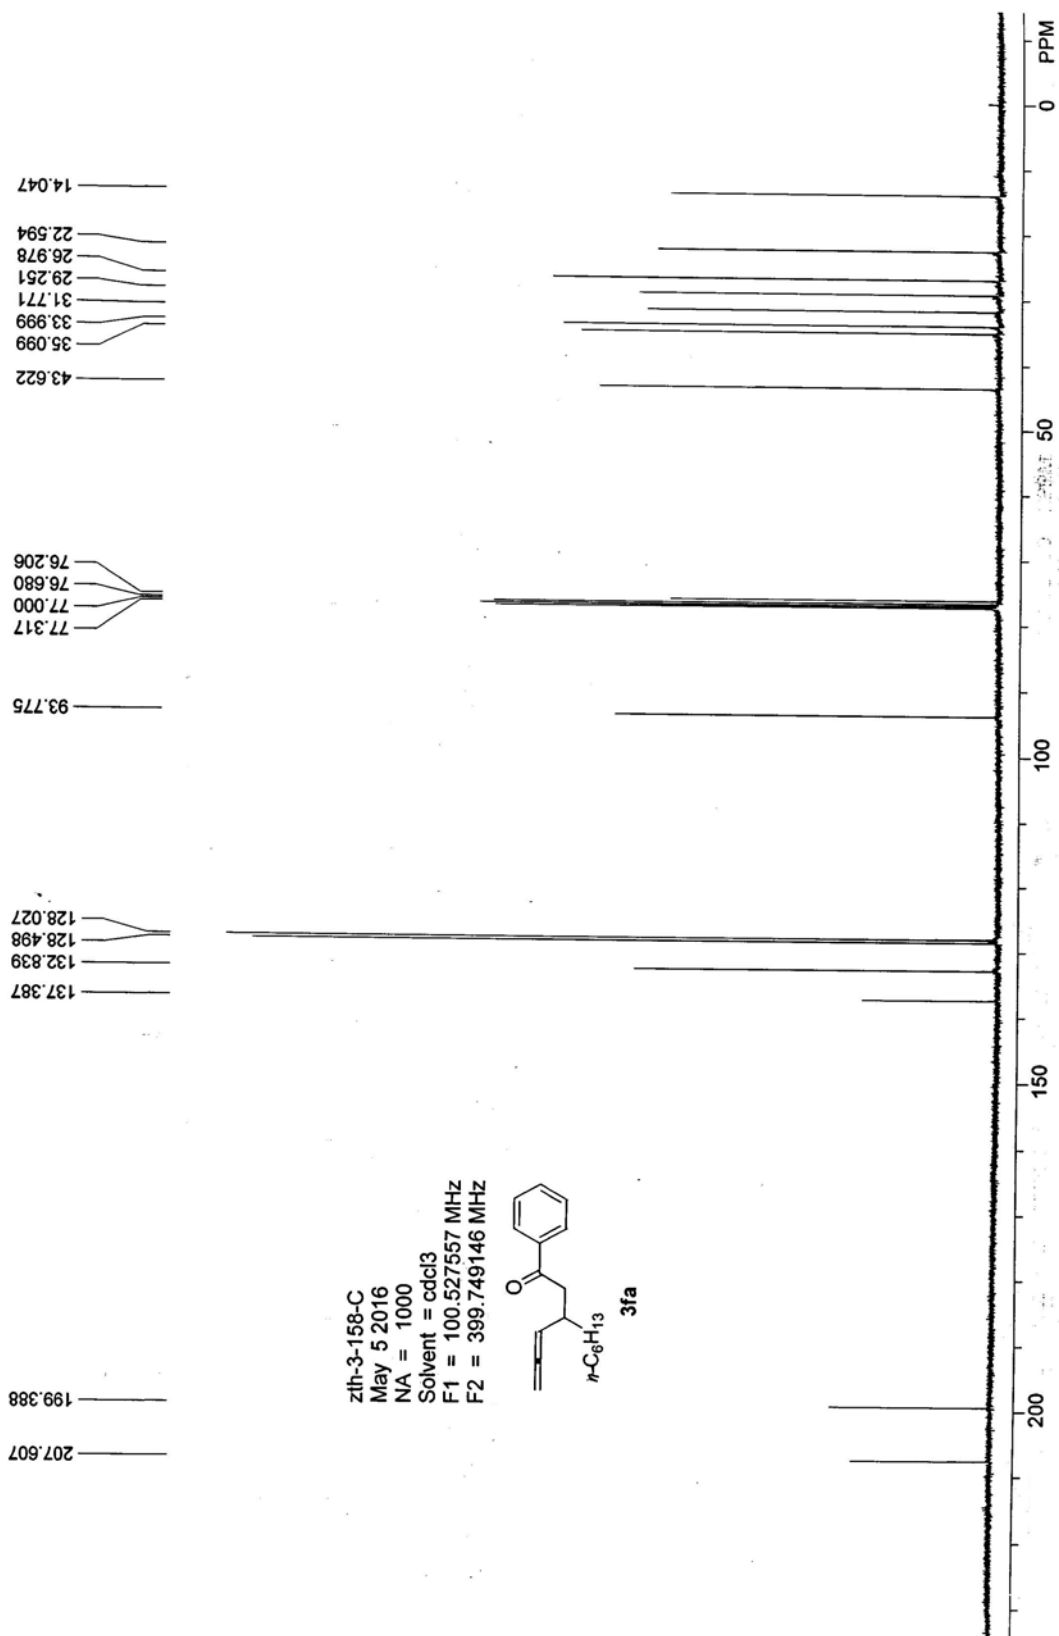

zlh-3-158-C  
 May 5 2016  
 NA = 1000  
 Solvent = cdcl3  
 F1 = 100.527557 MHz  
 F2 = 399.749146 MHz

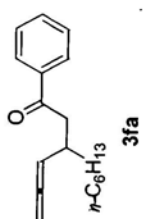

**1-phenyl-3-(propa-1,2-dienyl)nonan-1-one (3fa, zth-5-146)**

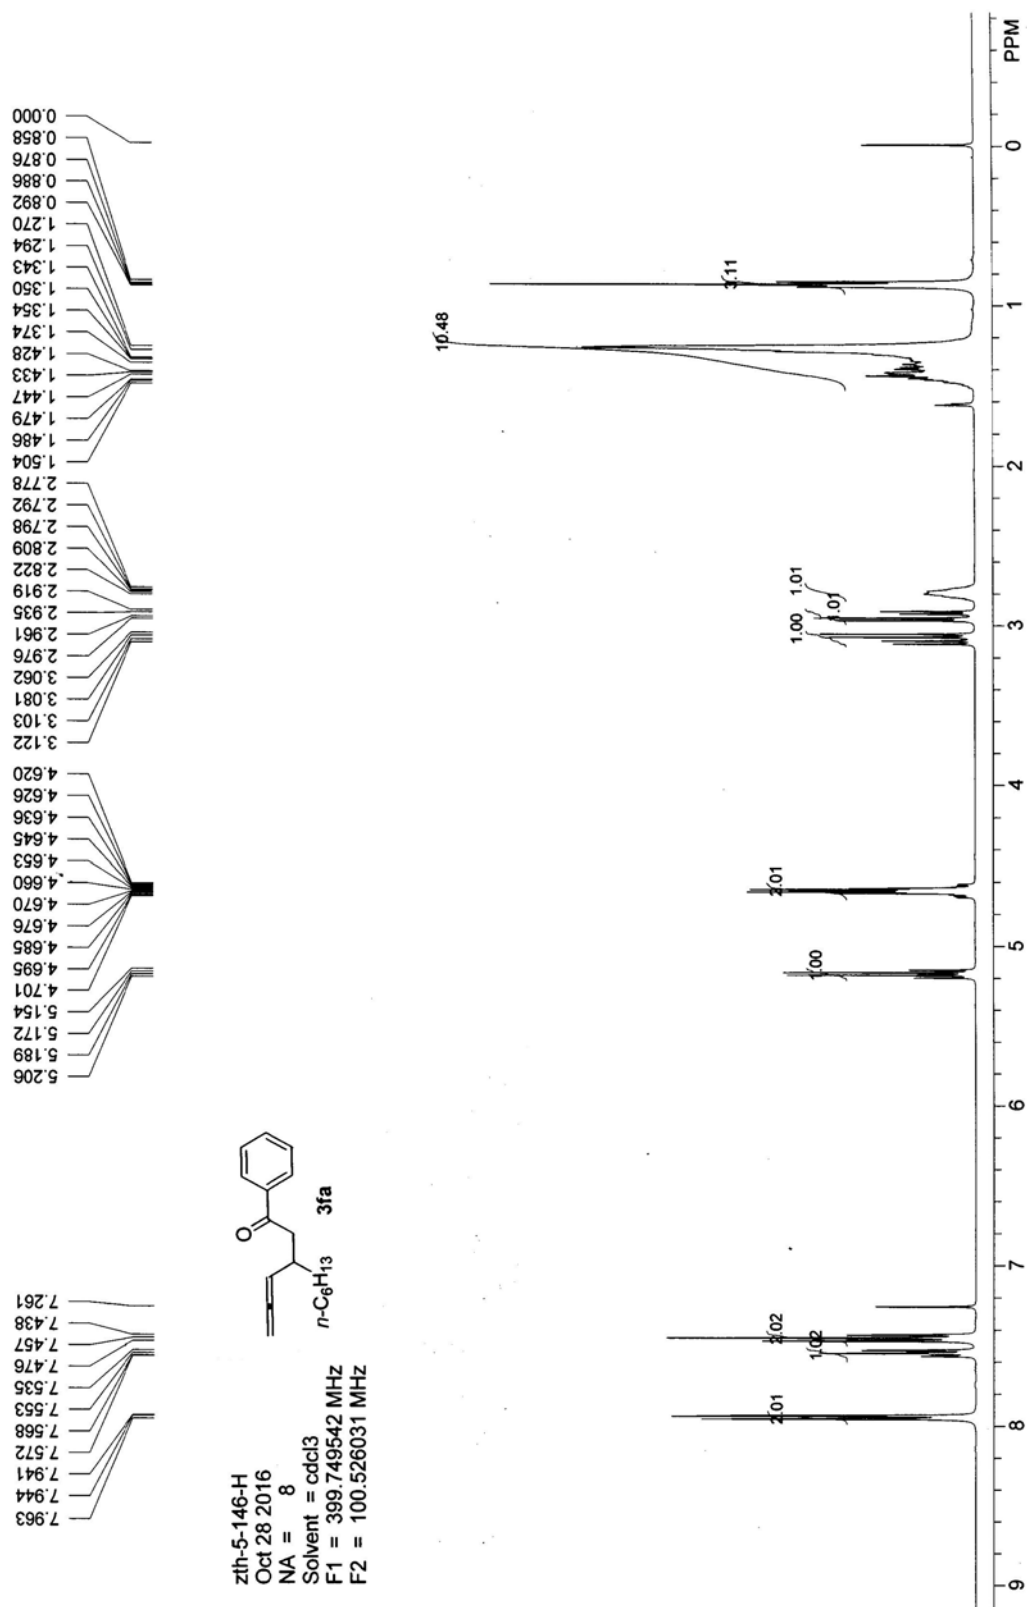



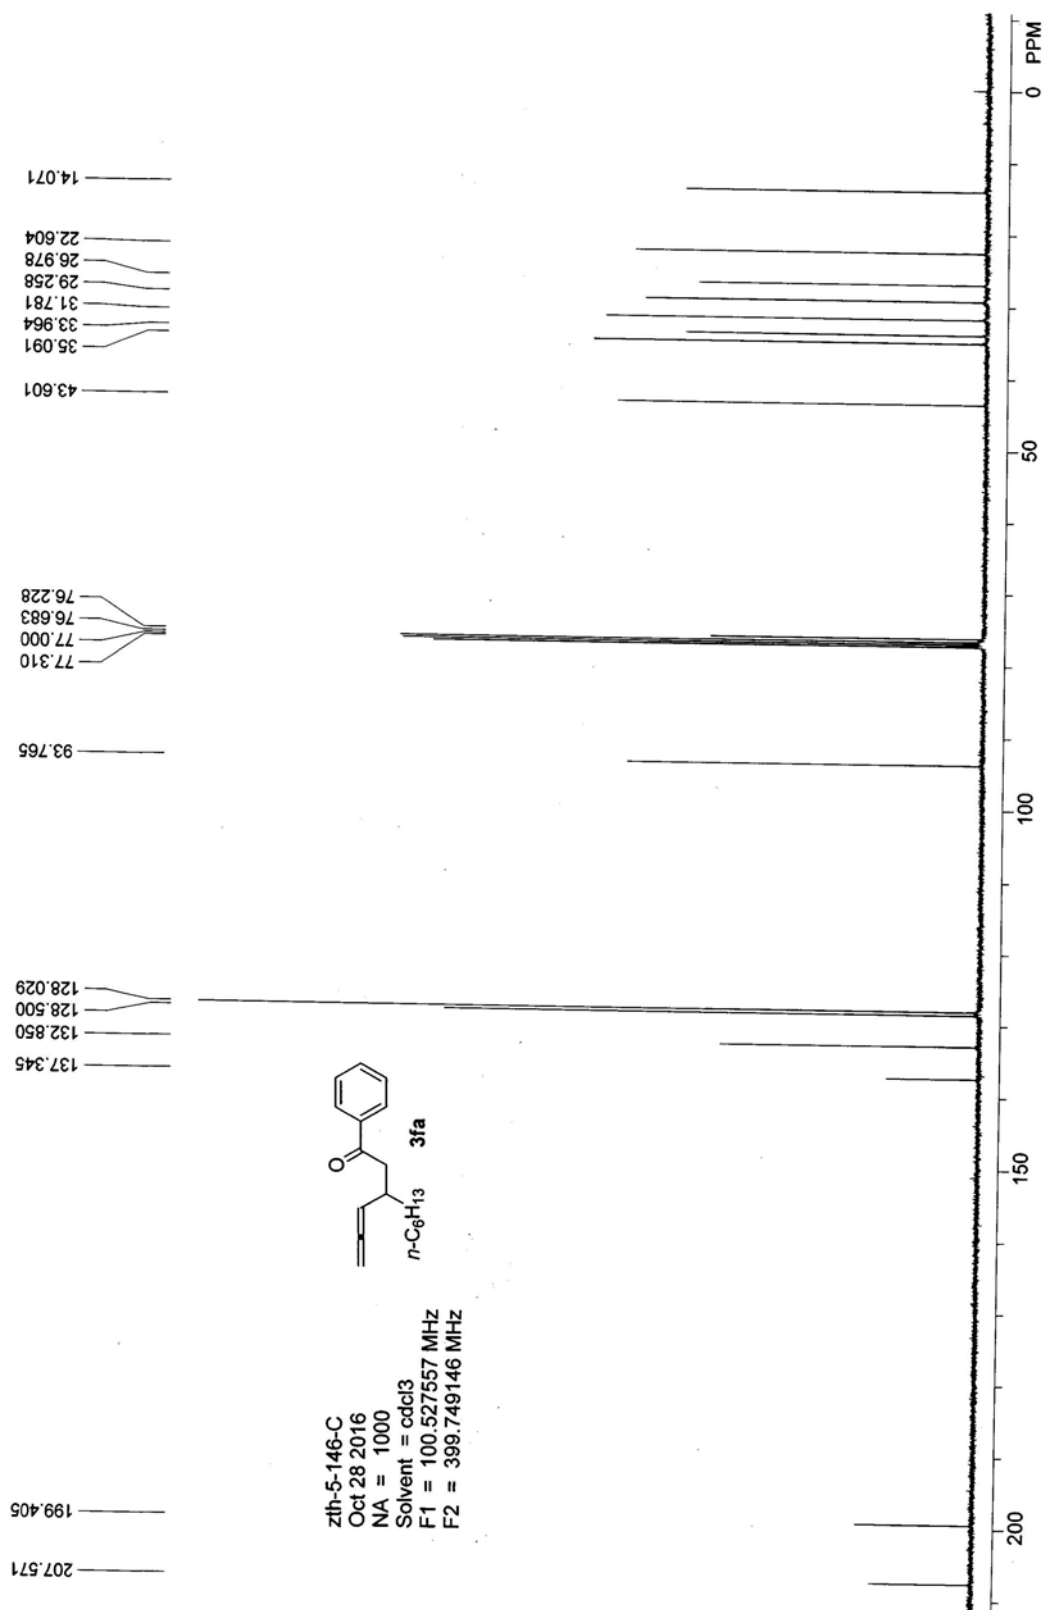

1-(4-bromophenyl)hexa-4,5-dien-1-one (3gb, zth-5-060)

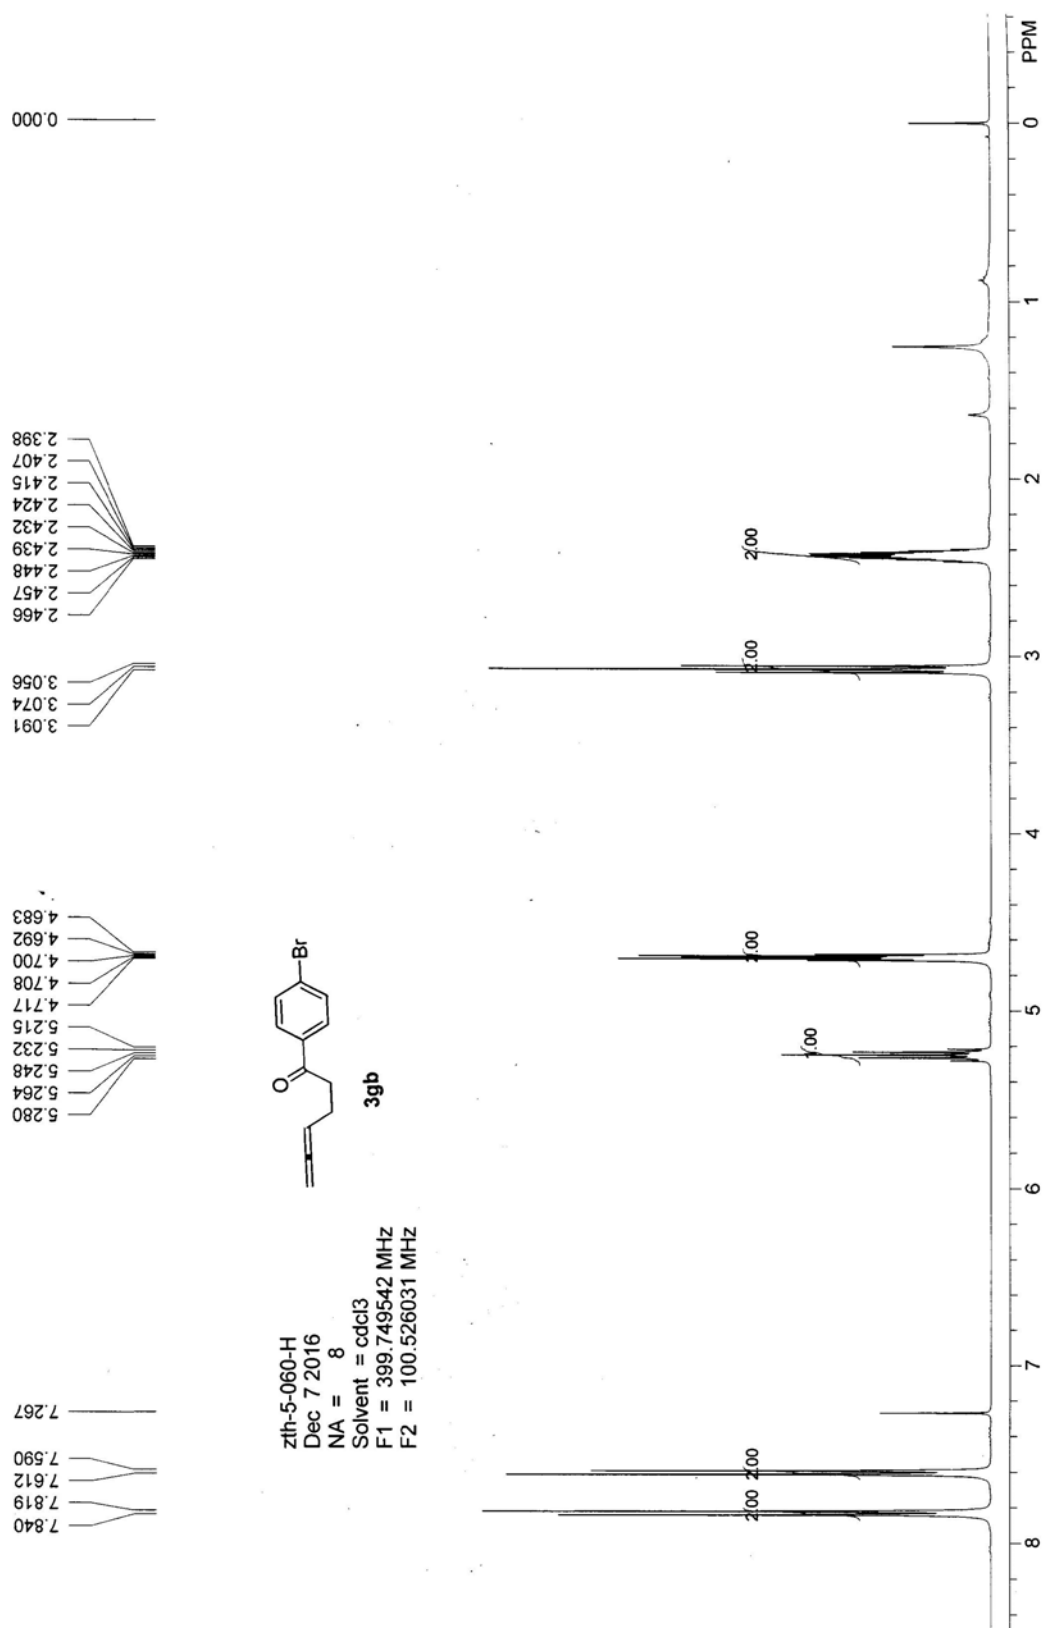

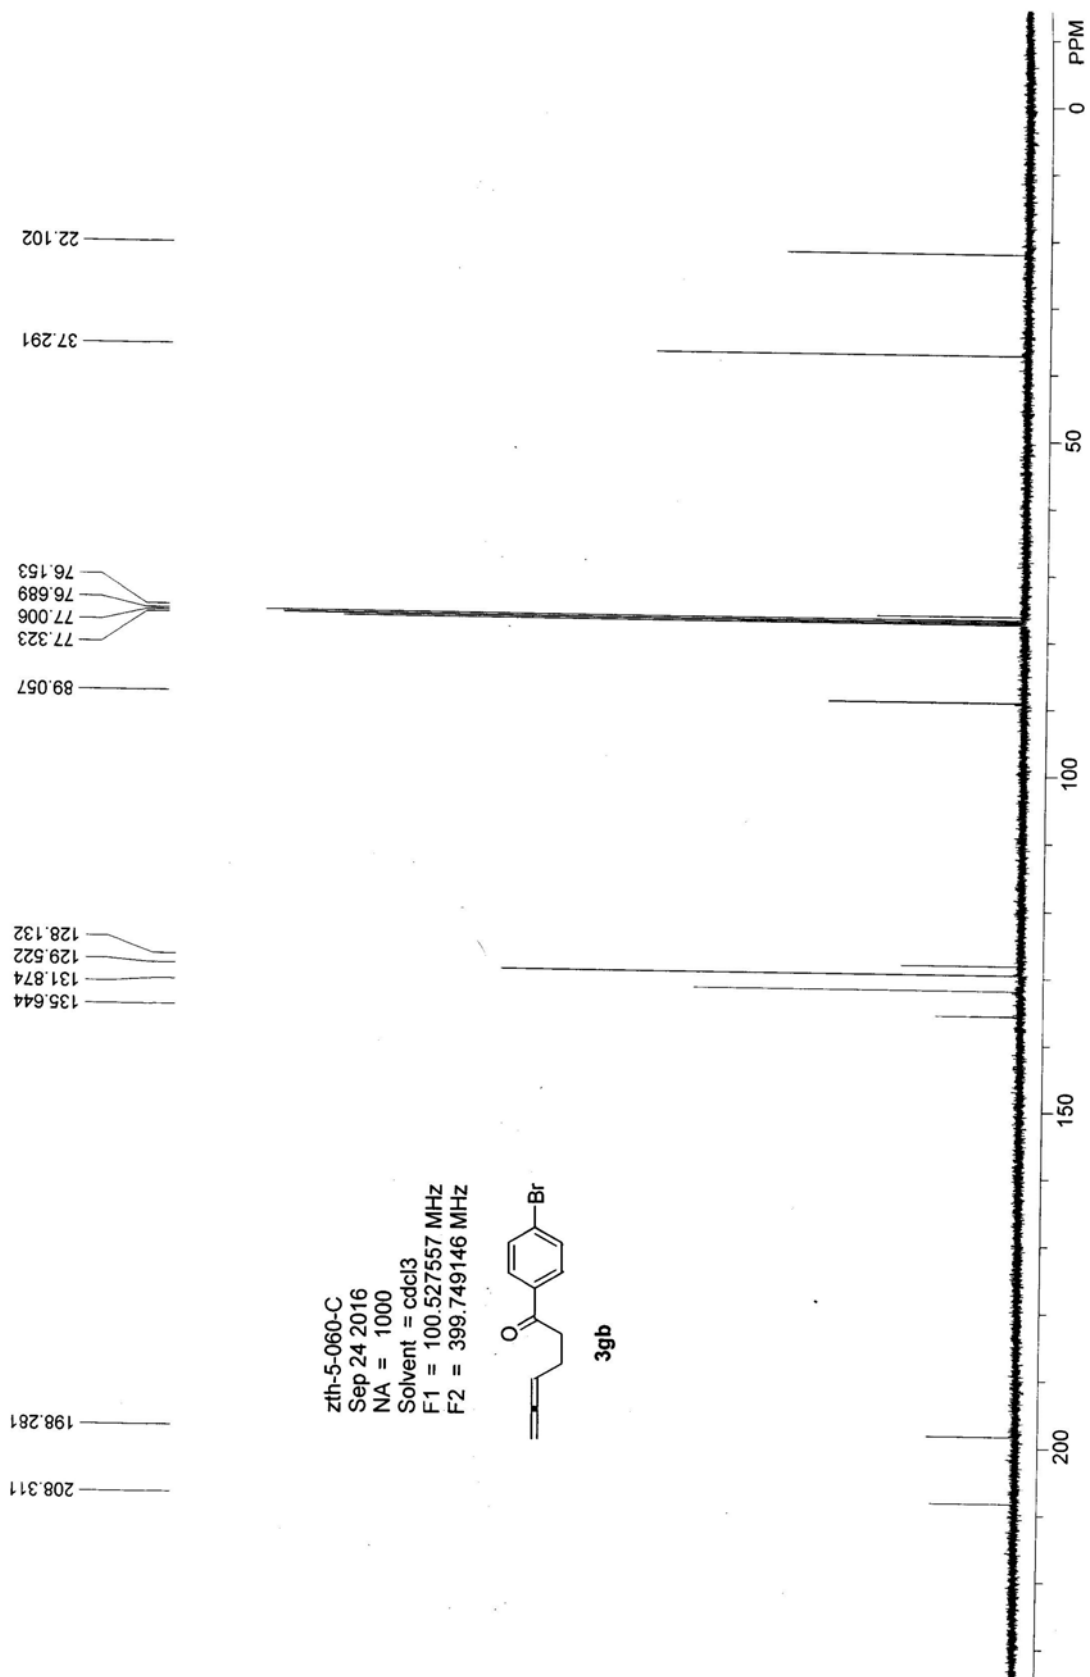

**1-(4-chlorophenyl)-3-phenethylhexa-4,5-dien-1-one (3hc, zth-5-050)**

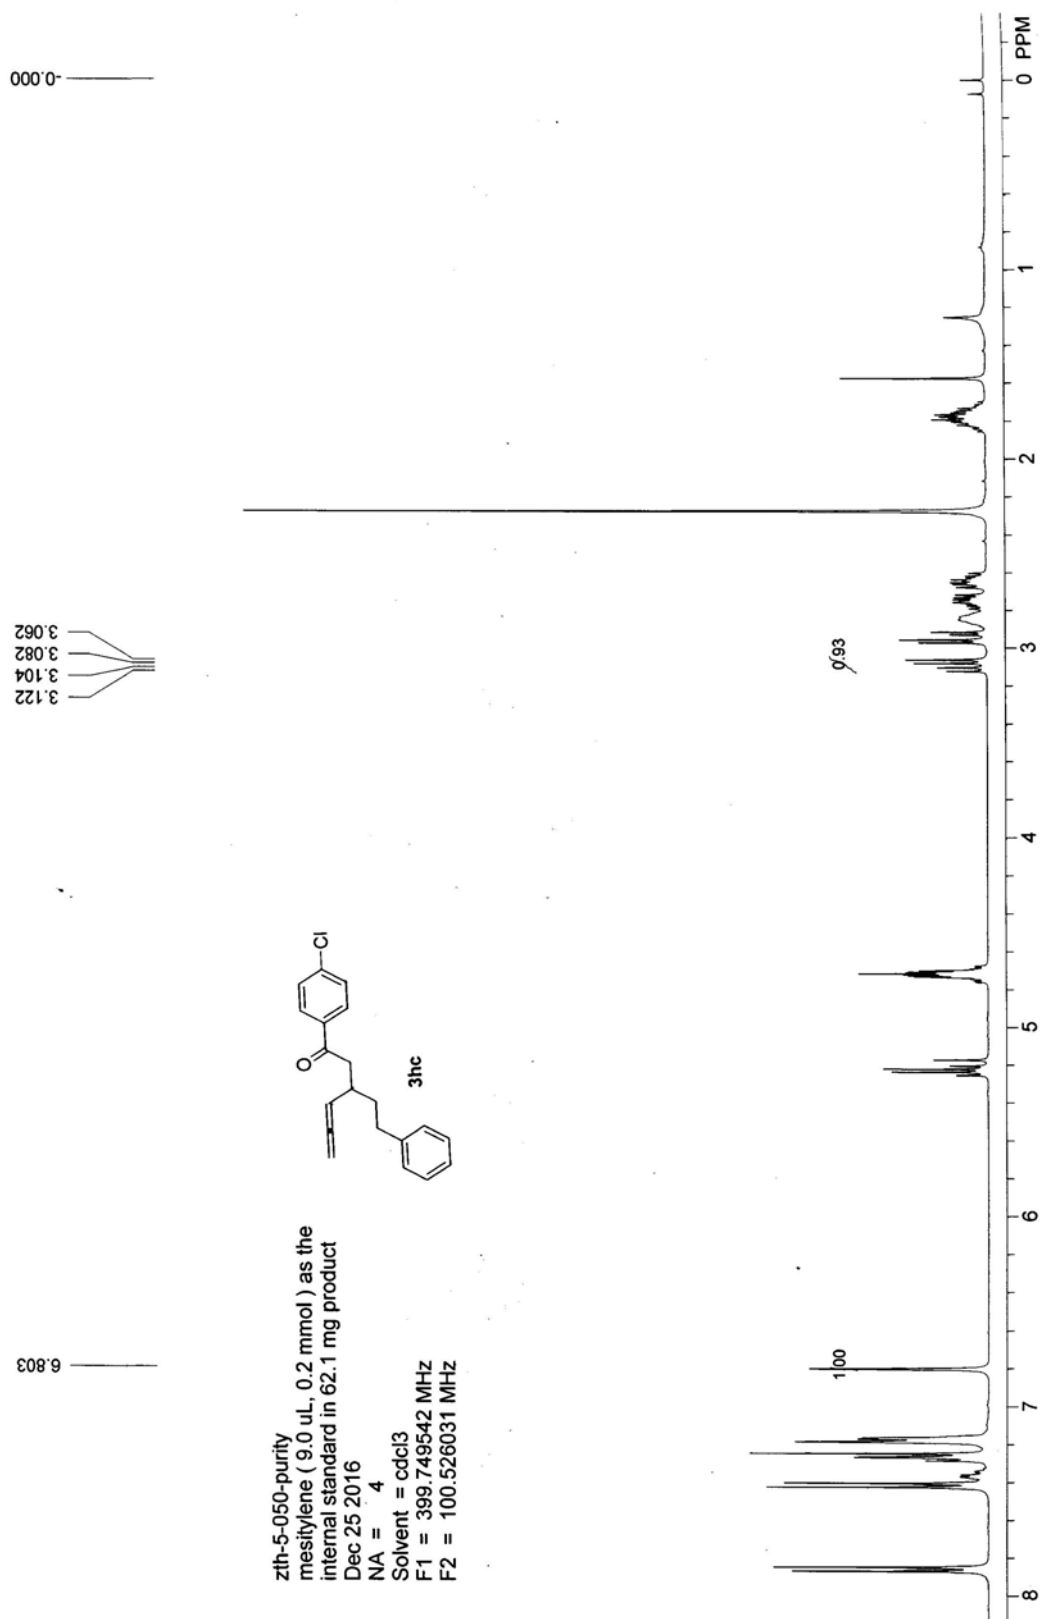

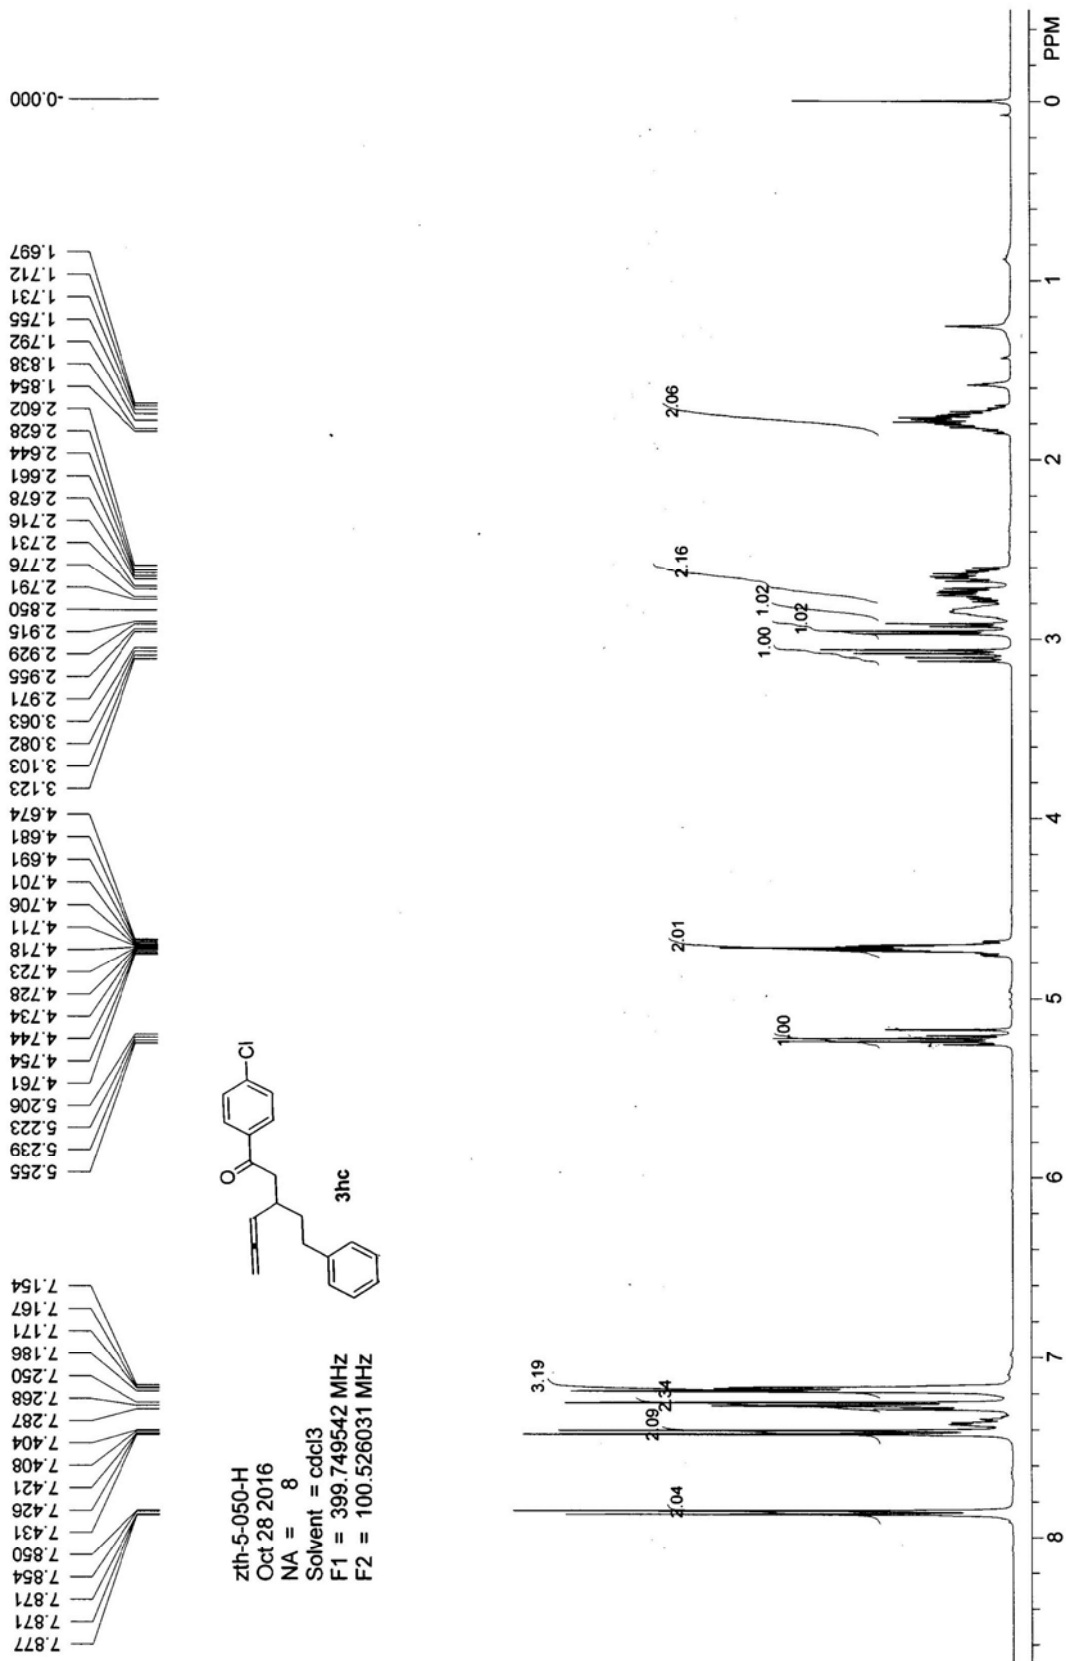

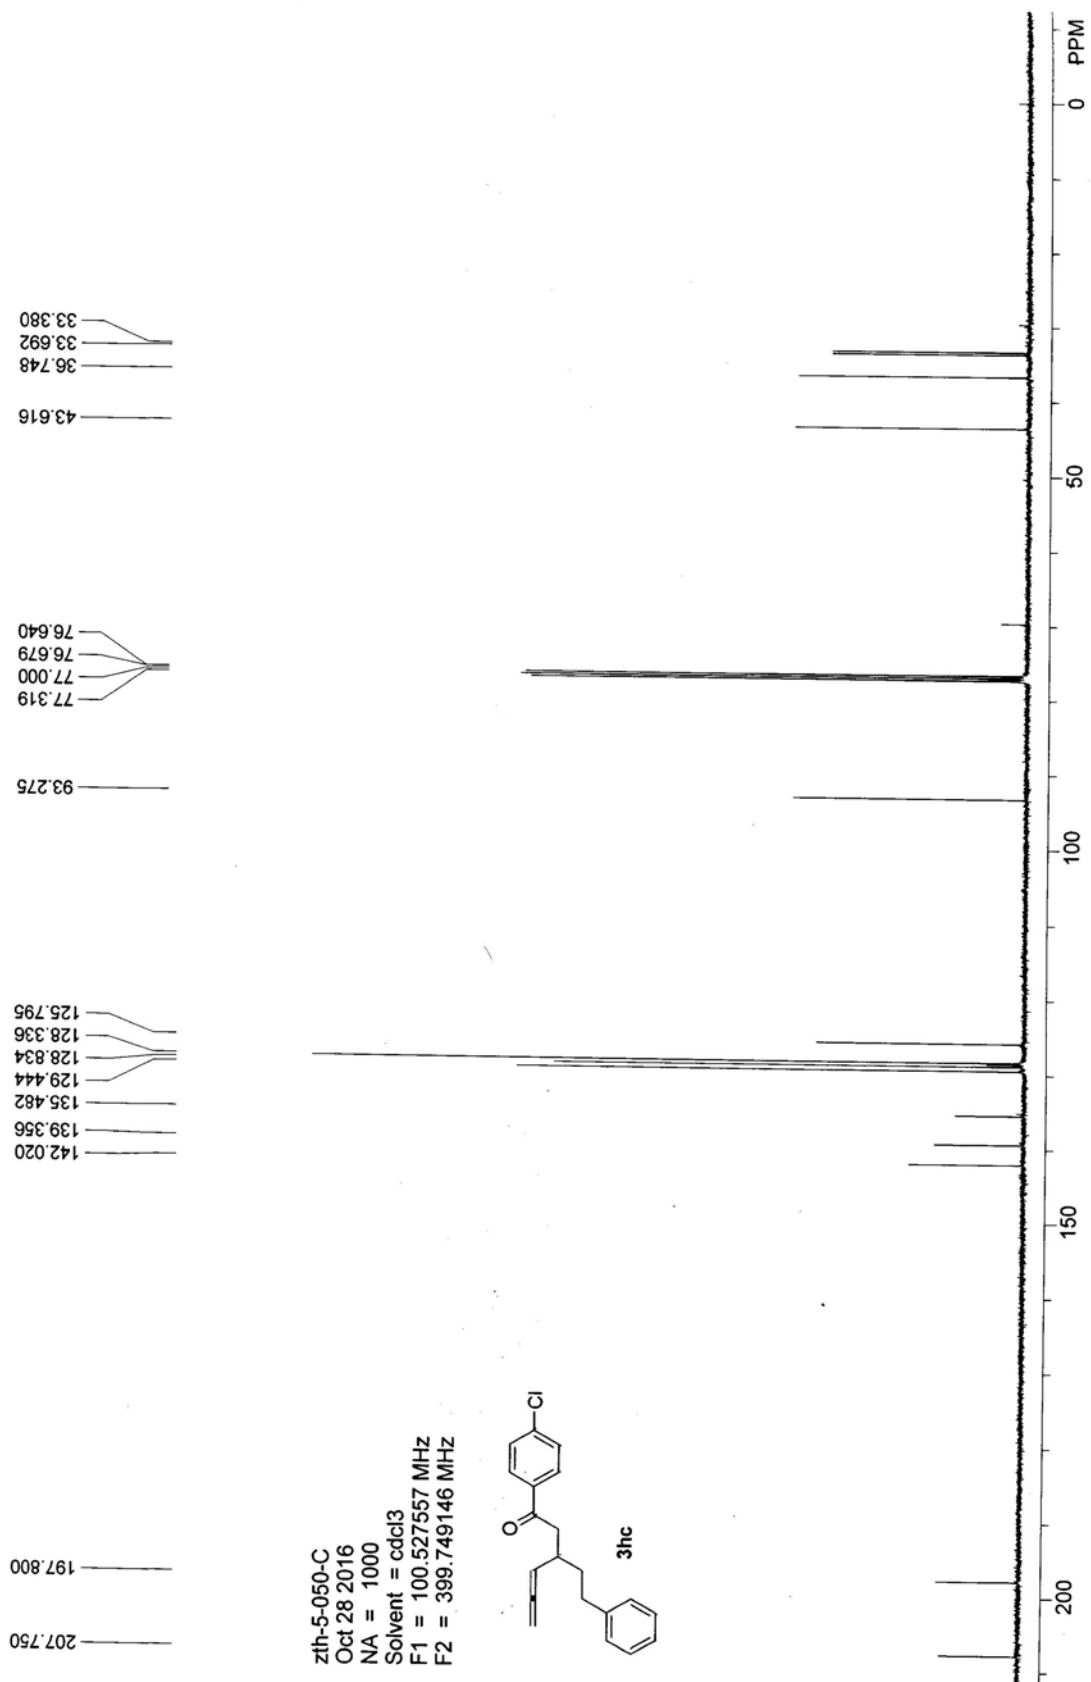

**1-(4-methoxyphenyl)-3-(propa-1,2-dienyl)tridec-12-en-1-one (3id, zth-5-022)**

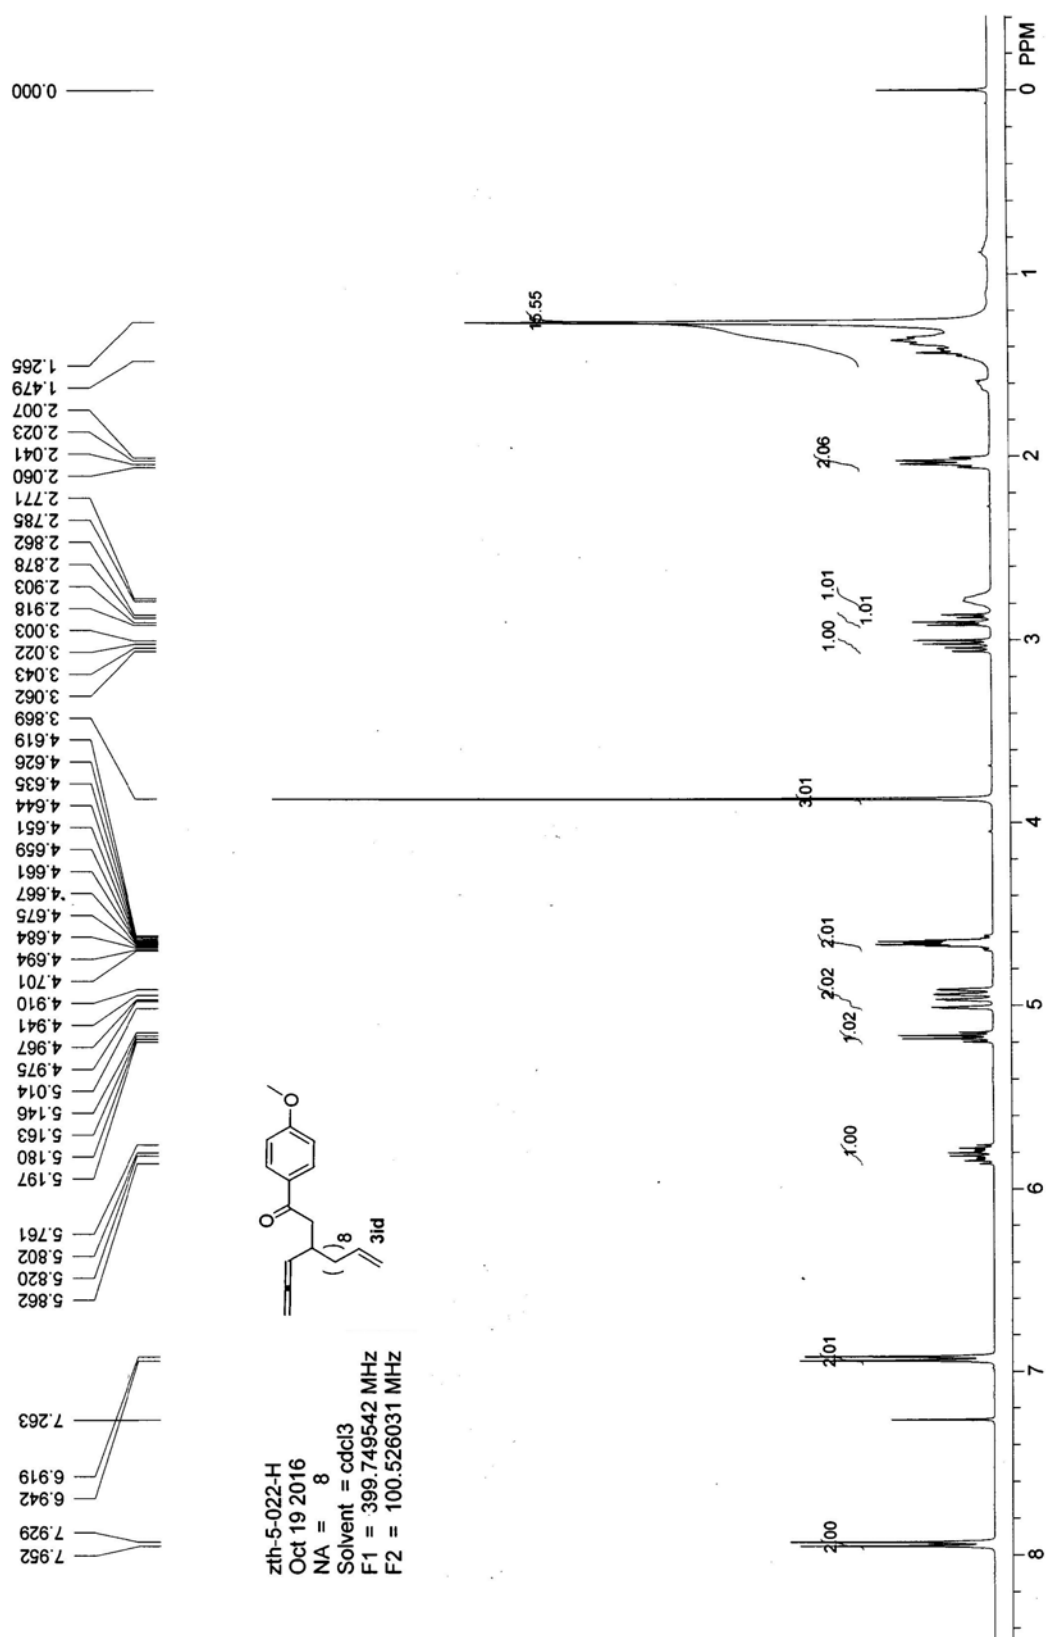

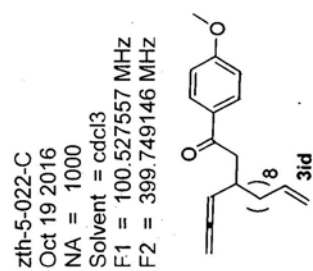



**1-*p*-tolyl-3-(propa-1,2-dienyl)-8-(tetrahydro-2*H*-pyran-2-yloxy)- octan-1-one (3je,  
zth-5-104)**

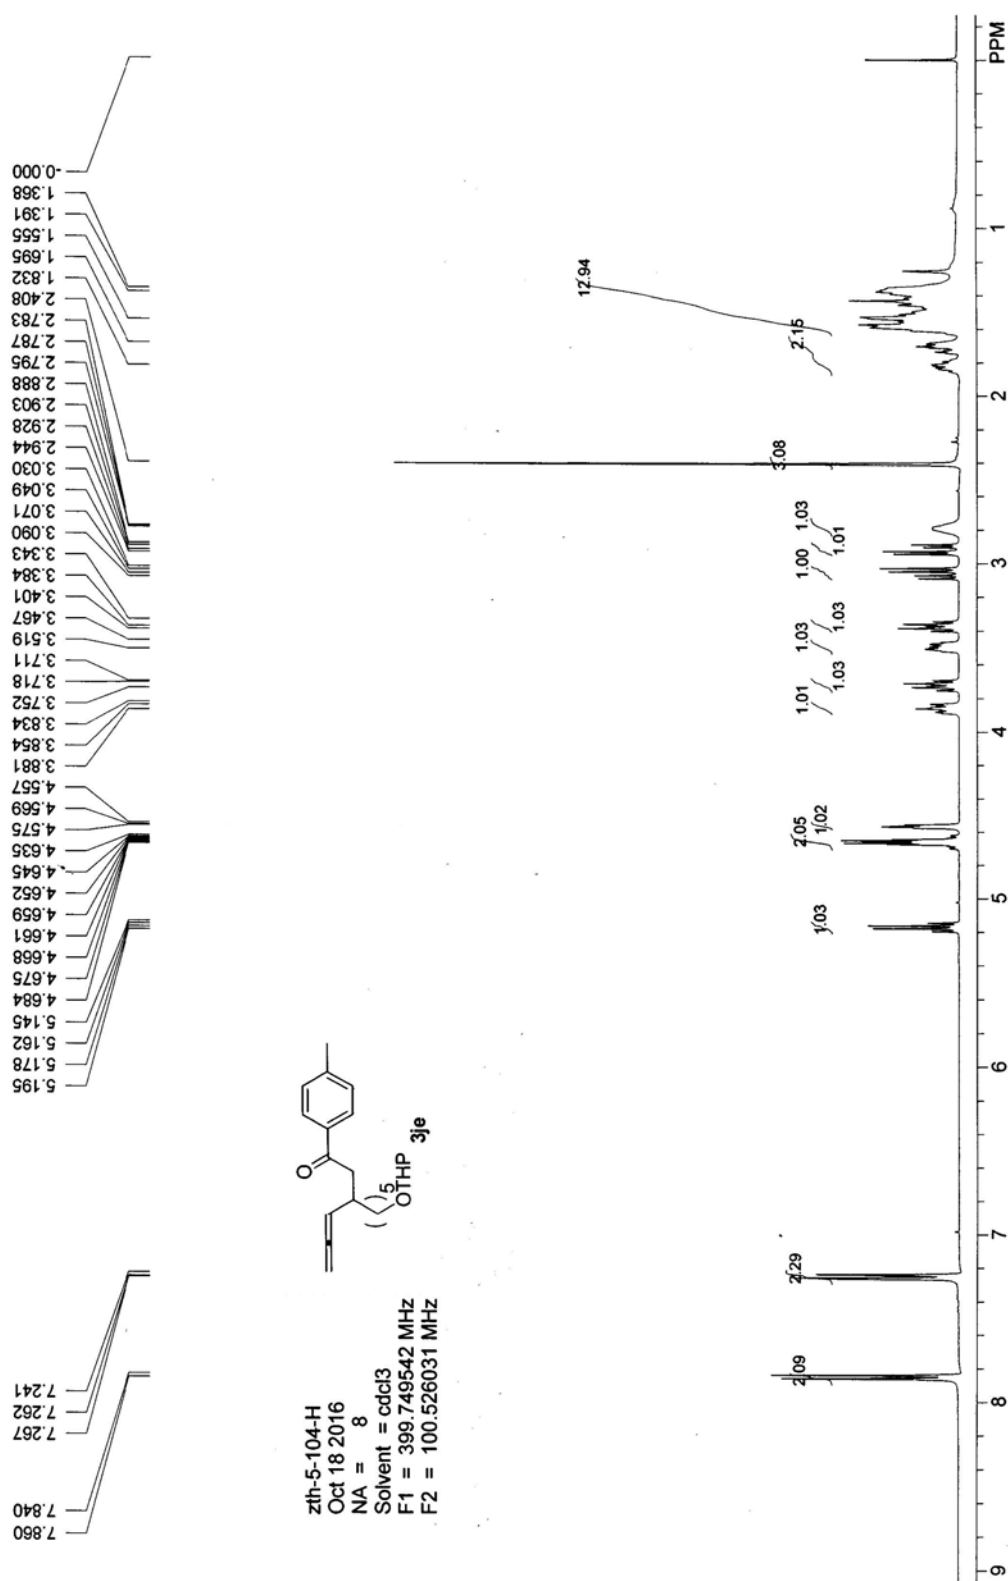

43.473  
34.983  
34.001  
30.727  
29.648  
26.884  
26.242  
25.456  
21.598  
19.652

77.321  
77.000  
76.680  
76.226  
67.535  
62.311

98.797  
93.738

143.603  
134.829  
129.178  
128.155

207.573  
198.973

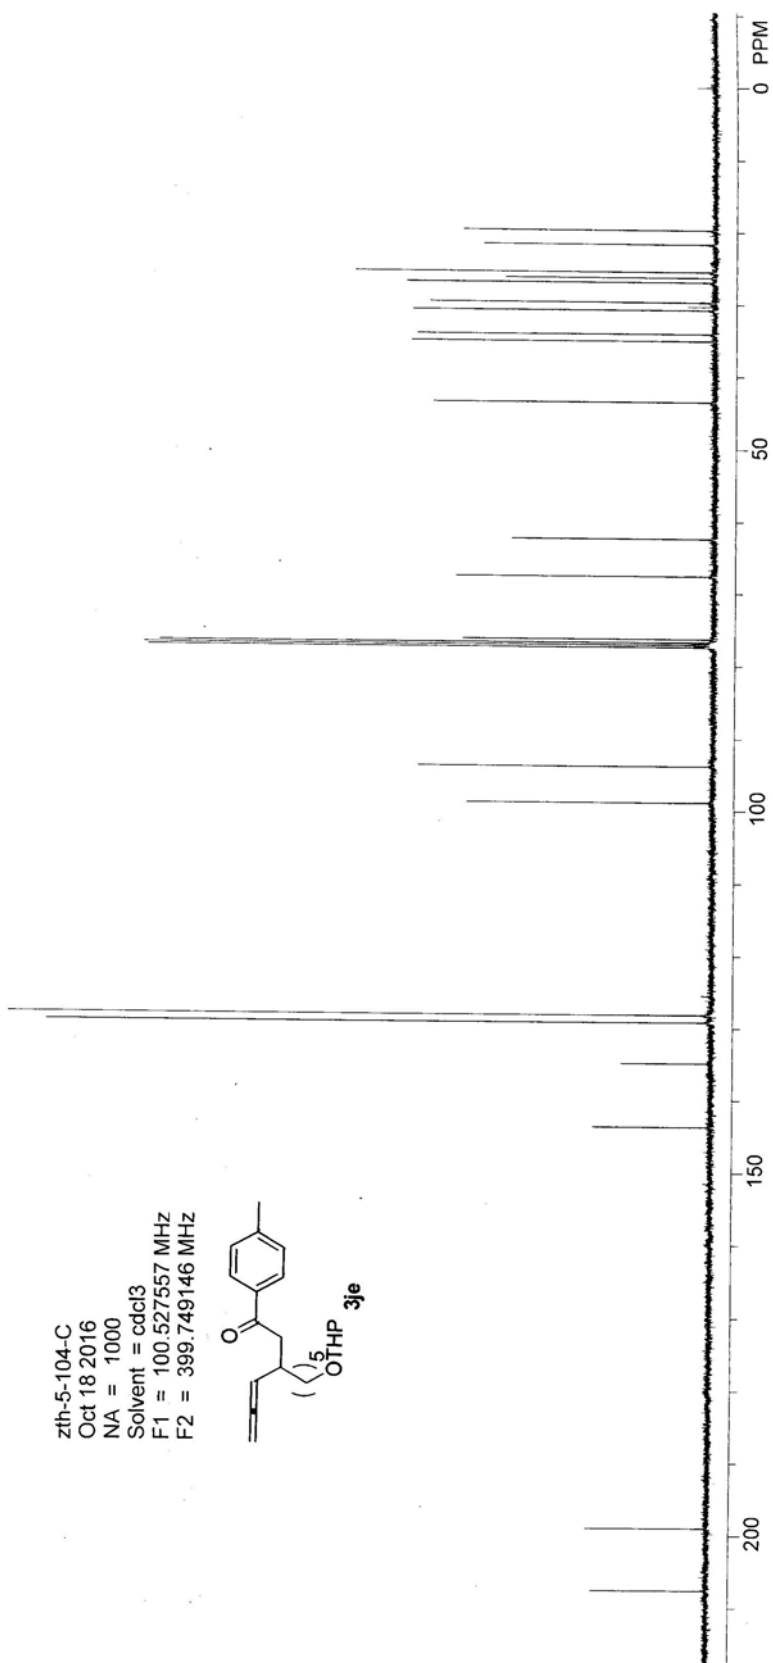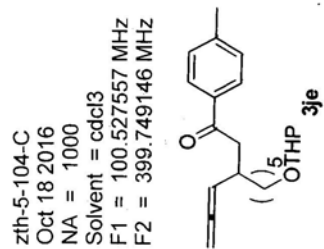

**3-(4-bromophenyl)-1-phenylhexa-4,5-dien-1-one (3pa, zth-4-129)**

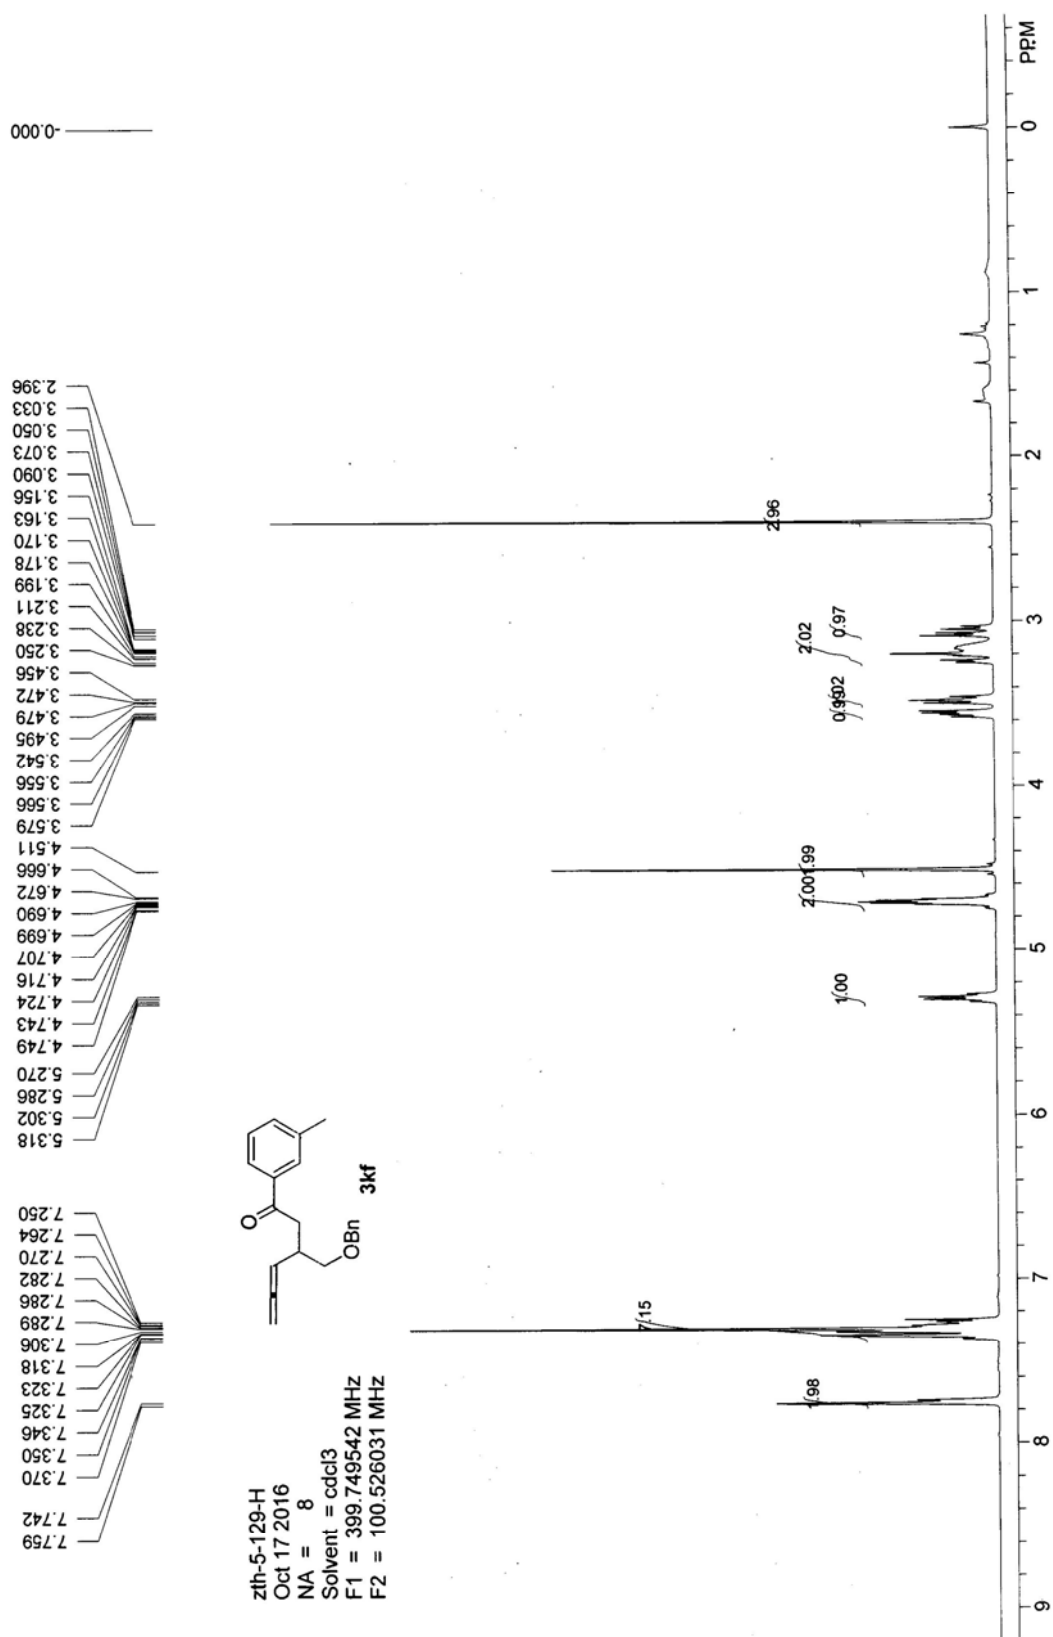

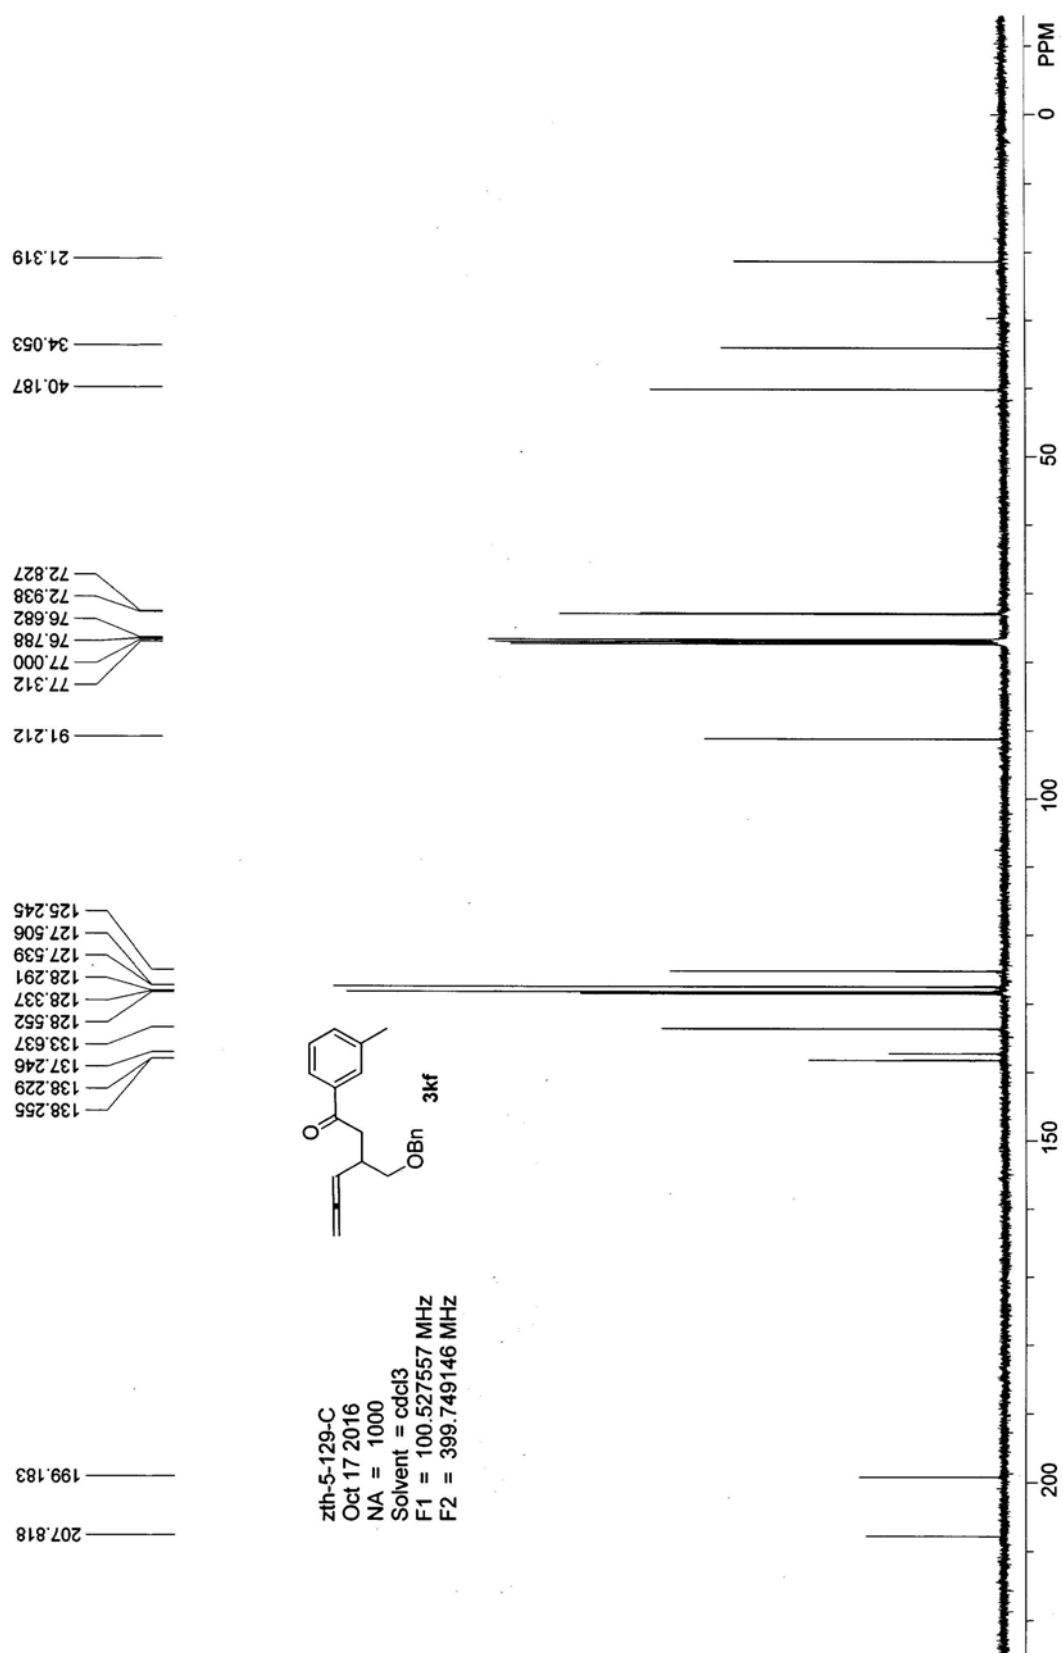

1-phenyl-3-(propa-1,2-dienyl)-8-(trimethylsilyl)oct-7-yn-1-one (3la, zth-5-131)

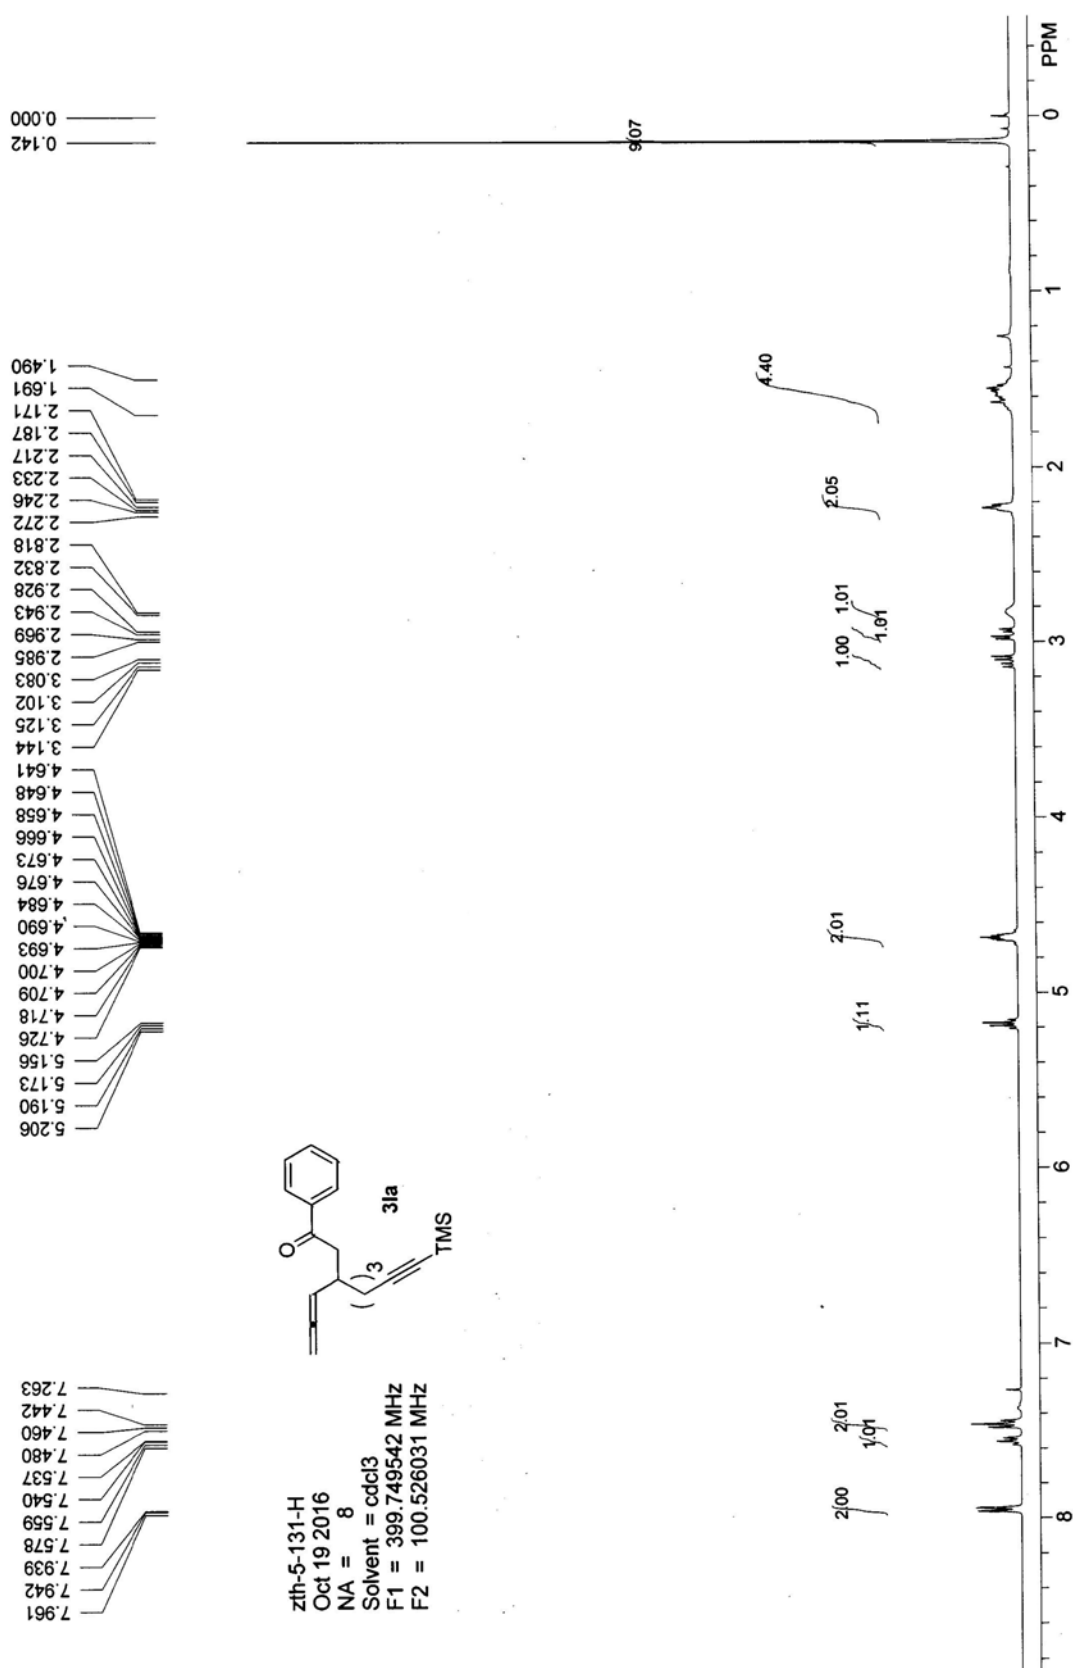

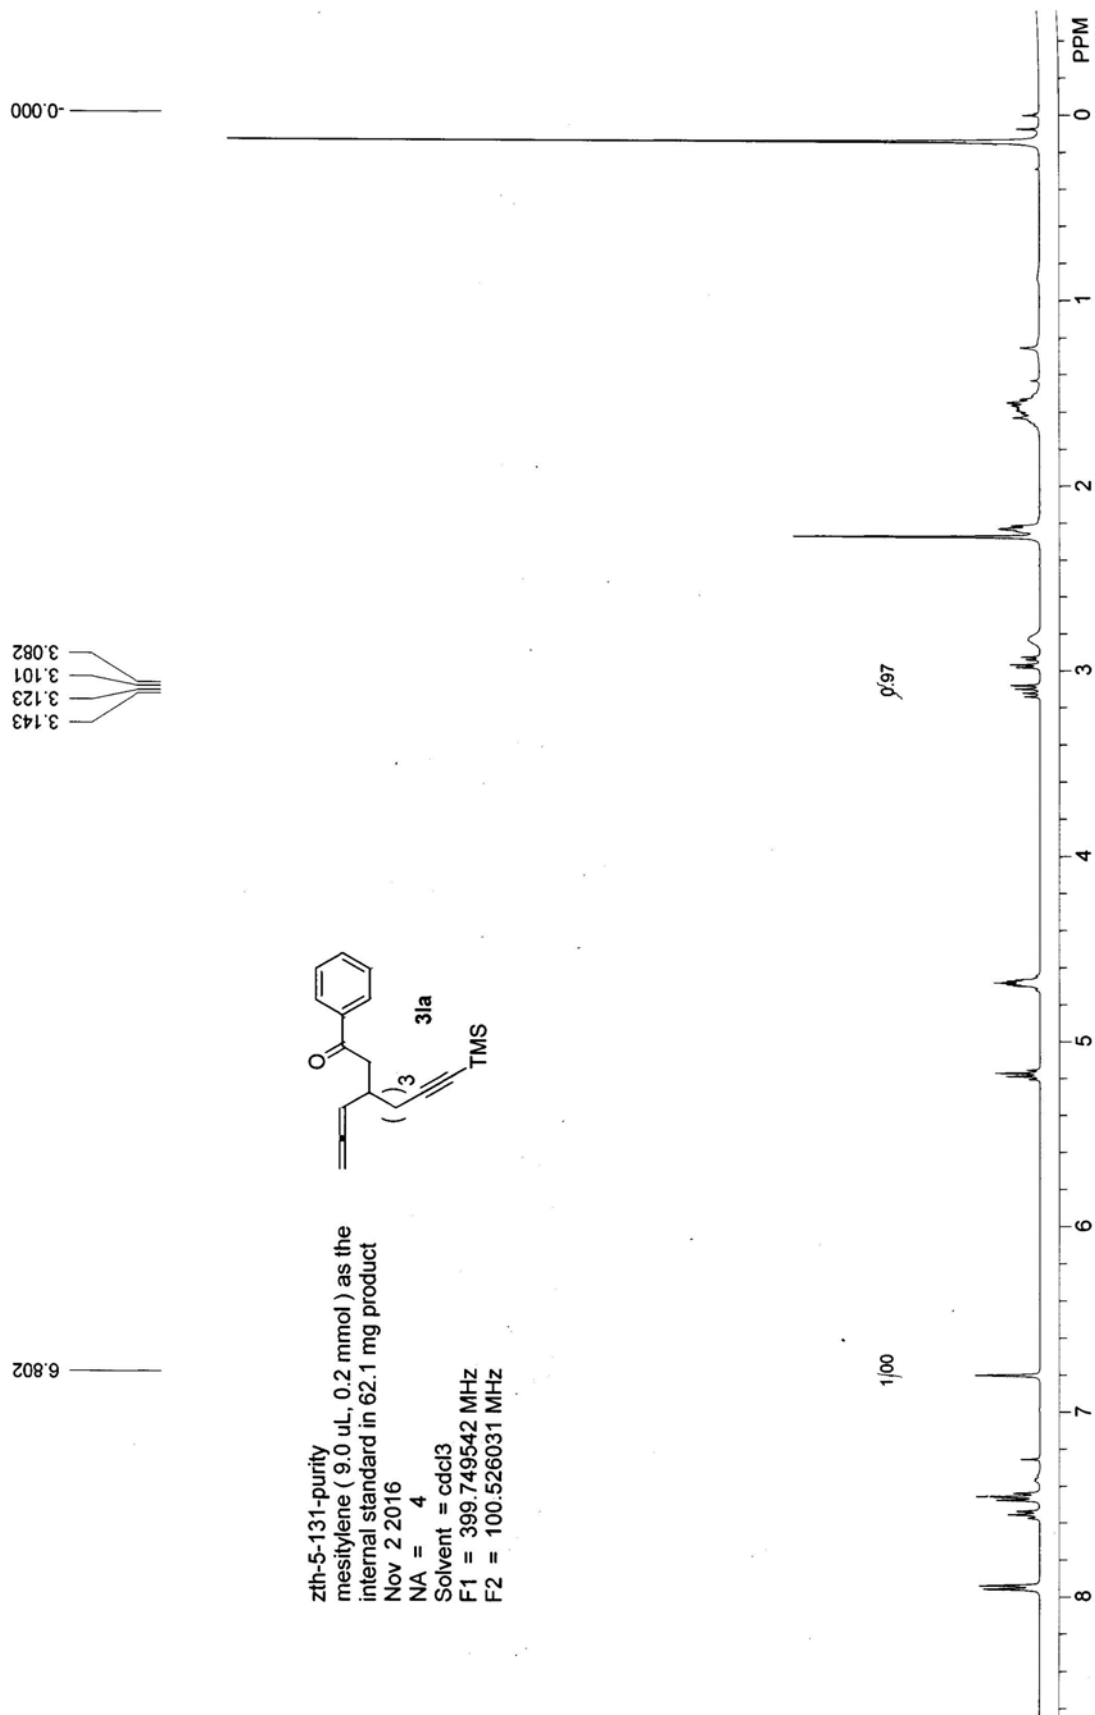

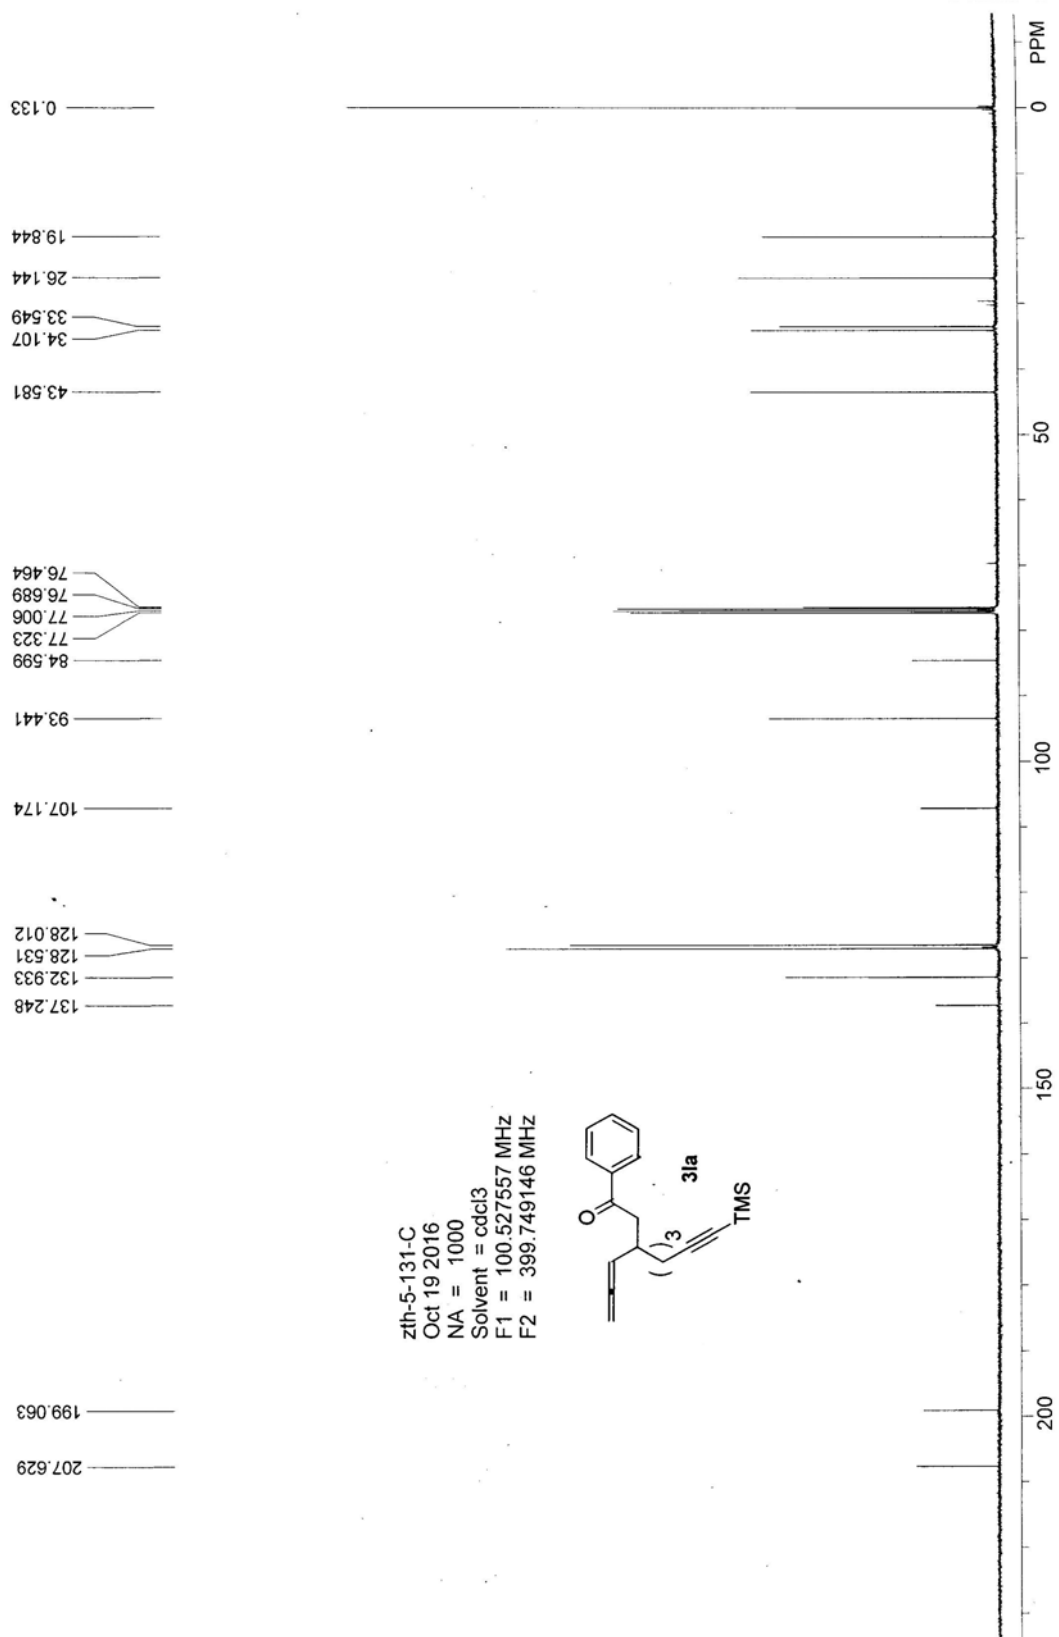

**3-phenyl-1-(thiophen-2-yl)hexa-4,5-dien-1-one (3mg, zth-5-069)**

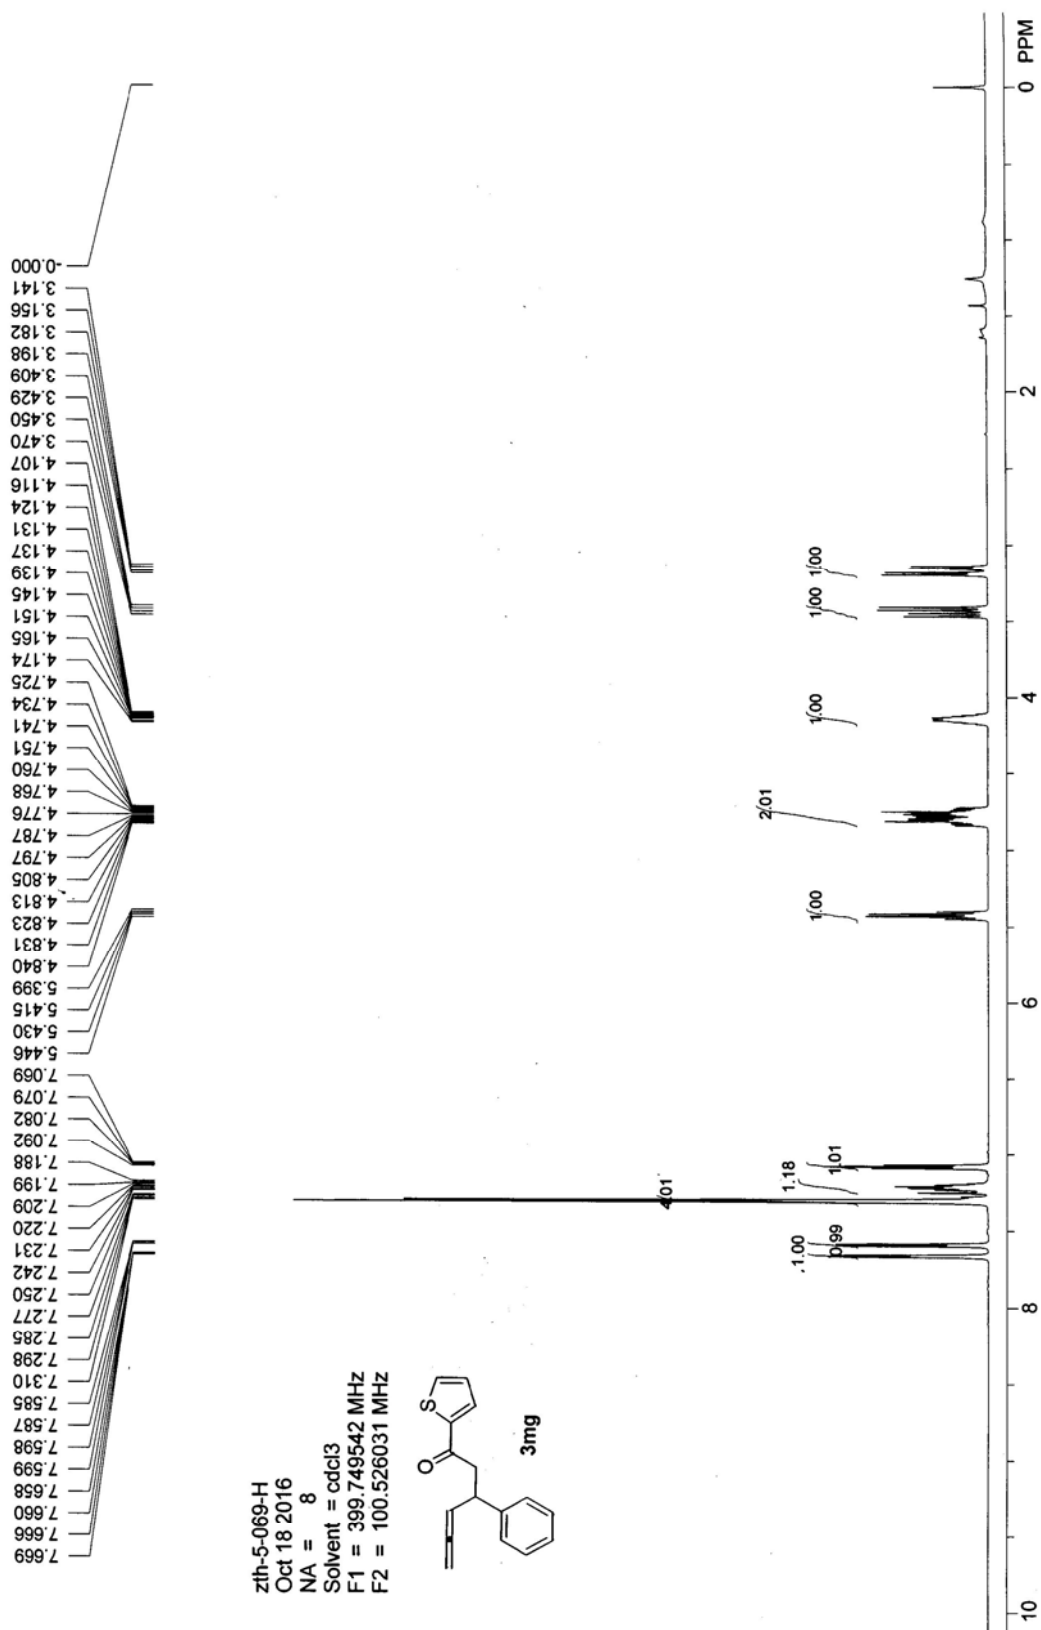



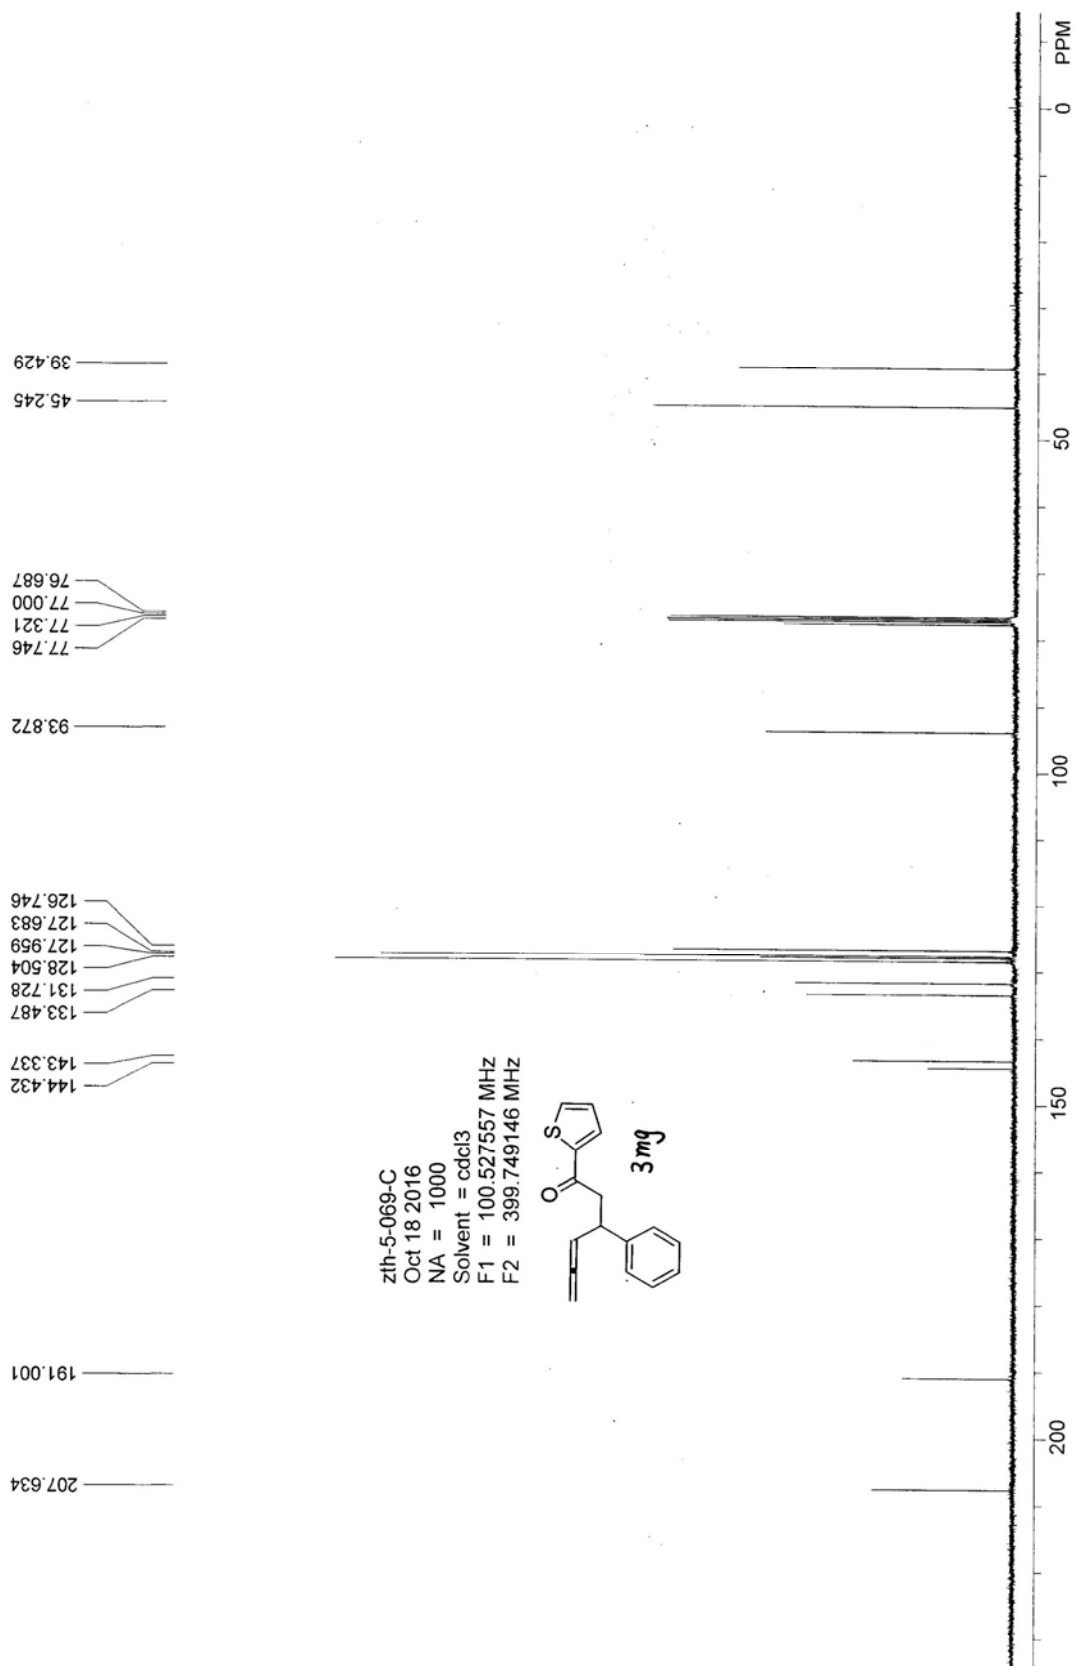

**3-(4-fluorophenyl)-1-(furan-2-yl)hexa-4,5-dien-1-one (3nh, zth-5-095)**

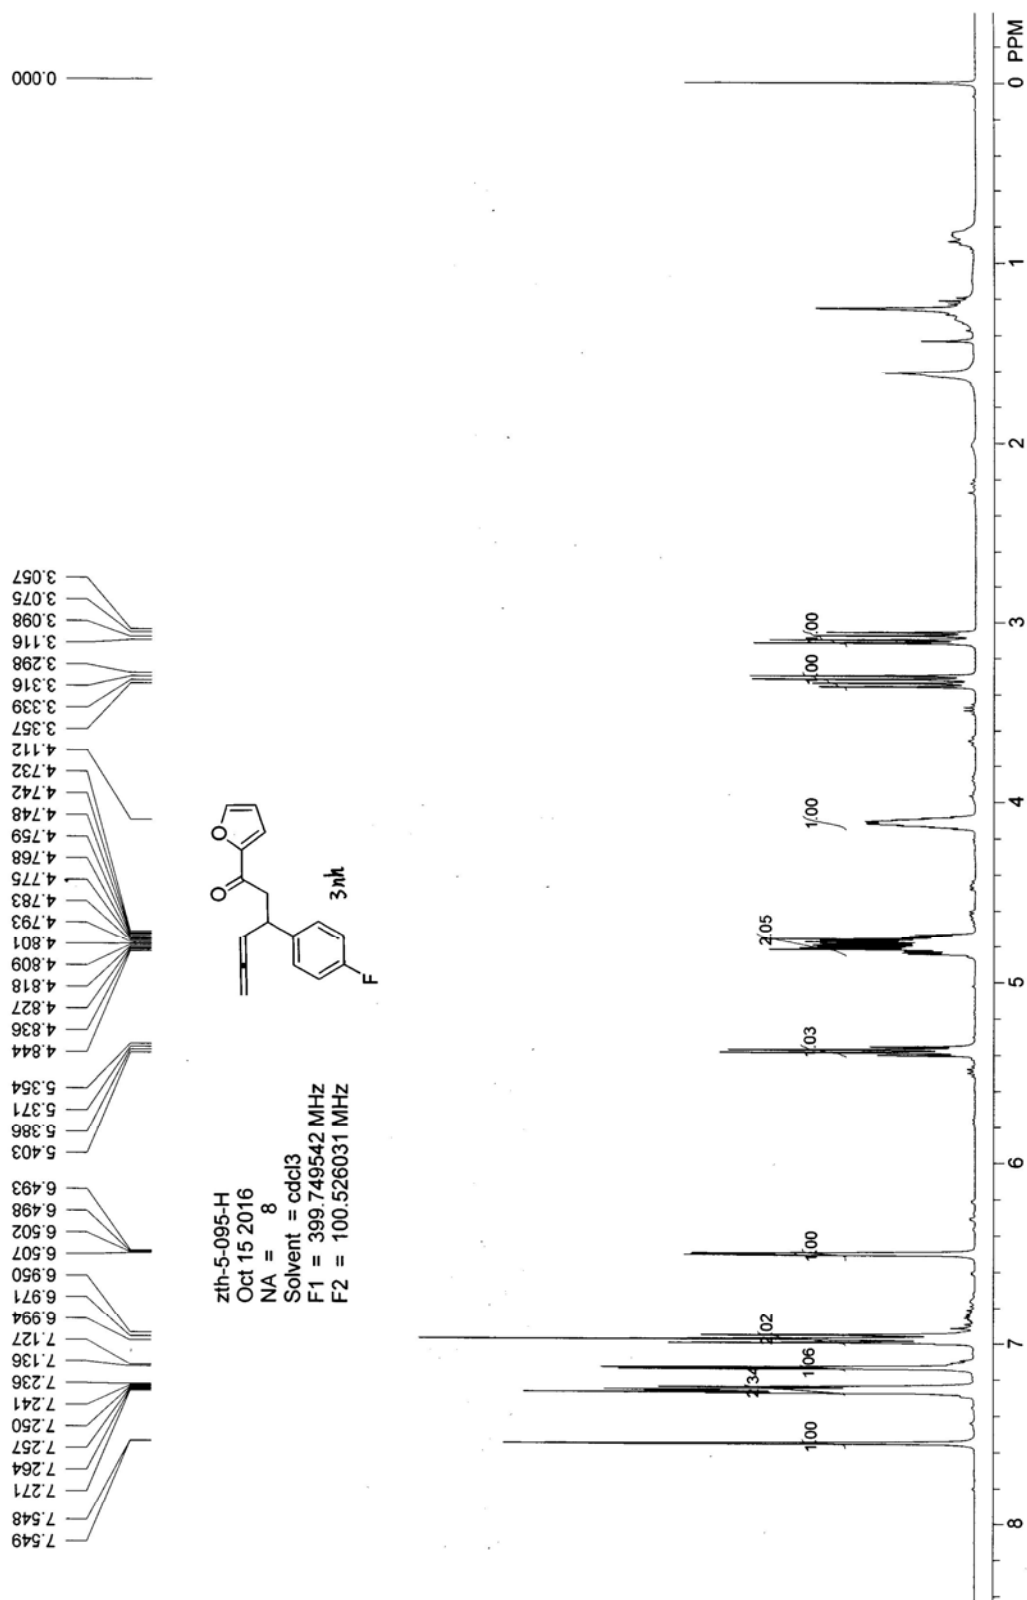

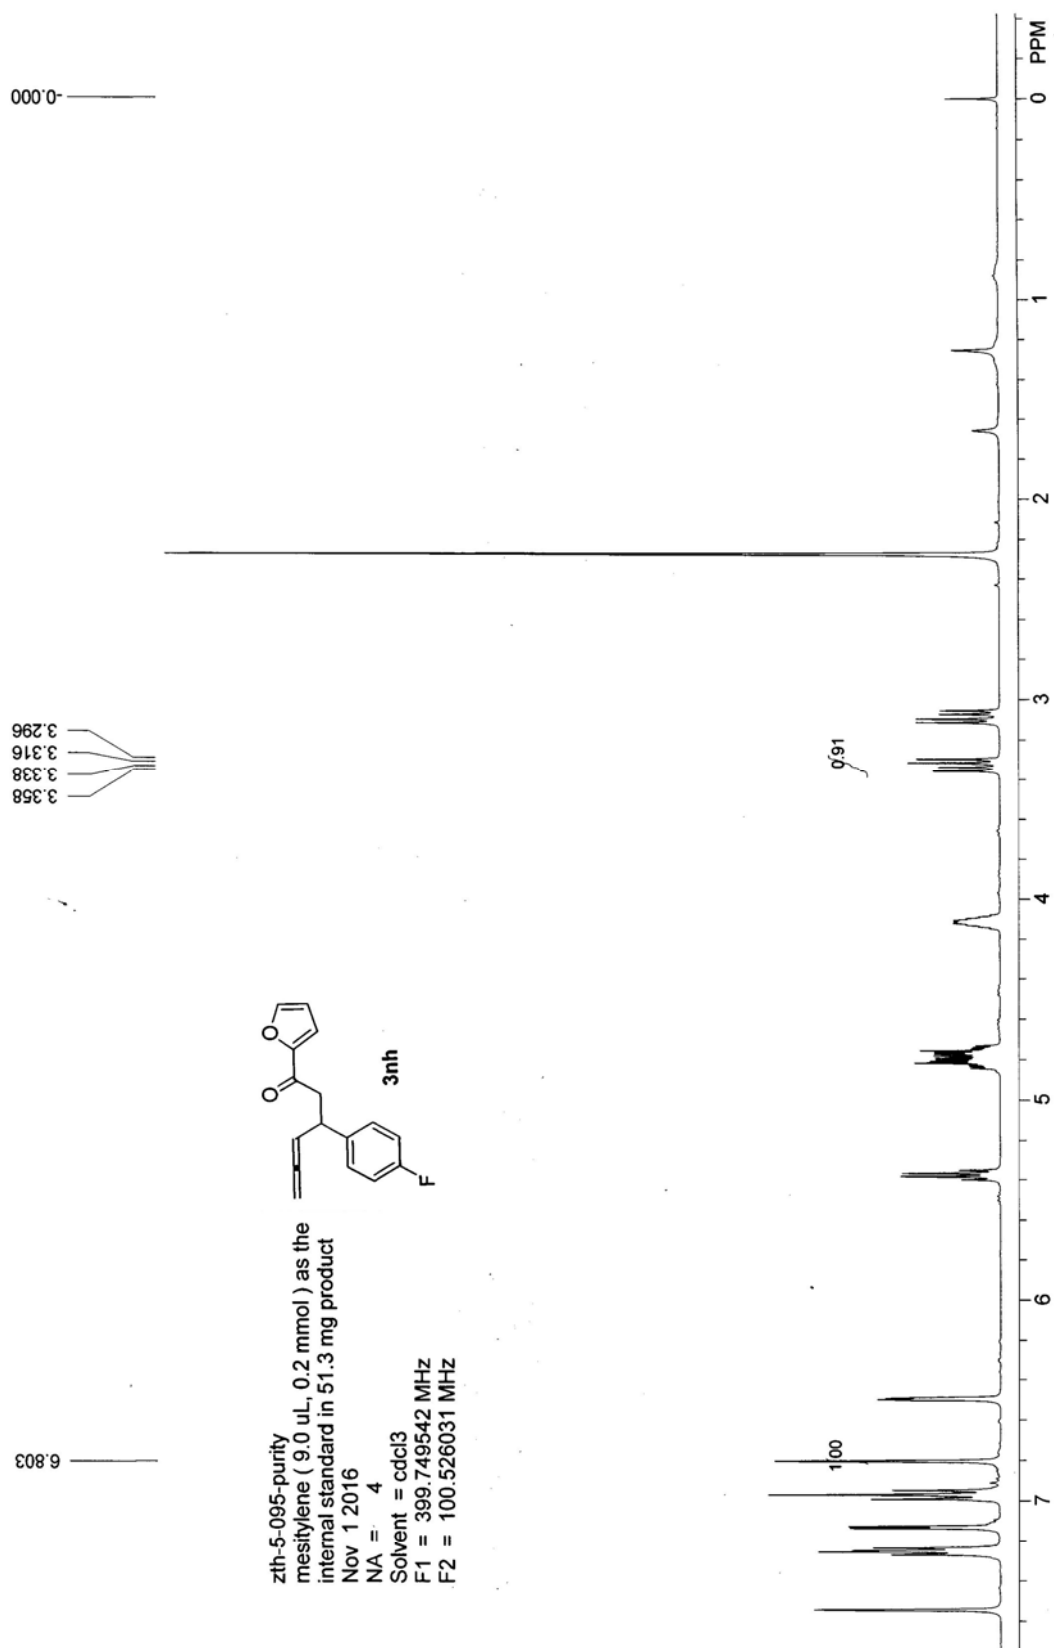

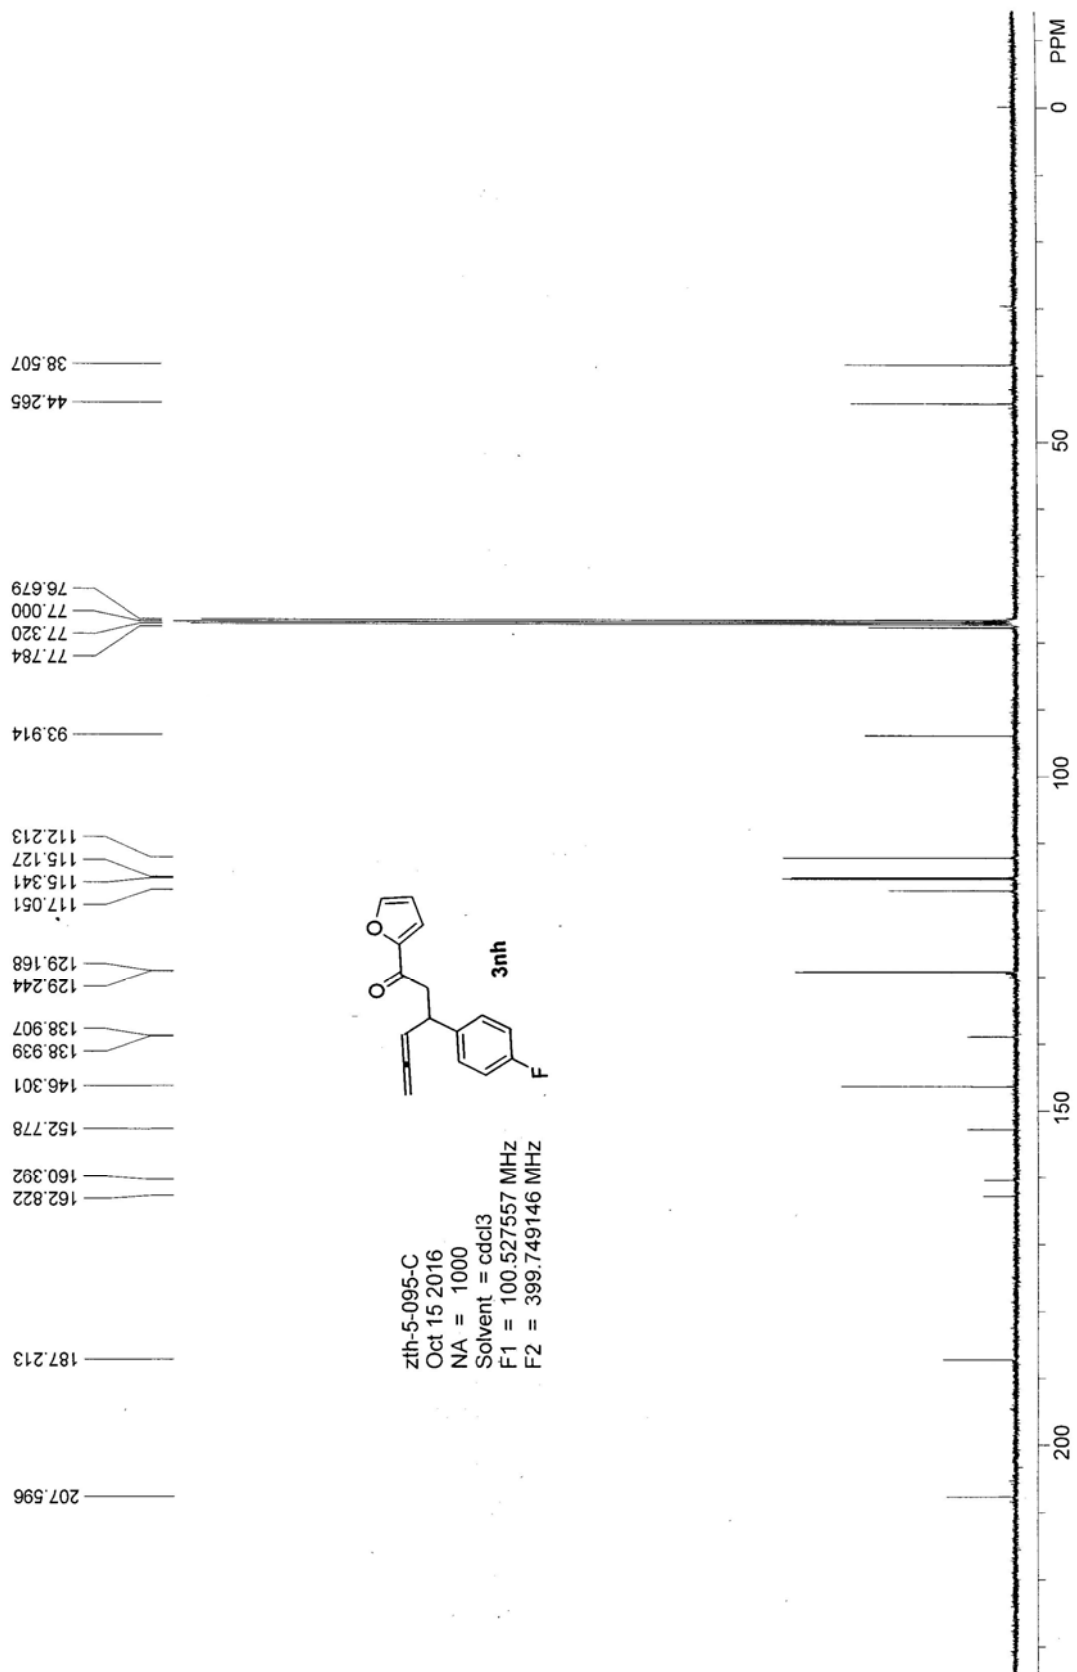

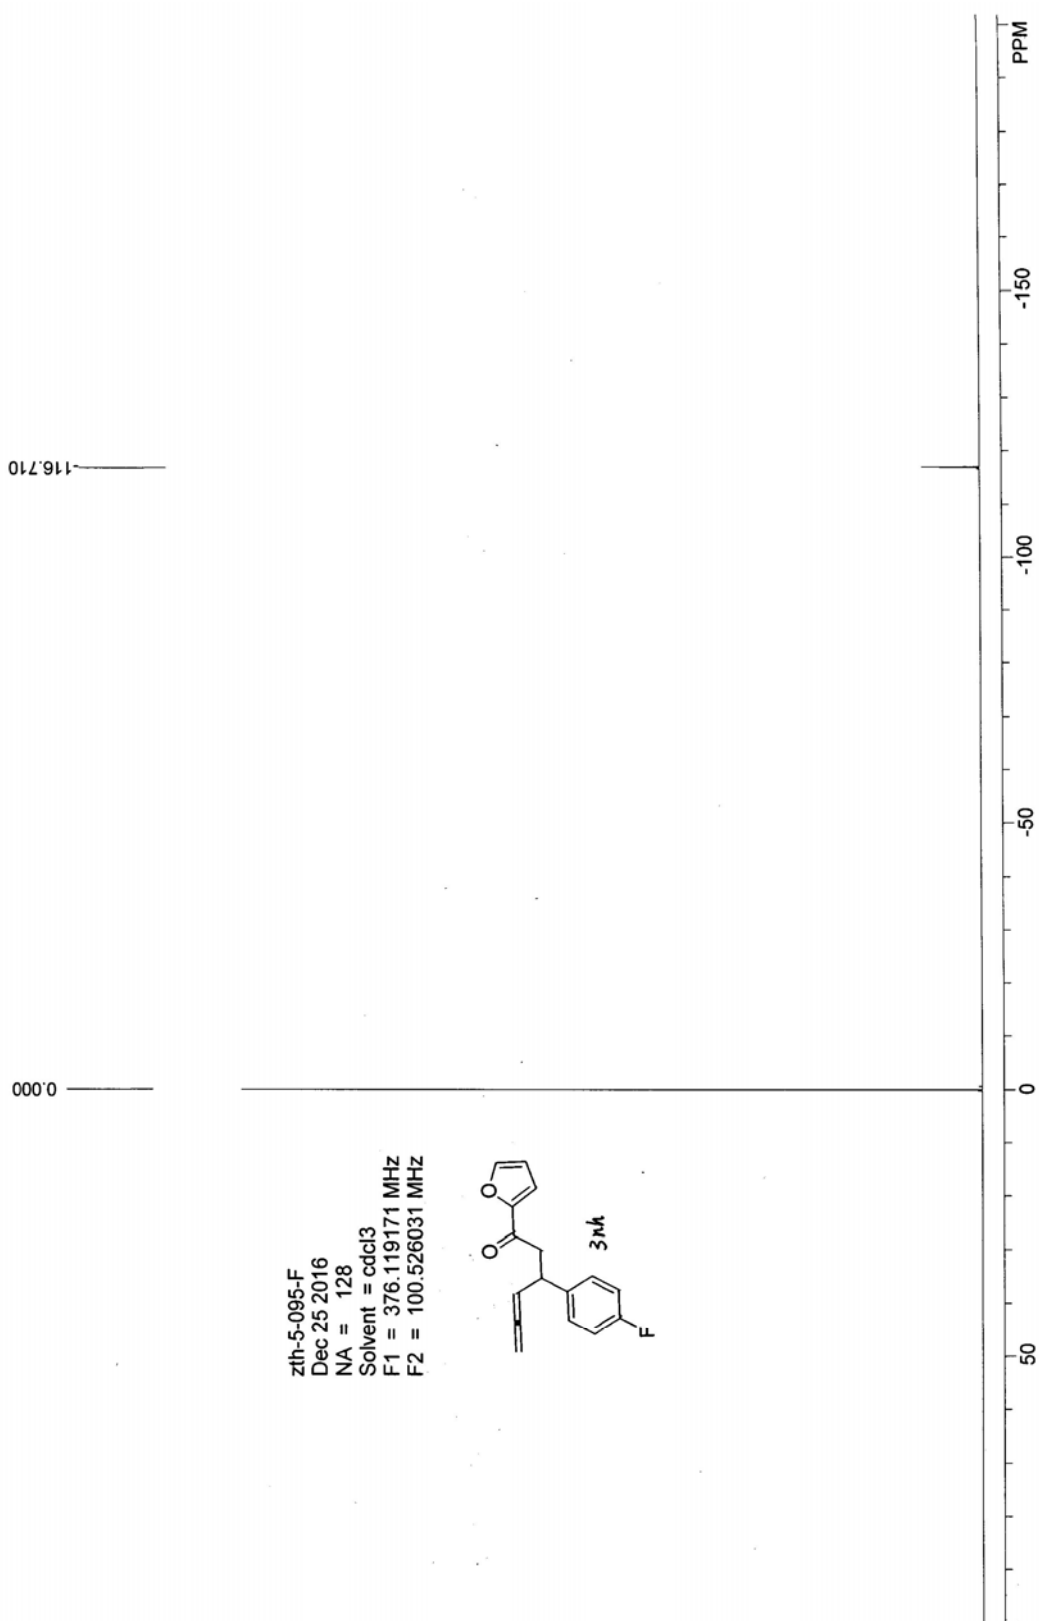

**3-(3-bromophenyl)-1-phenylhexa-4,5-dien-1-one (3oa, zth-4-130)**

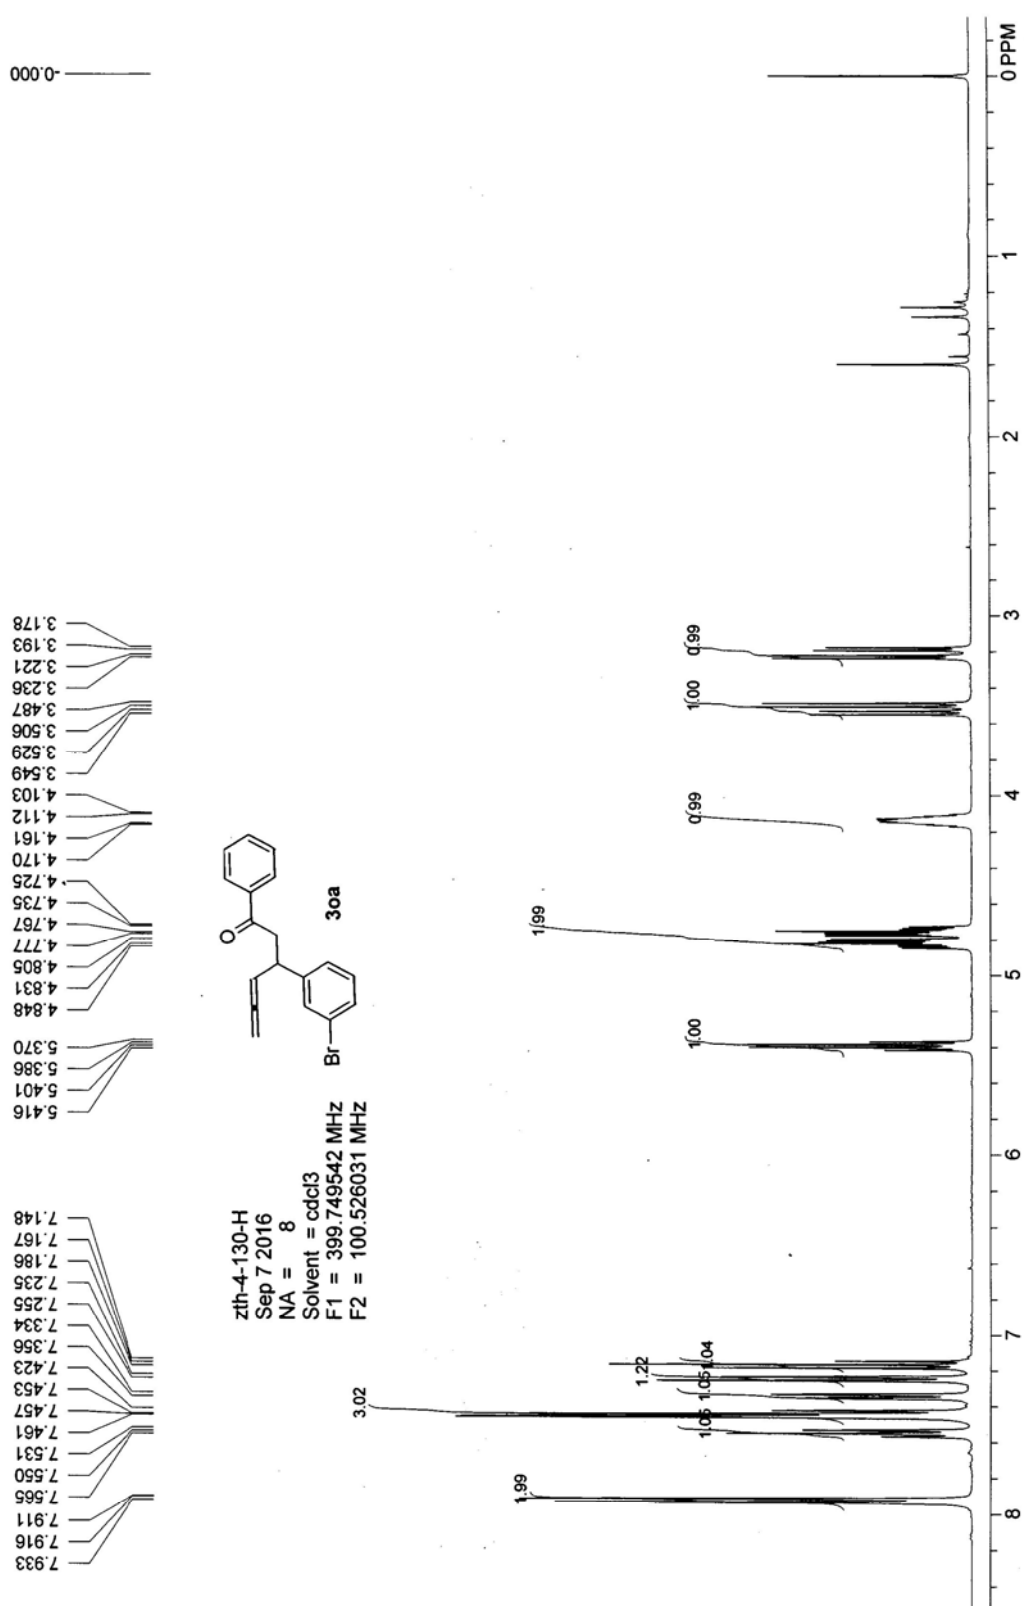

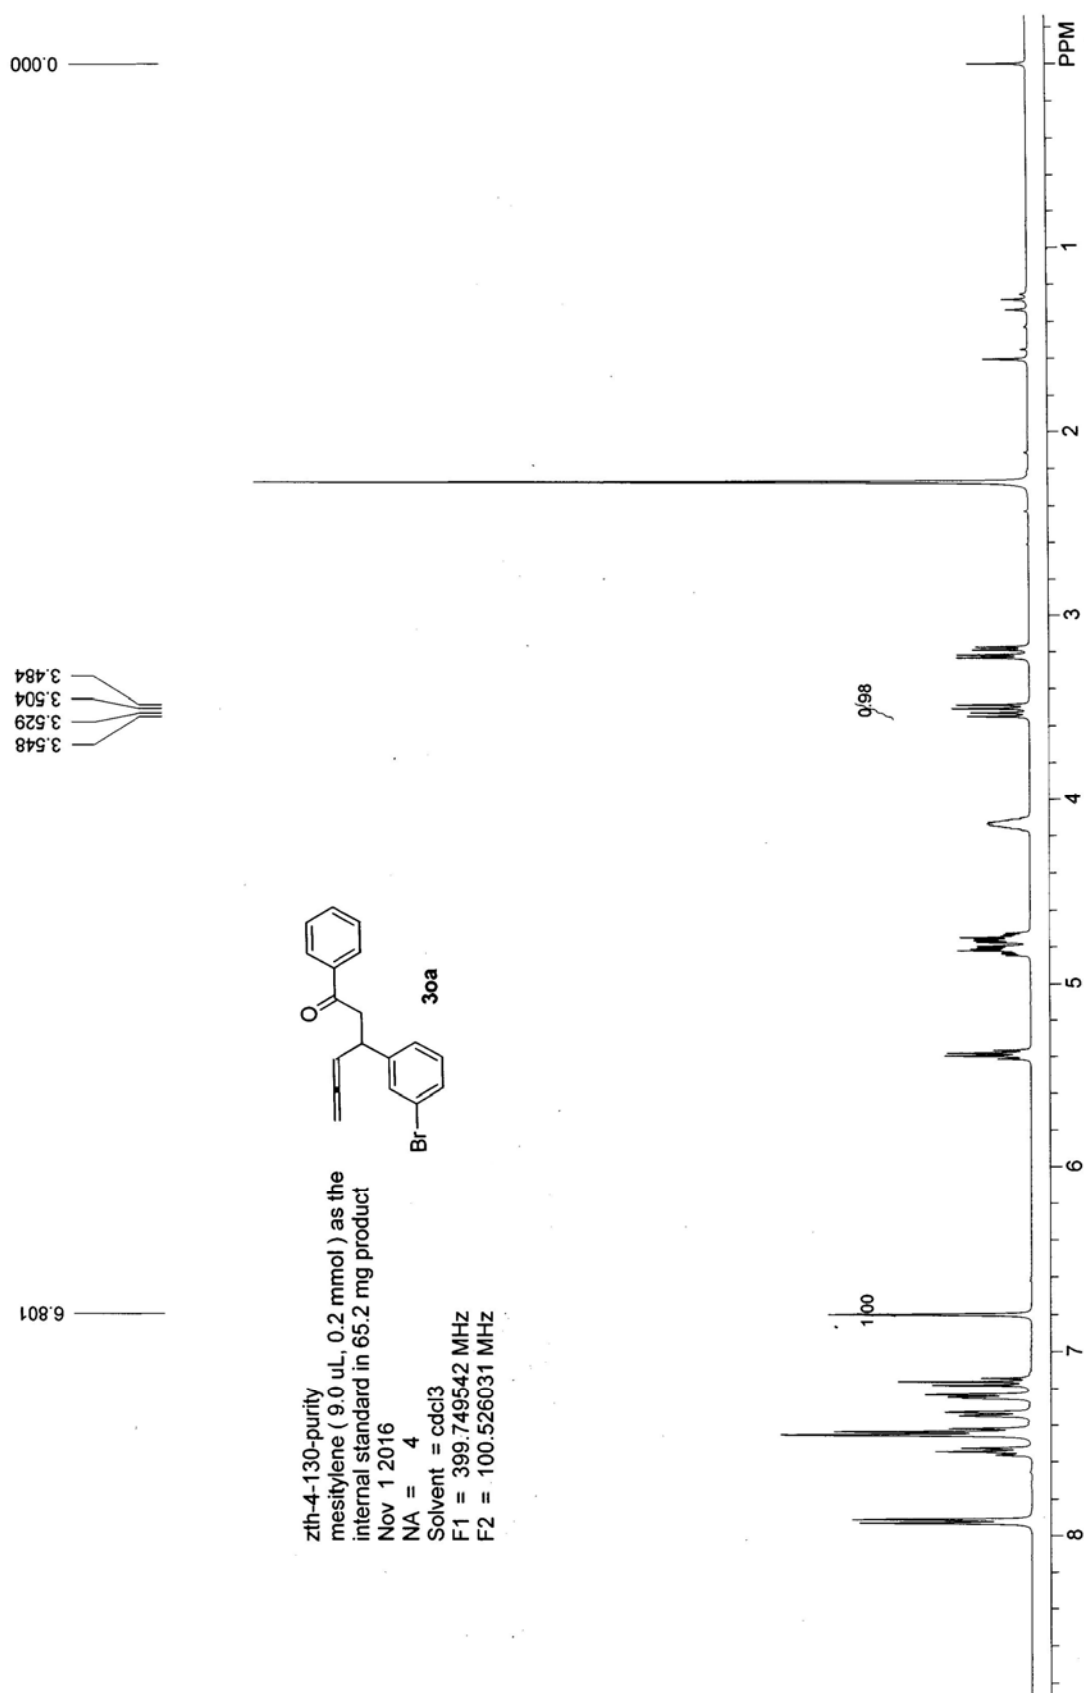

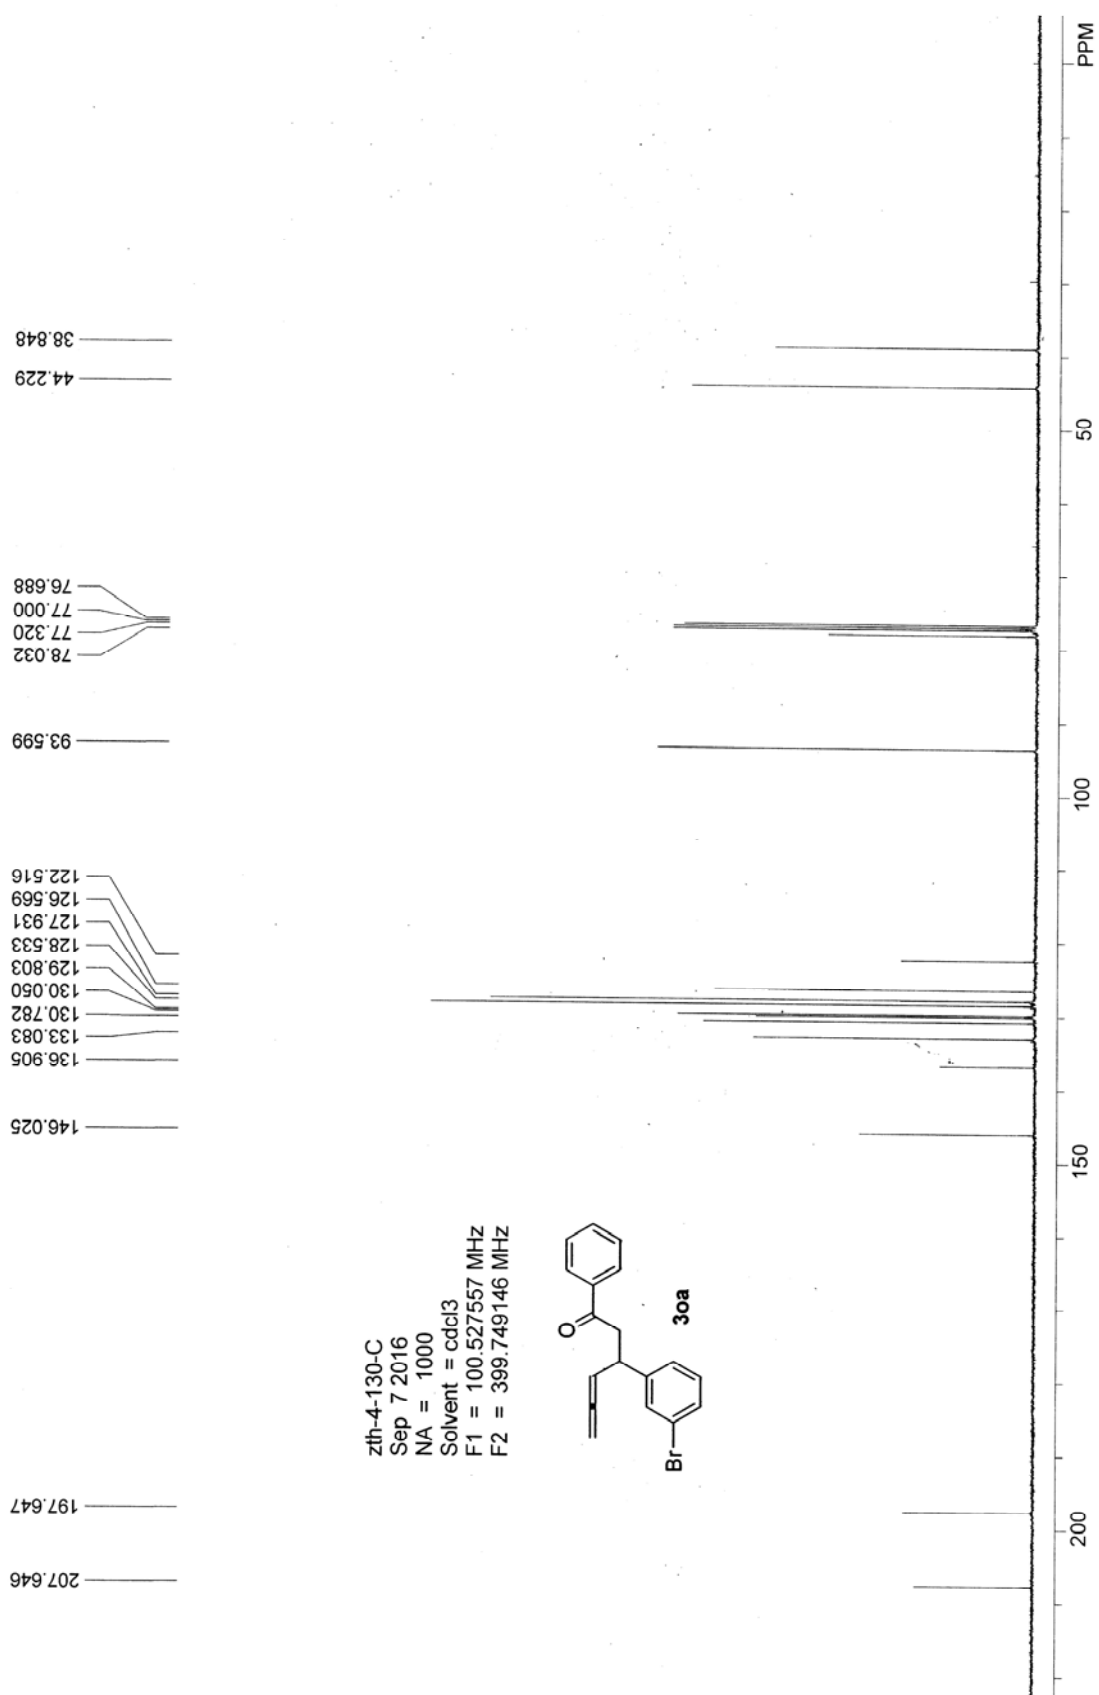



3-(4-bromophenyl)-1-phenylhexa-4,5-dien-1-one (3pa, zth-4-129)

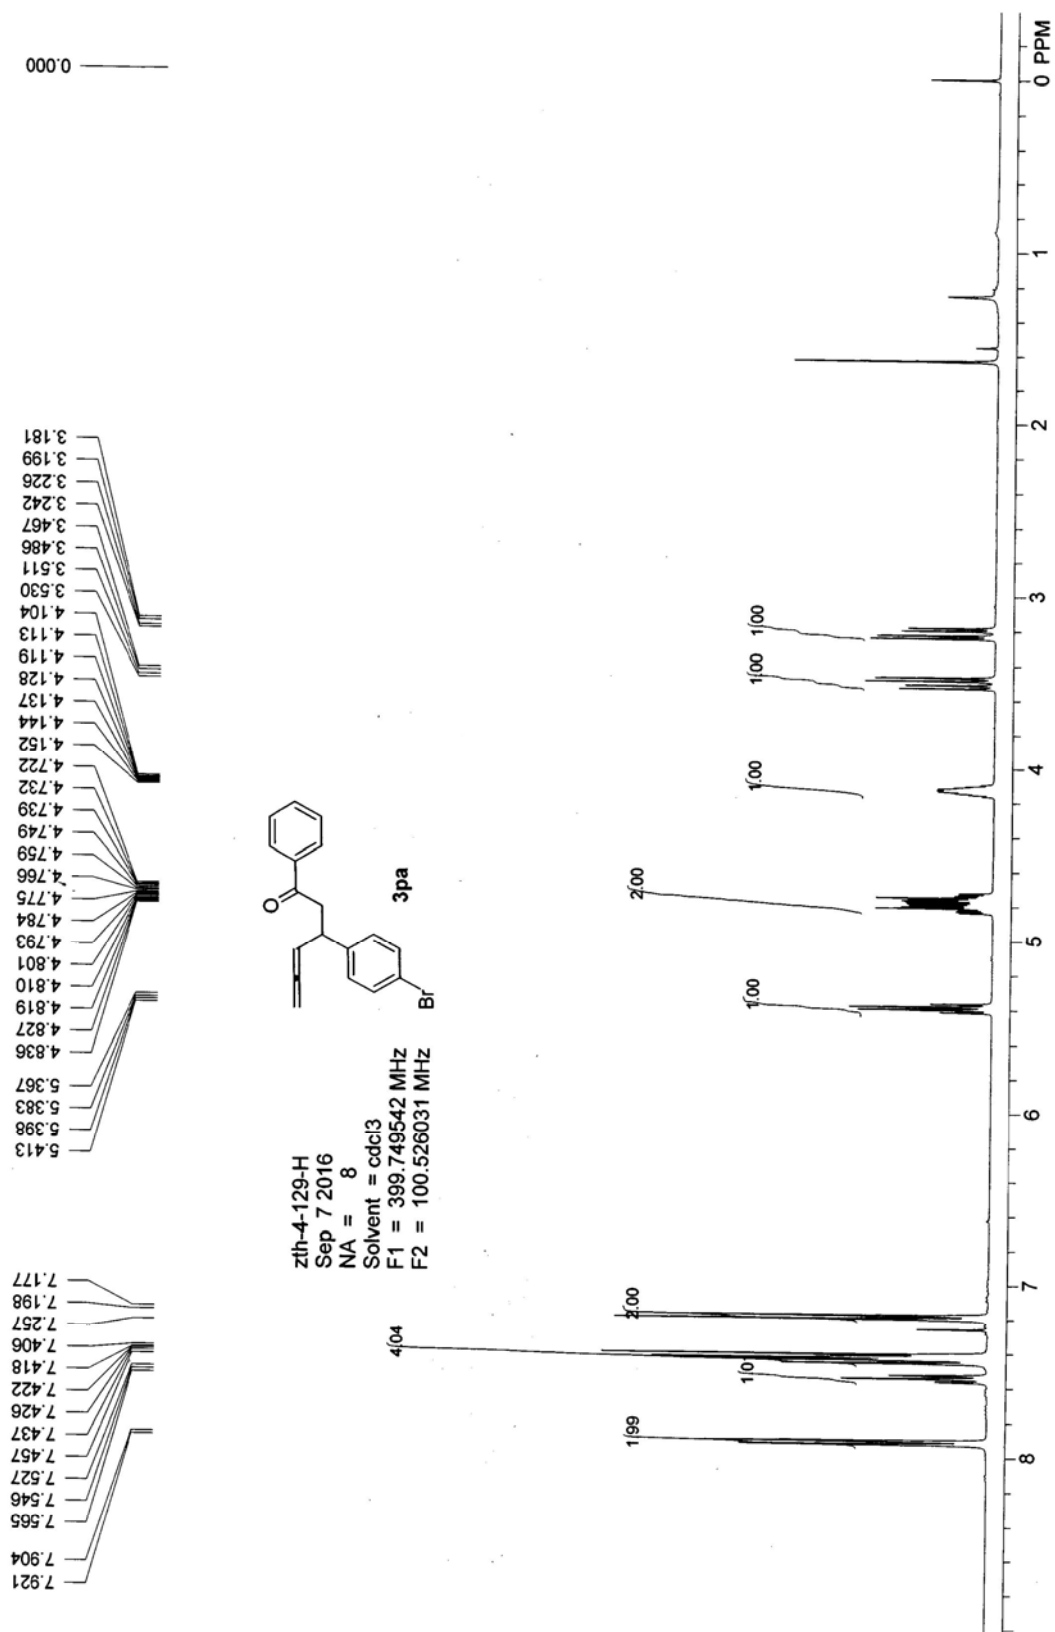

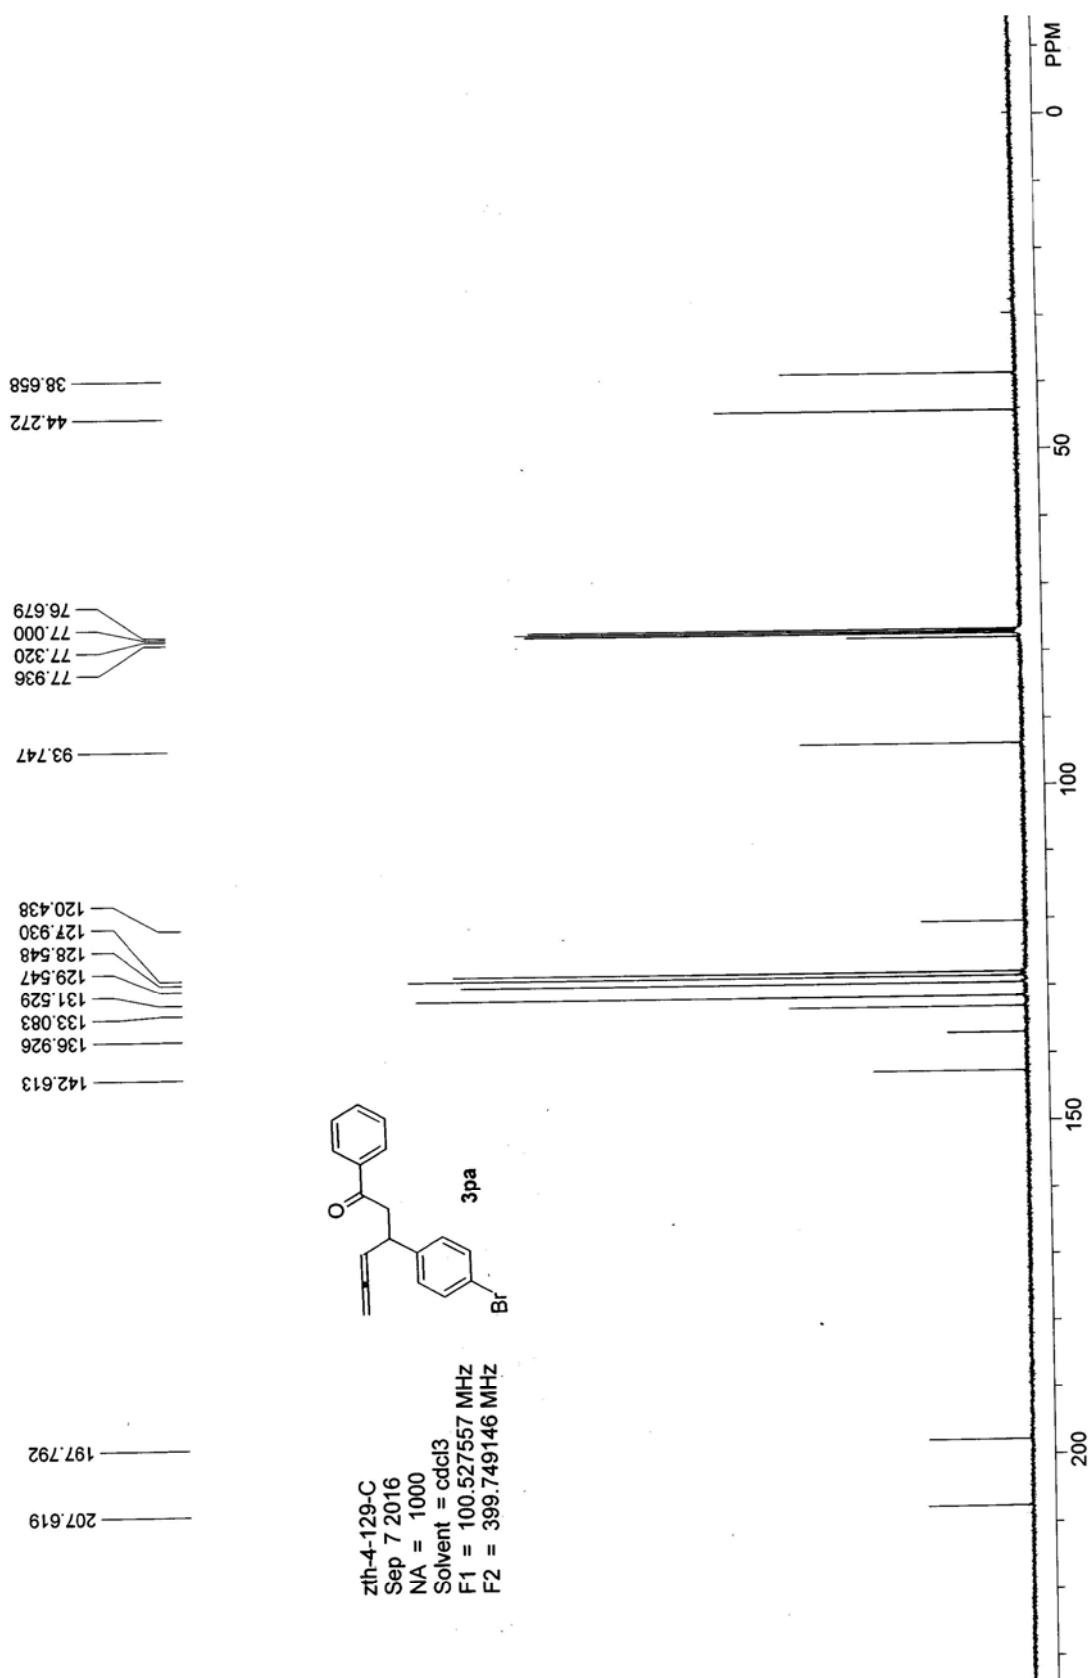

**3-(4-(methoxycarbonylphenyl)-1-phenylhexa-4,5-dien-1-one (3pa, zth-4-136)**

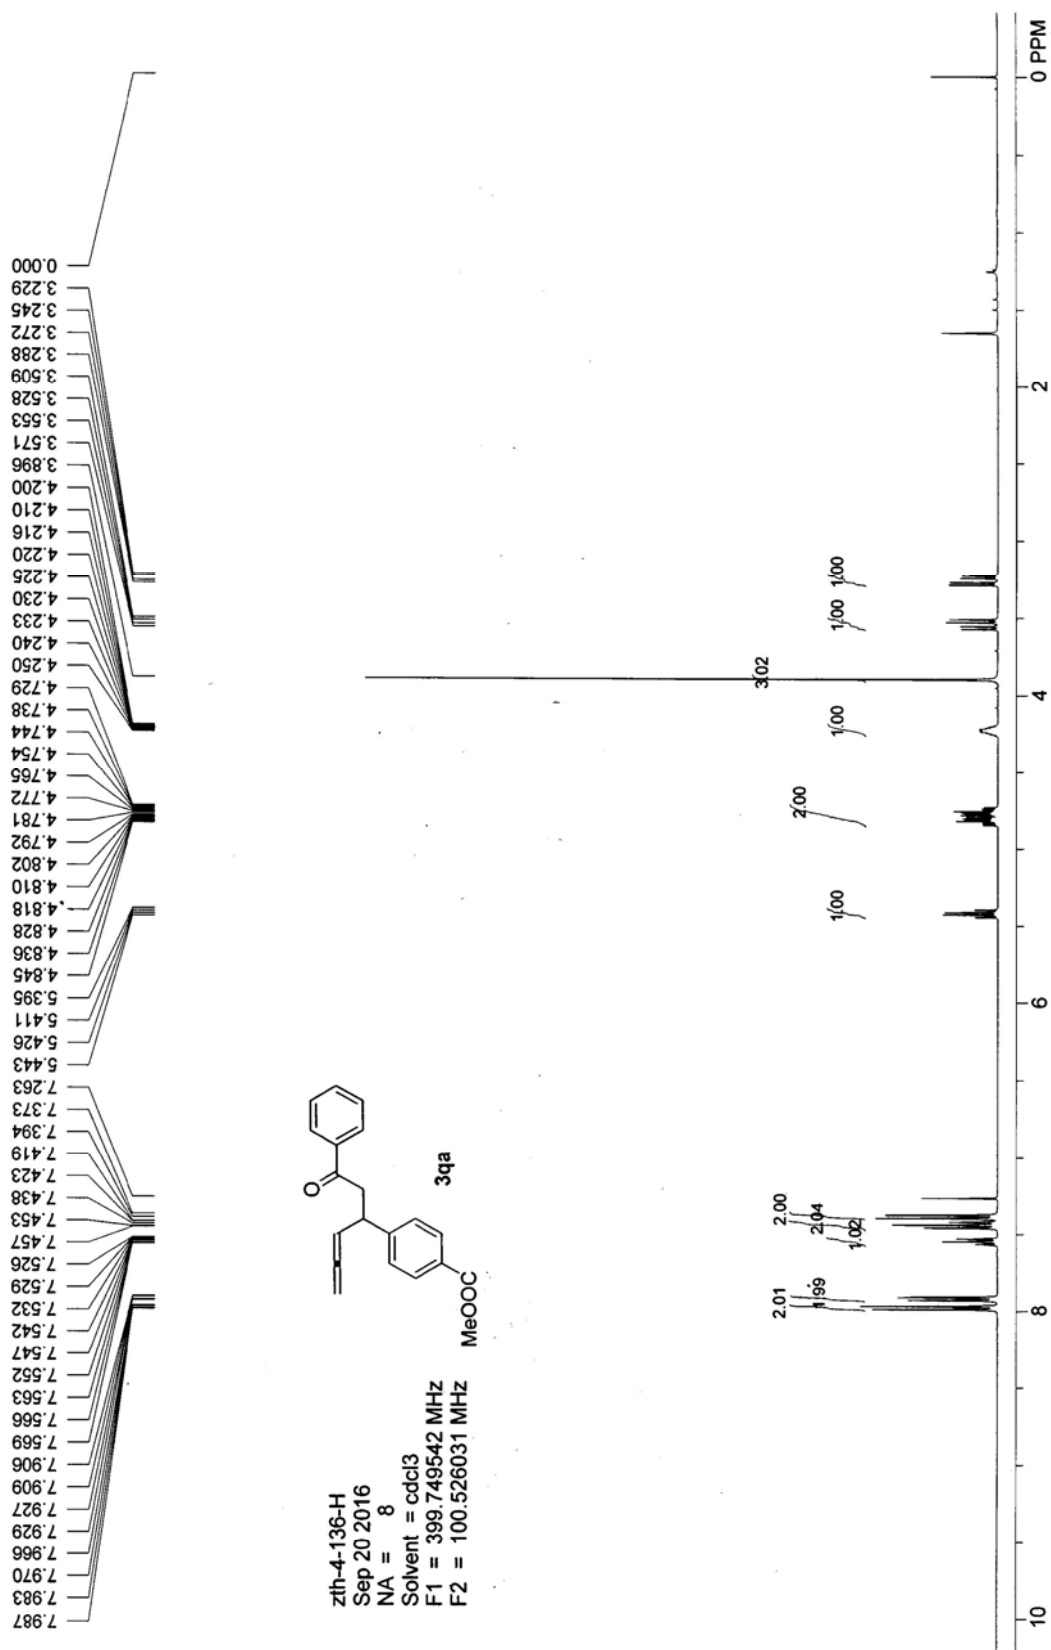

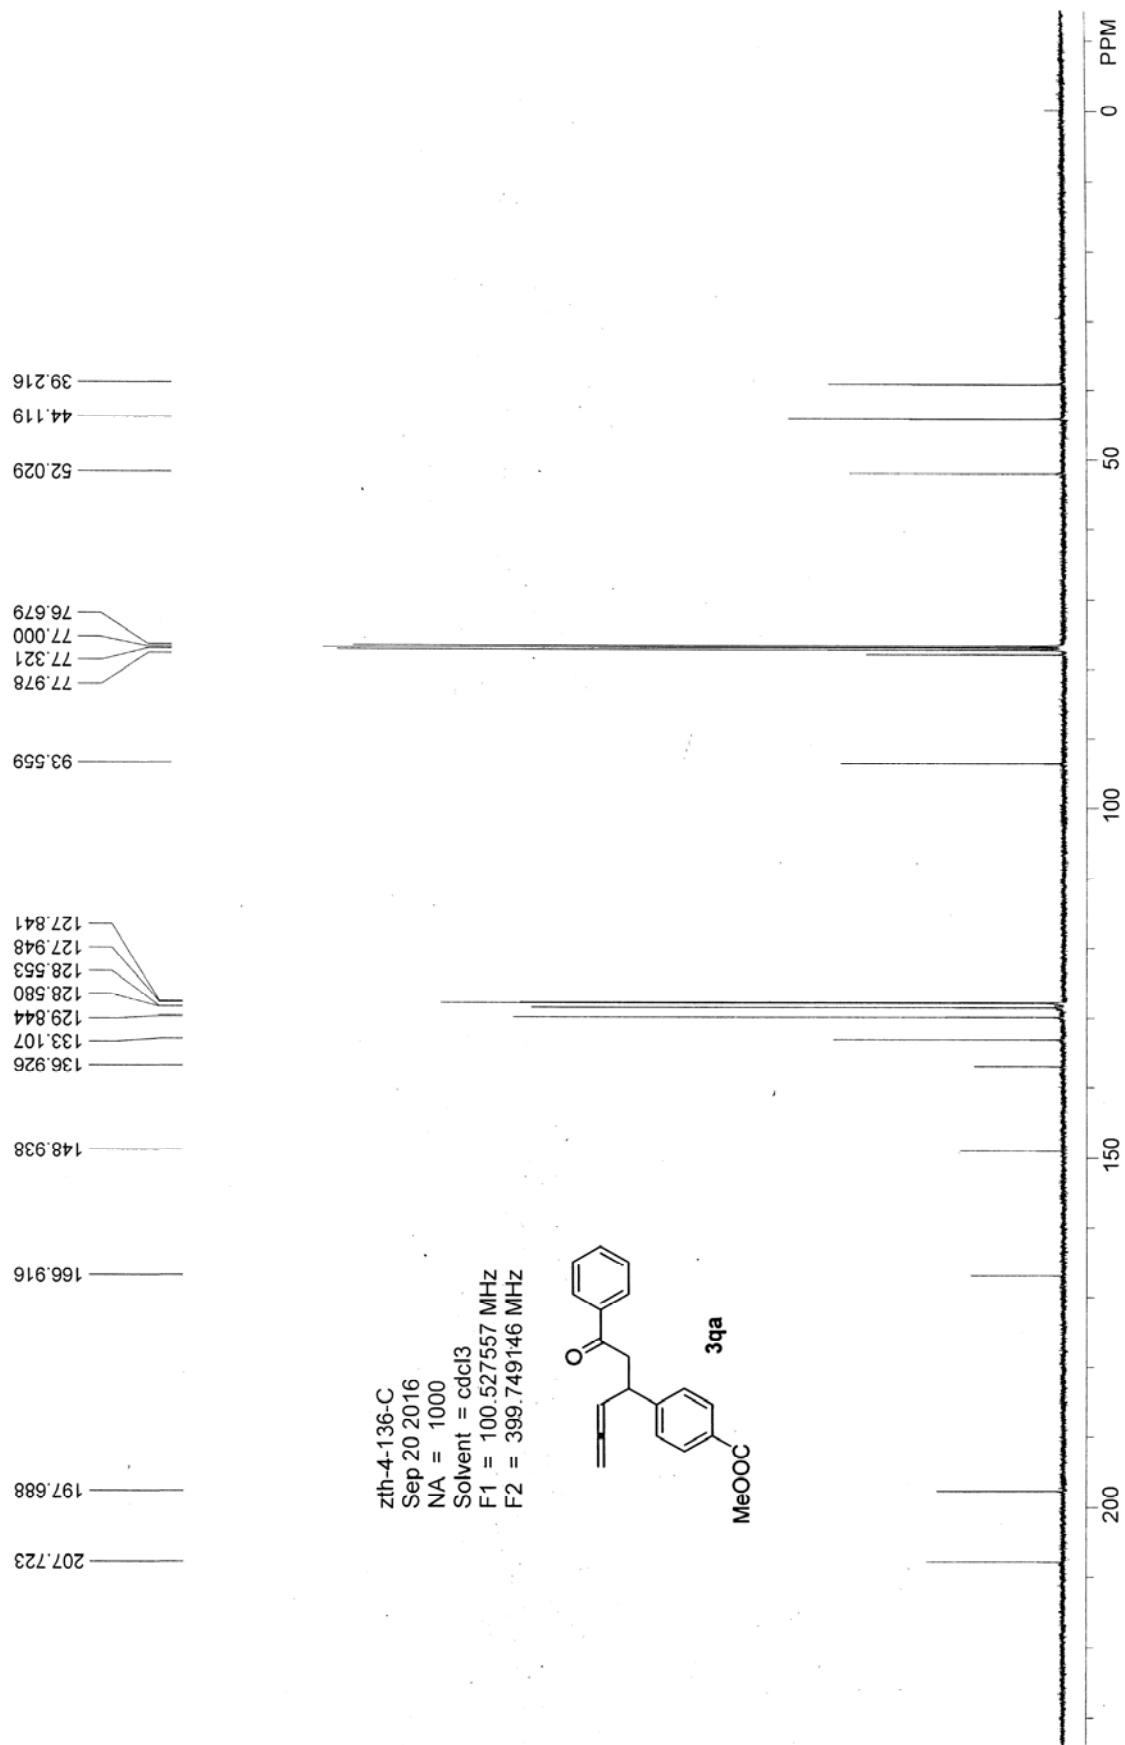

zth-4-137-H  
Sep 20 2016  
NA = 8  
Solvent = cdcl3  
F1 = 399.749542 MHz  
F2 = 100.526031 MHz

3ra

0 PPM

0.000

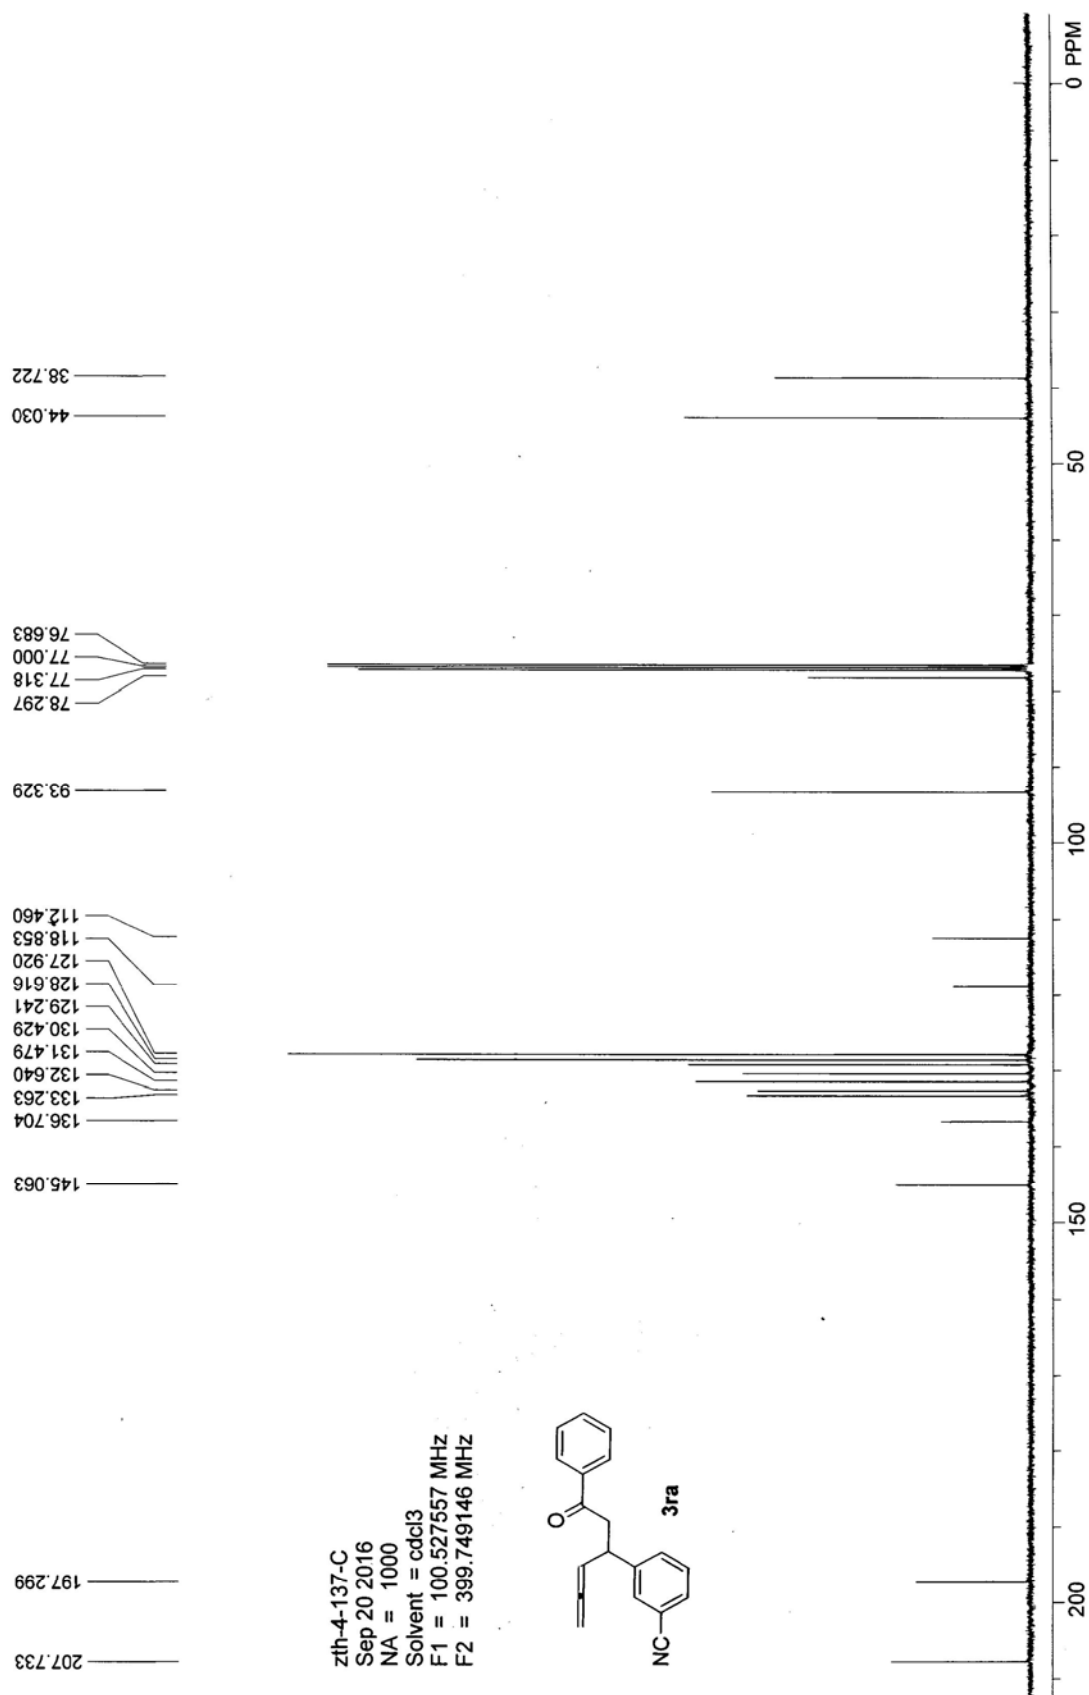

zth-4-137-C  
 Sep 20 2016  
 NA = 1000  
 Solvent = cdcl3  
 F1 = 100.527557 MHz  
 F2 = 399.749146 MHz

1-(naphthalen-2-yl)-3-(propa-1,2-dienyl)undec-4-yn-1-one (3si, zth-5-096)

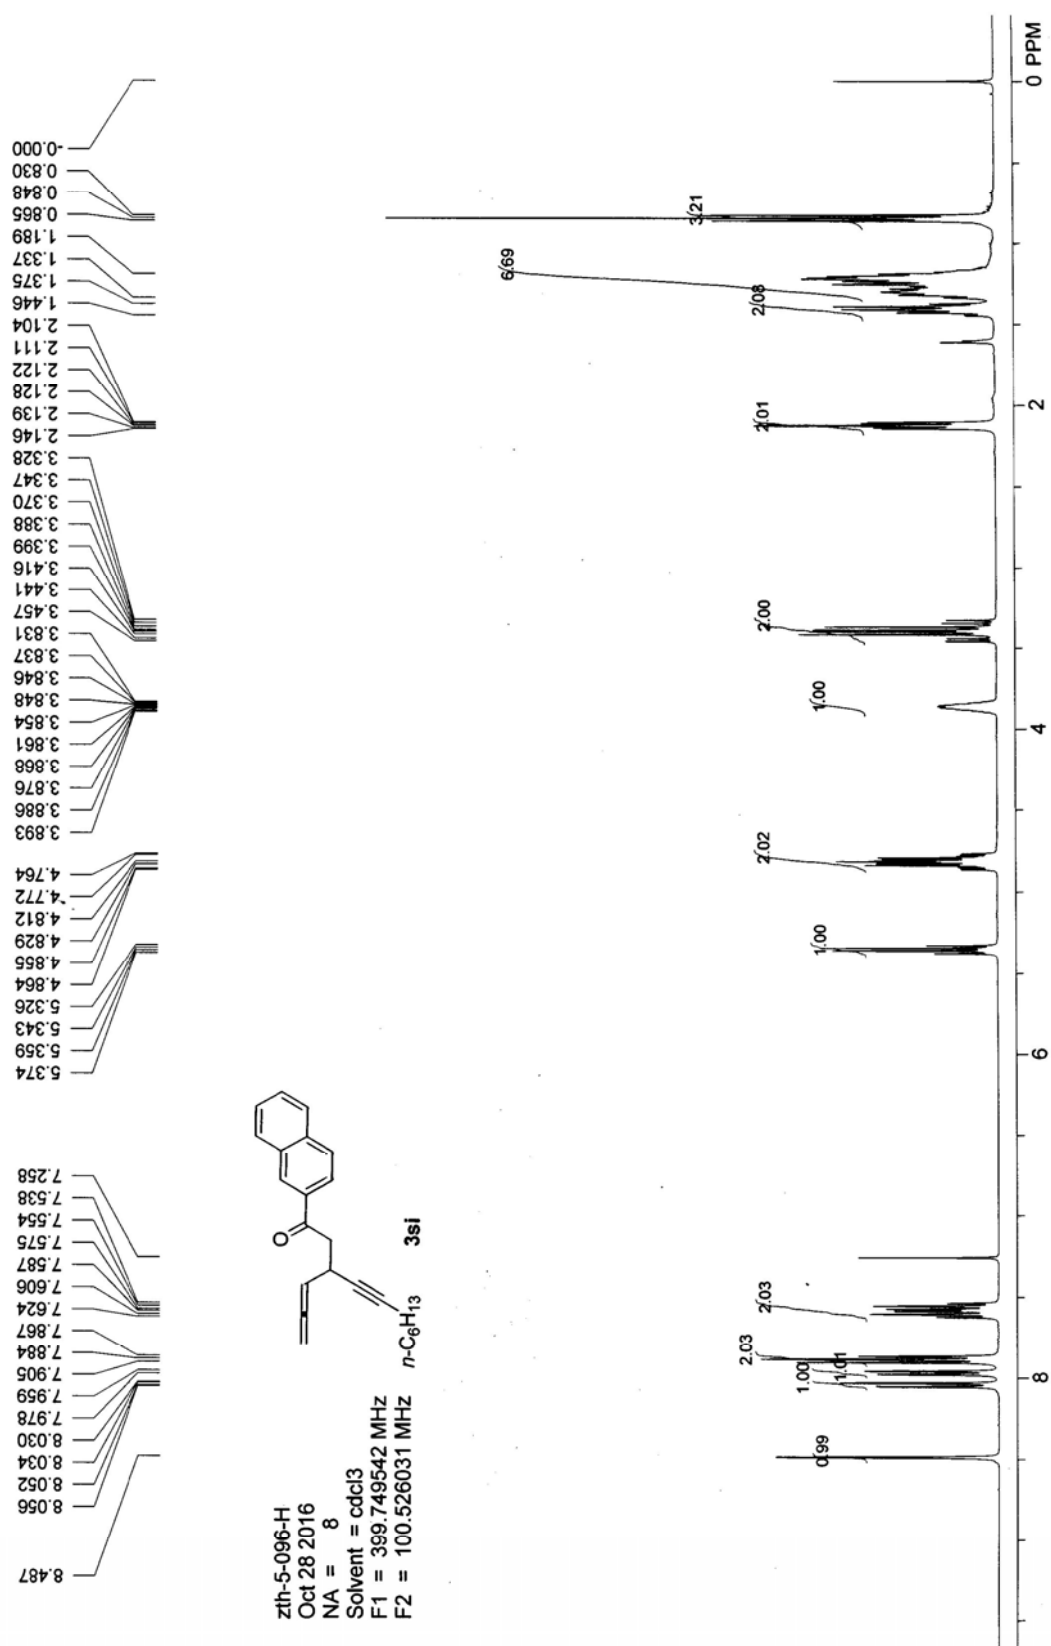

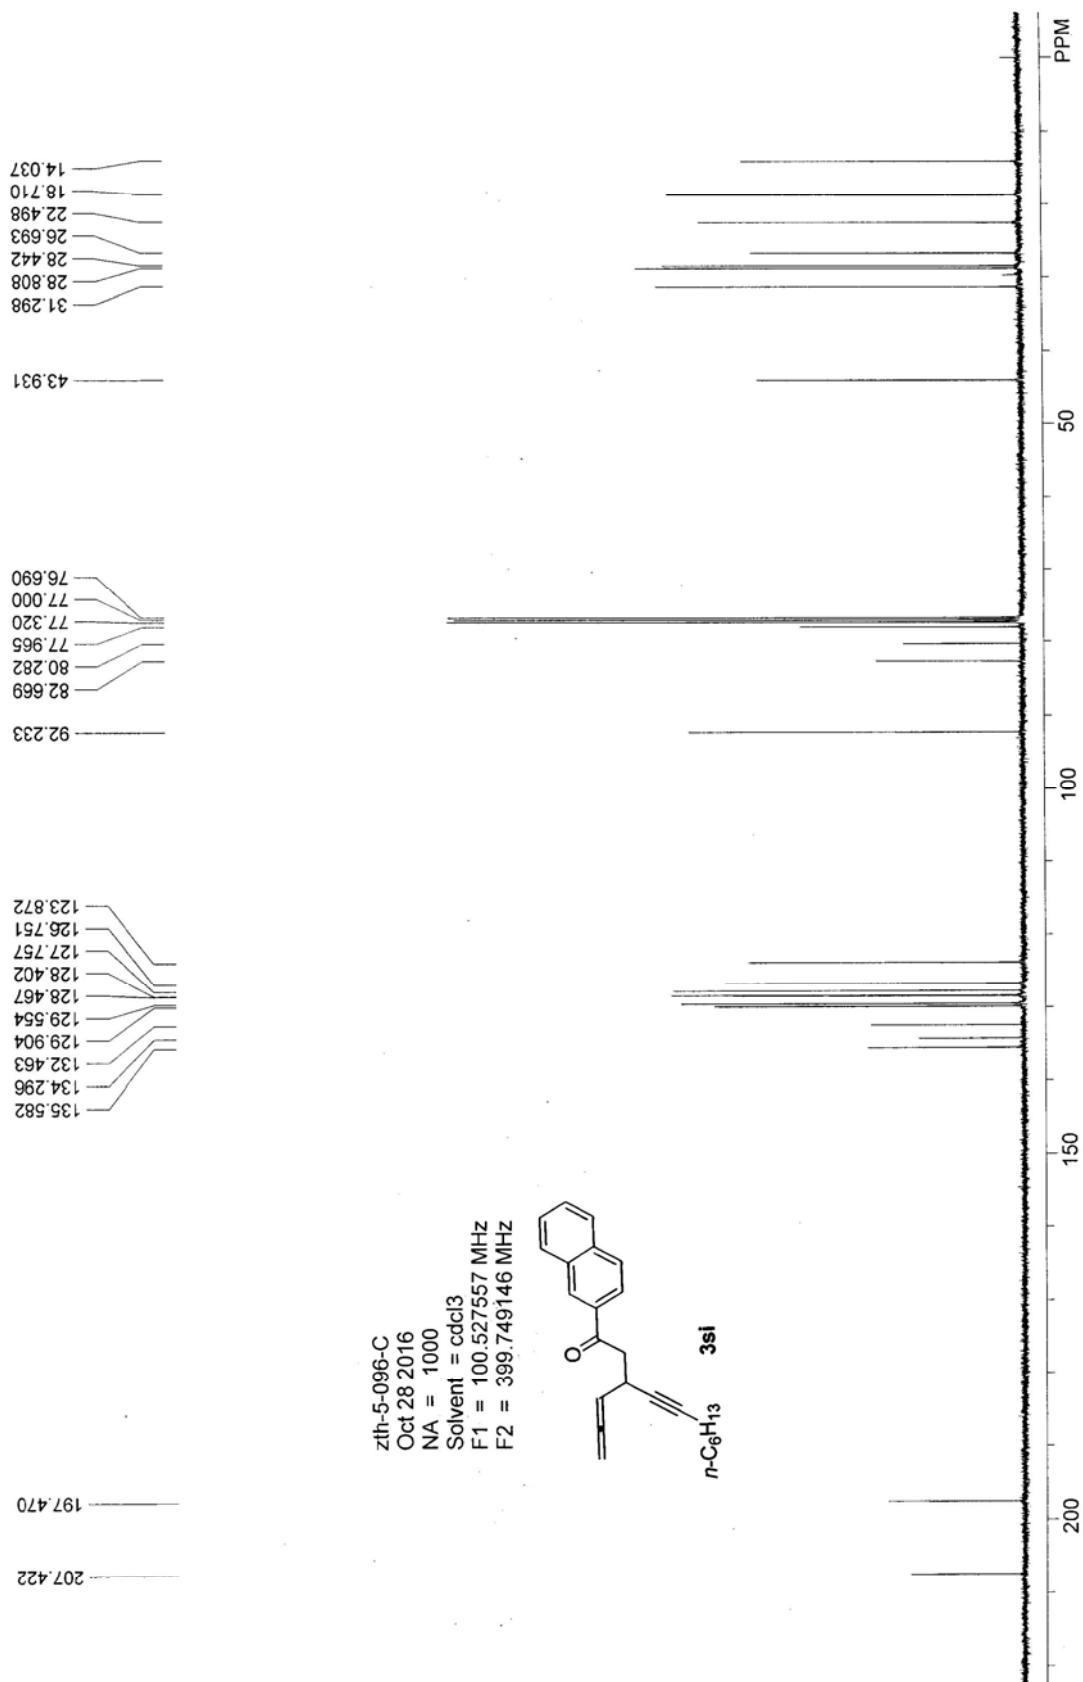



acetophenone-D (4a-D, zth-6-094)

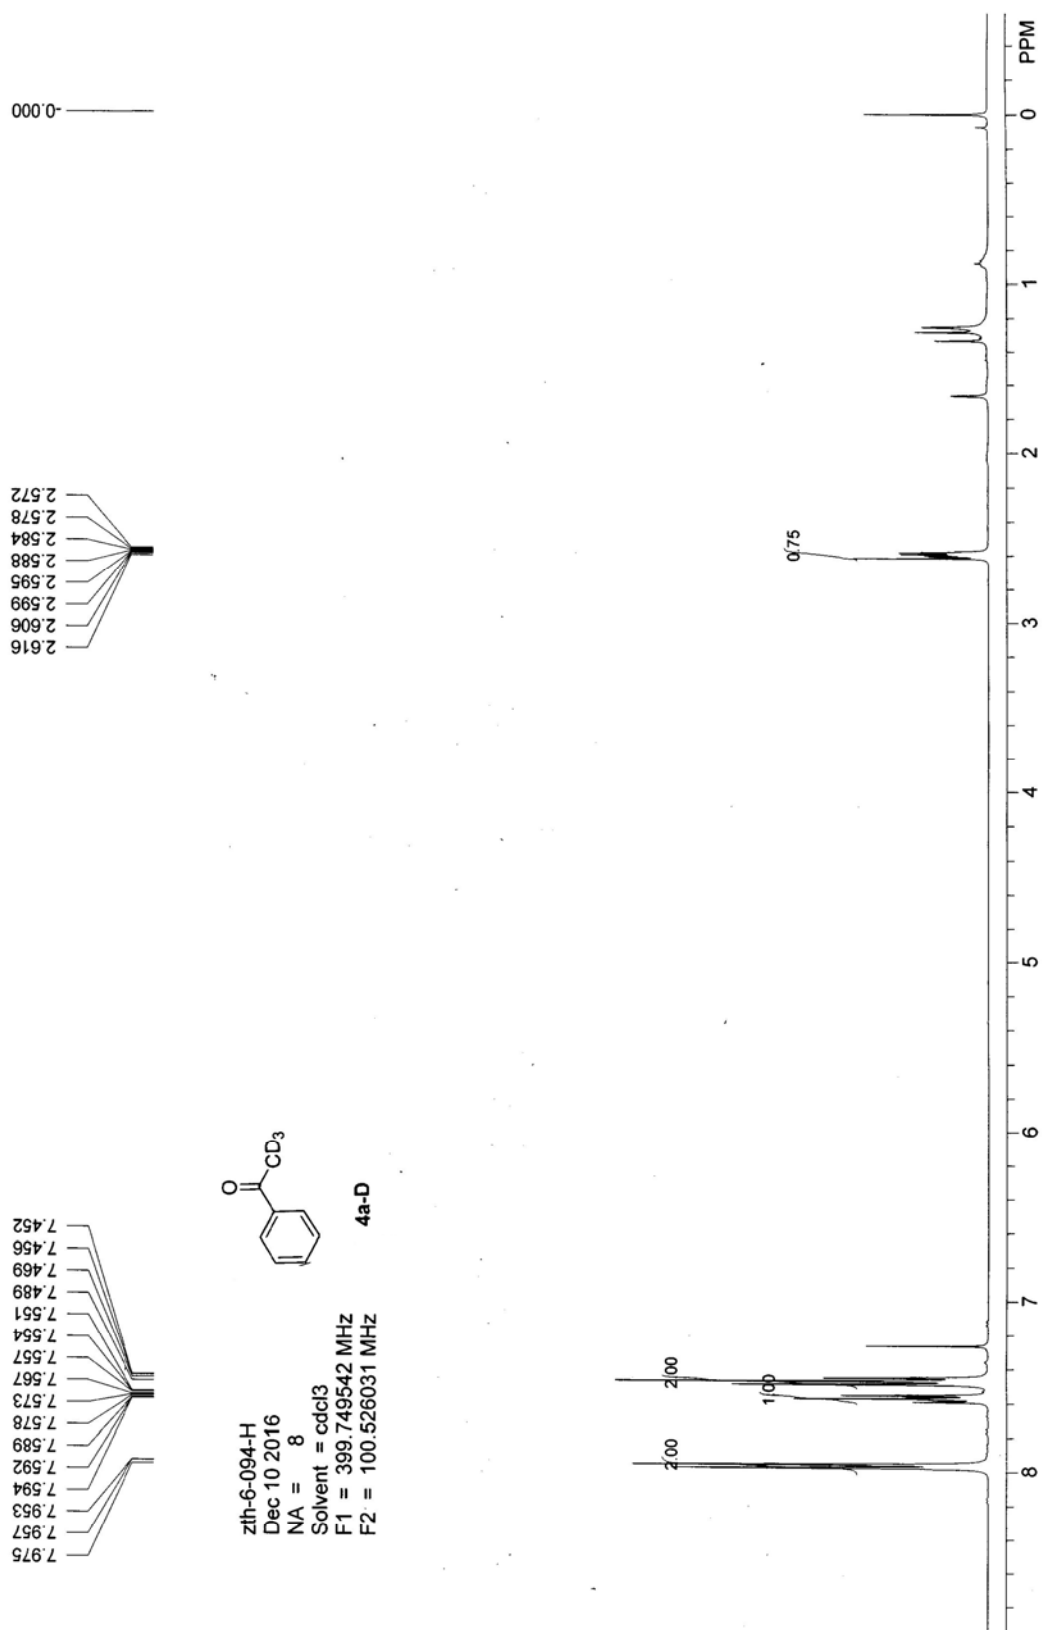

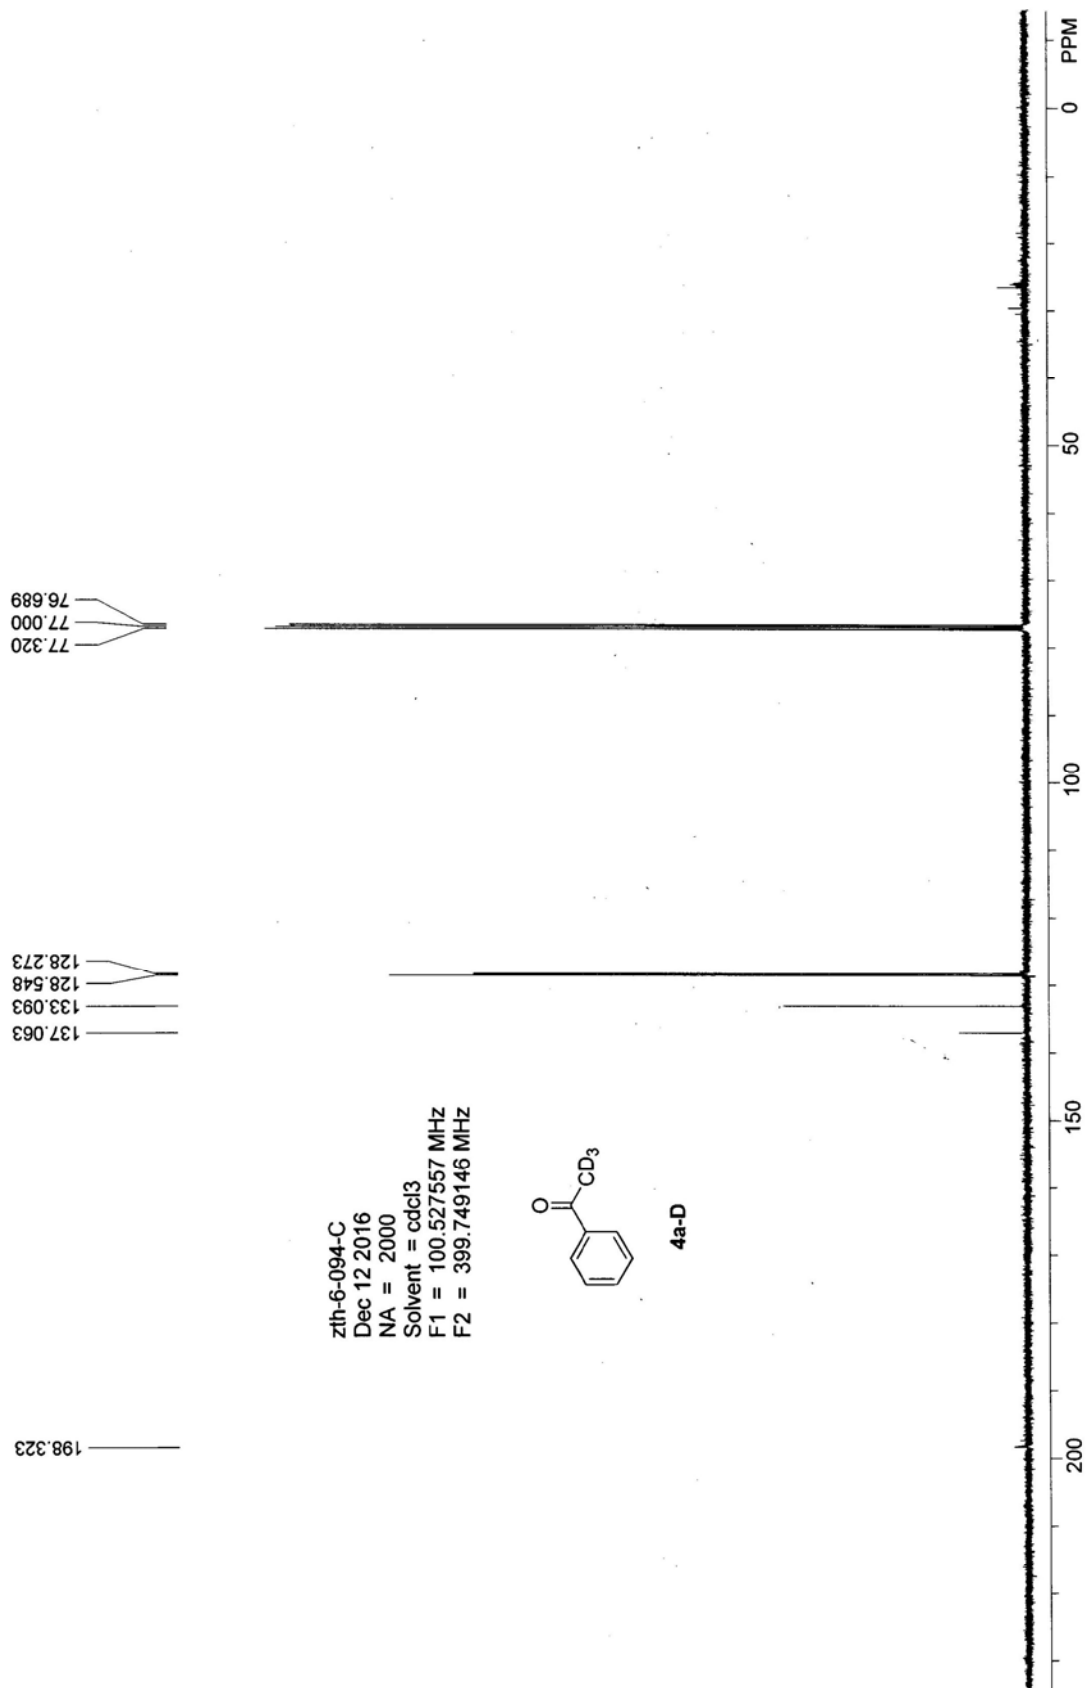

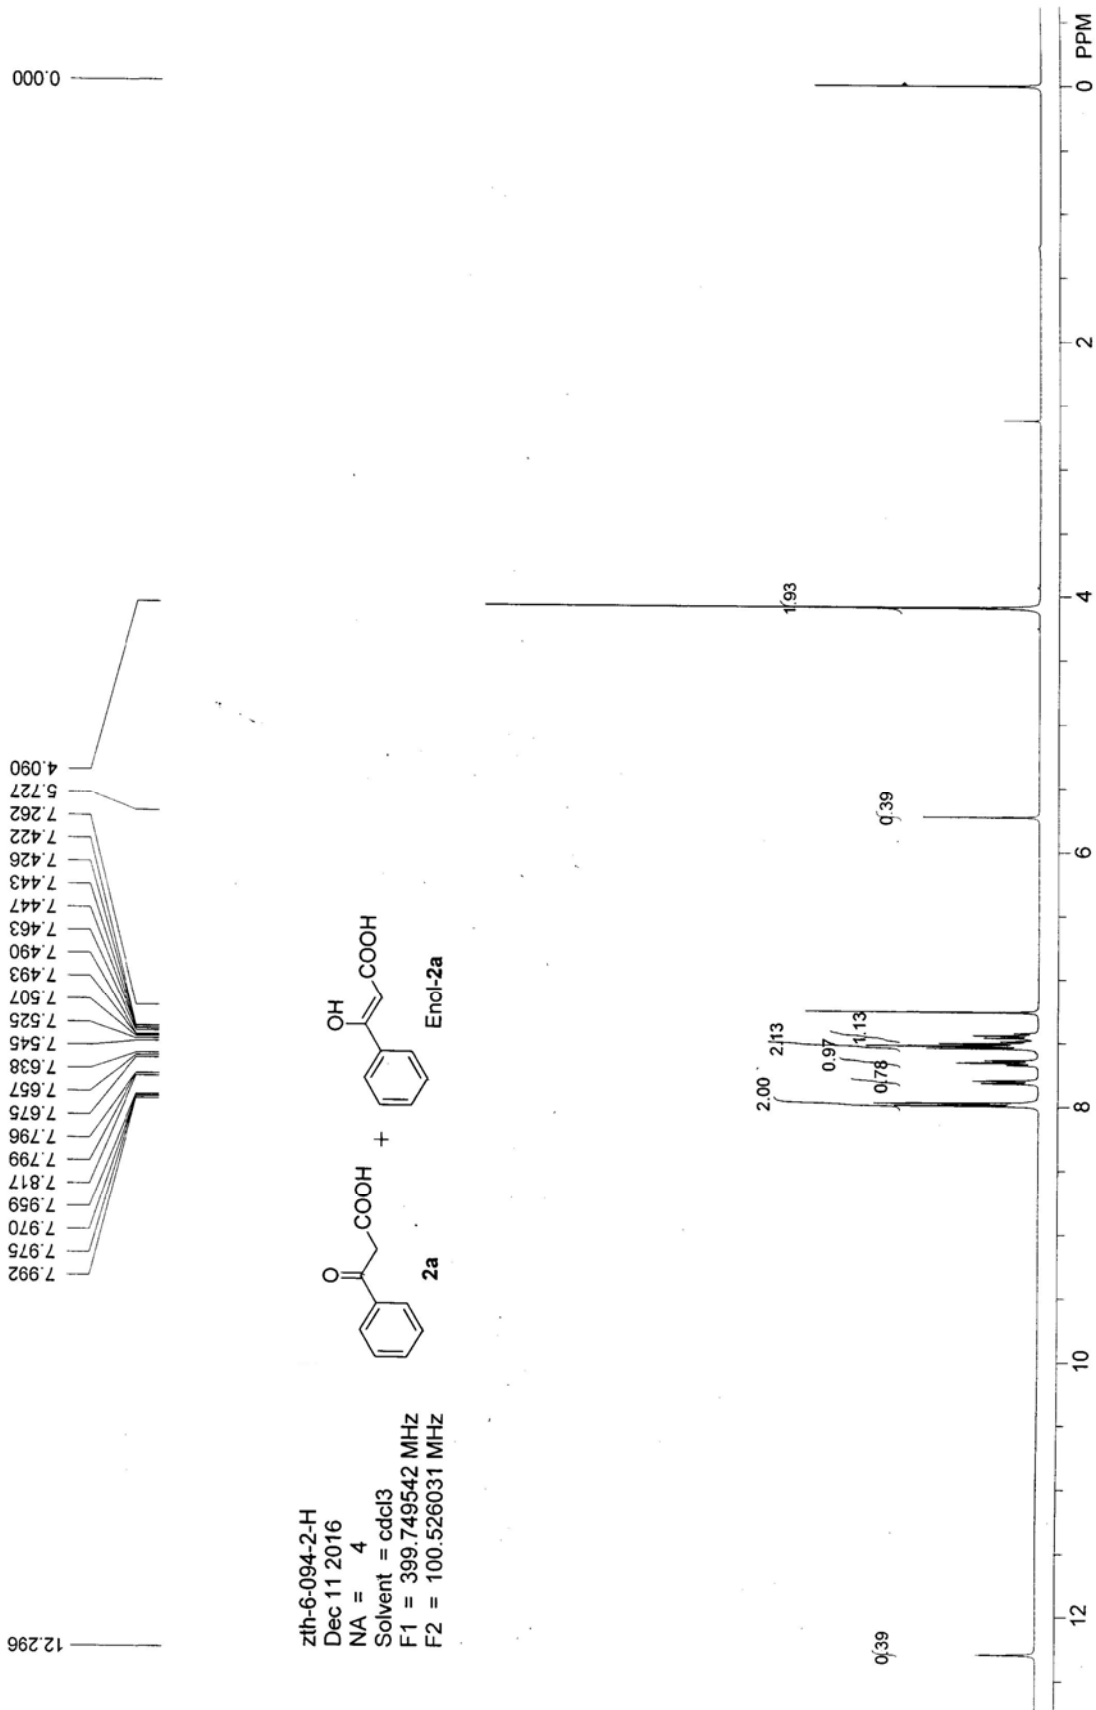

4'-methoxyacetophenone-D (4d-D, zth-6-092)

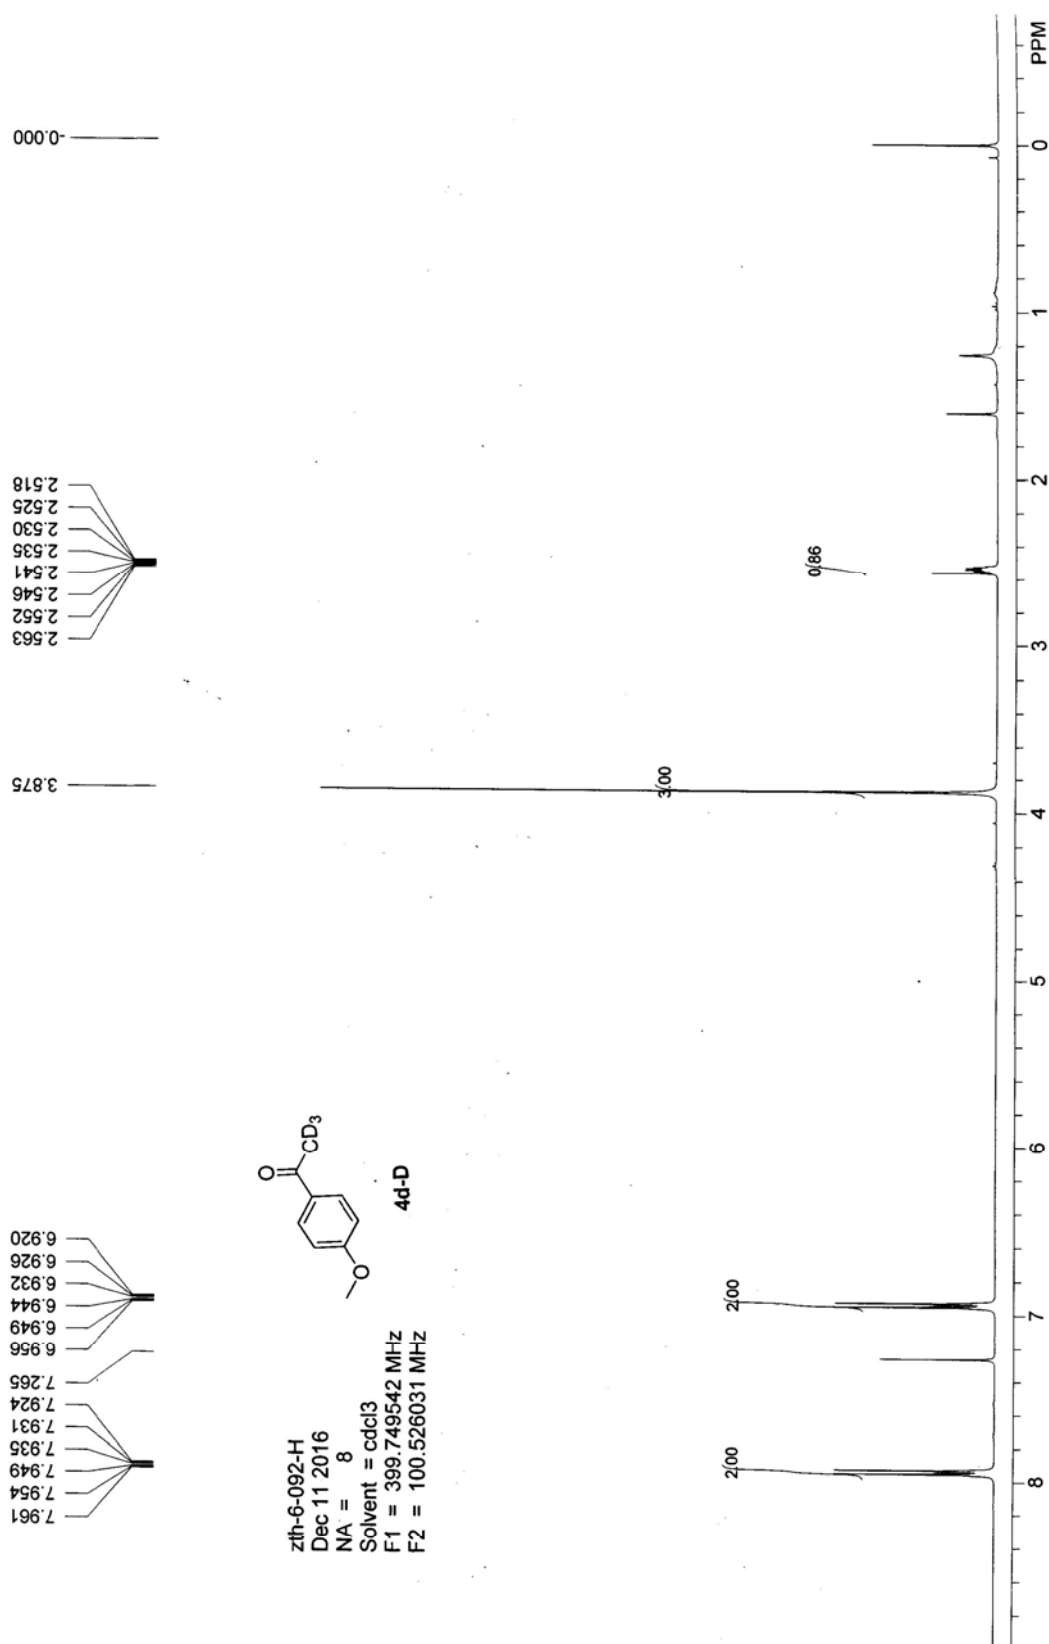

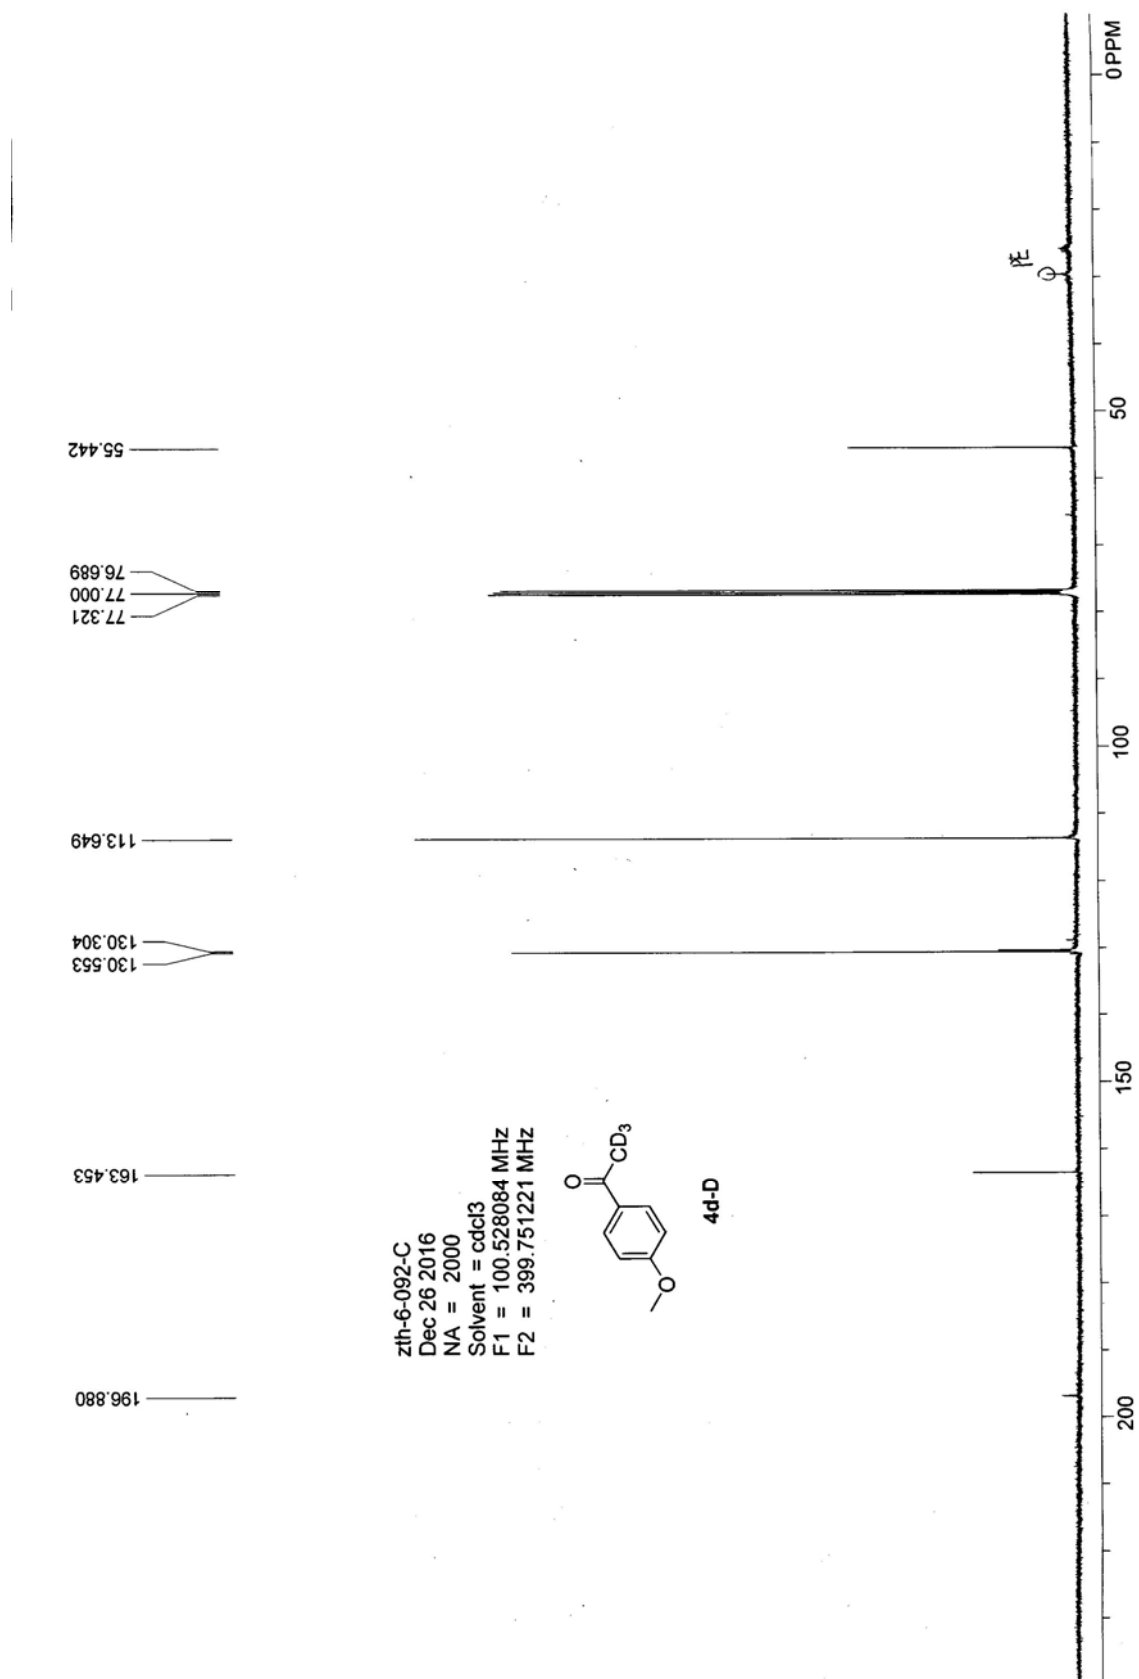

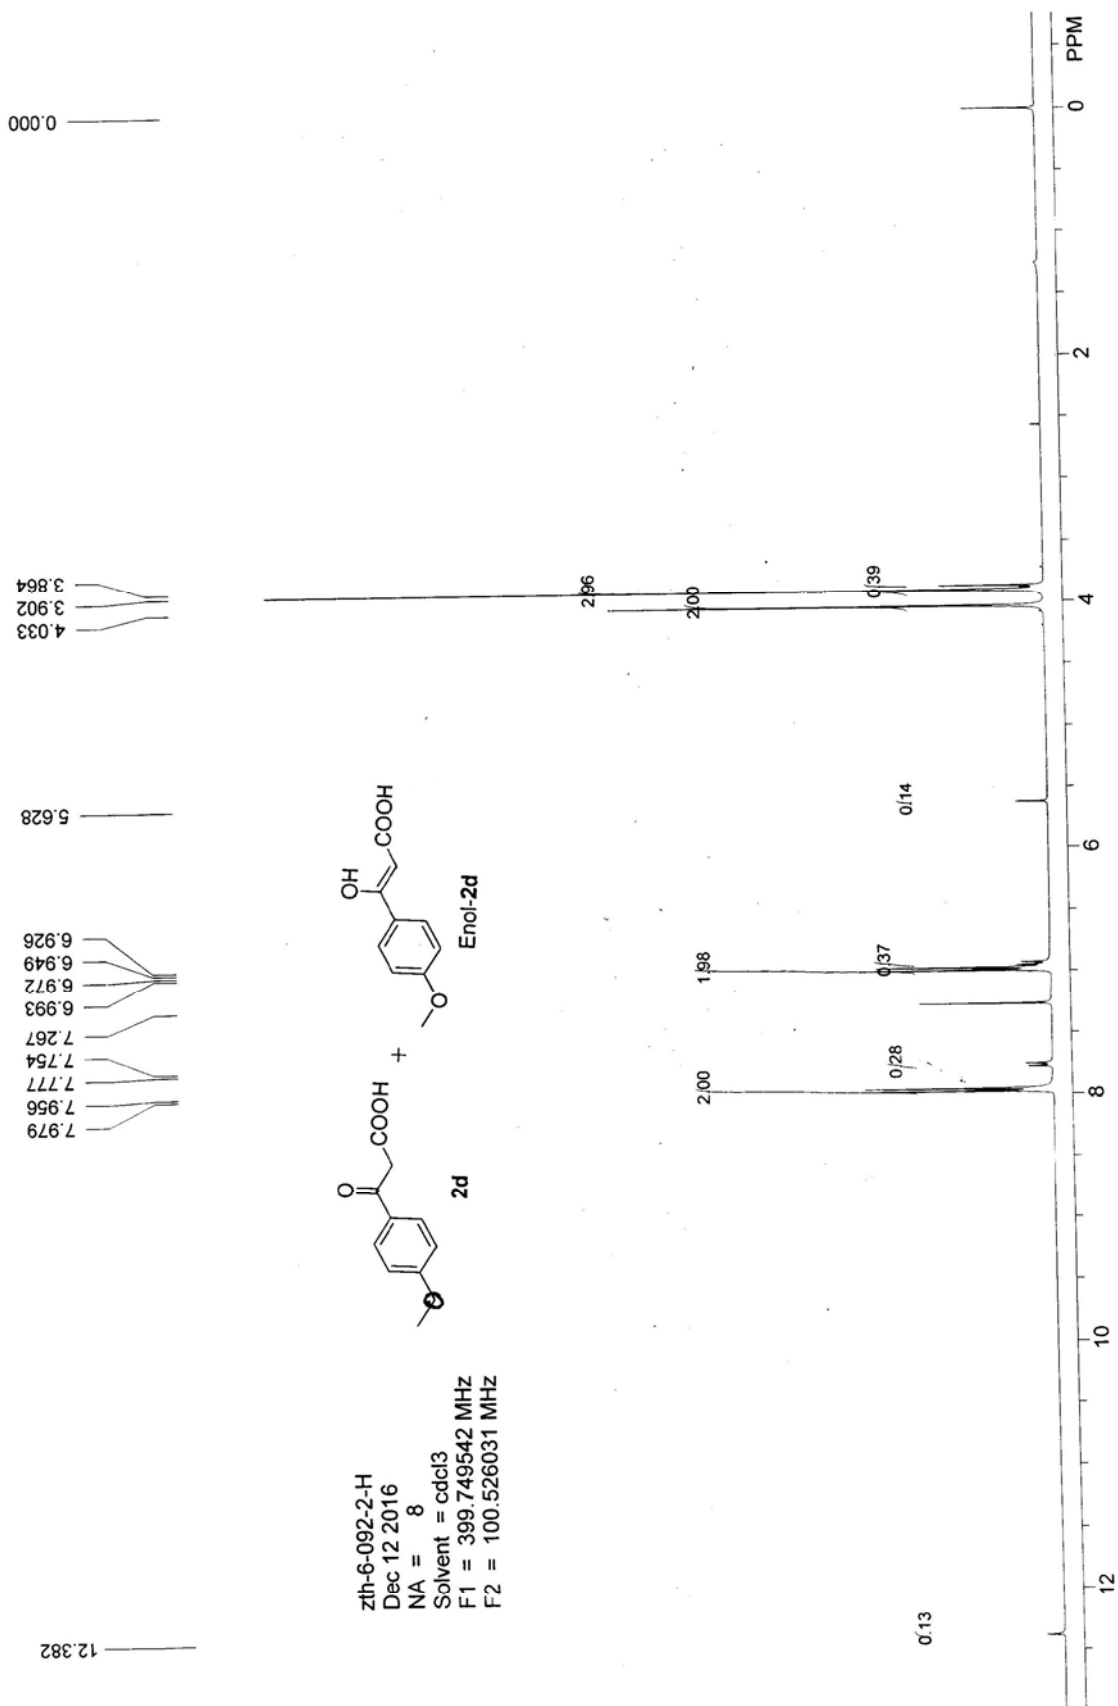

acetophenone 4a (zth-6-097)

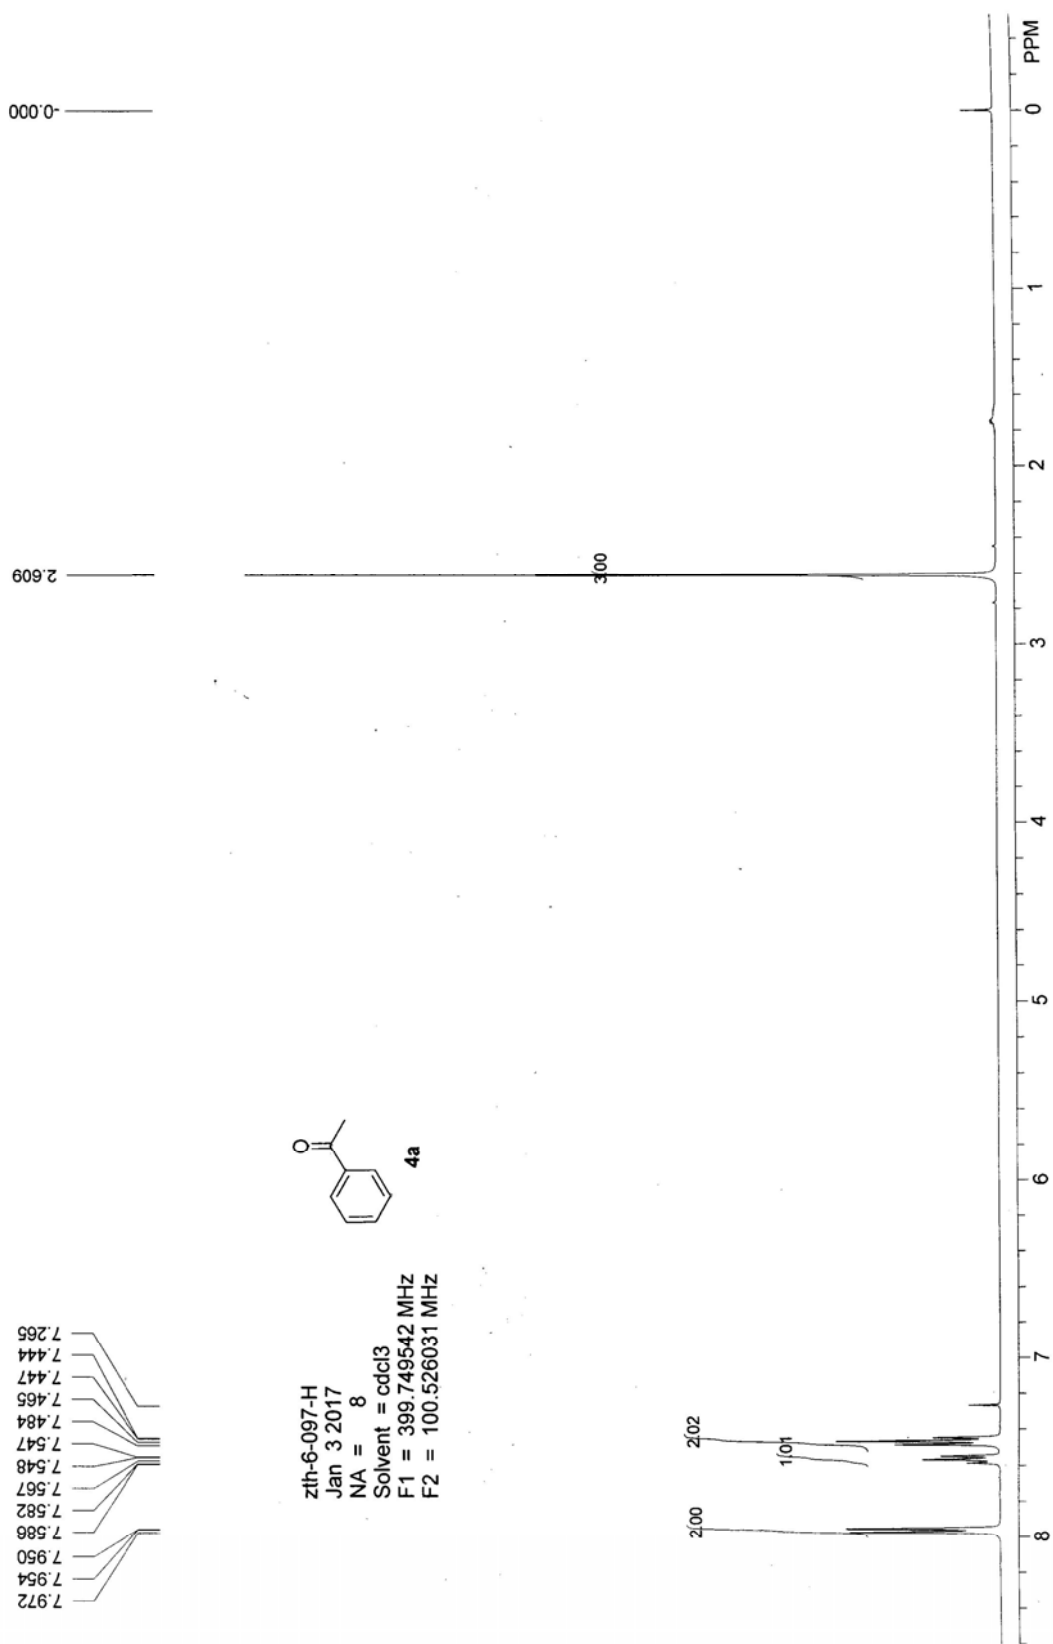

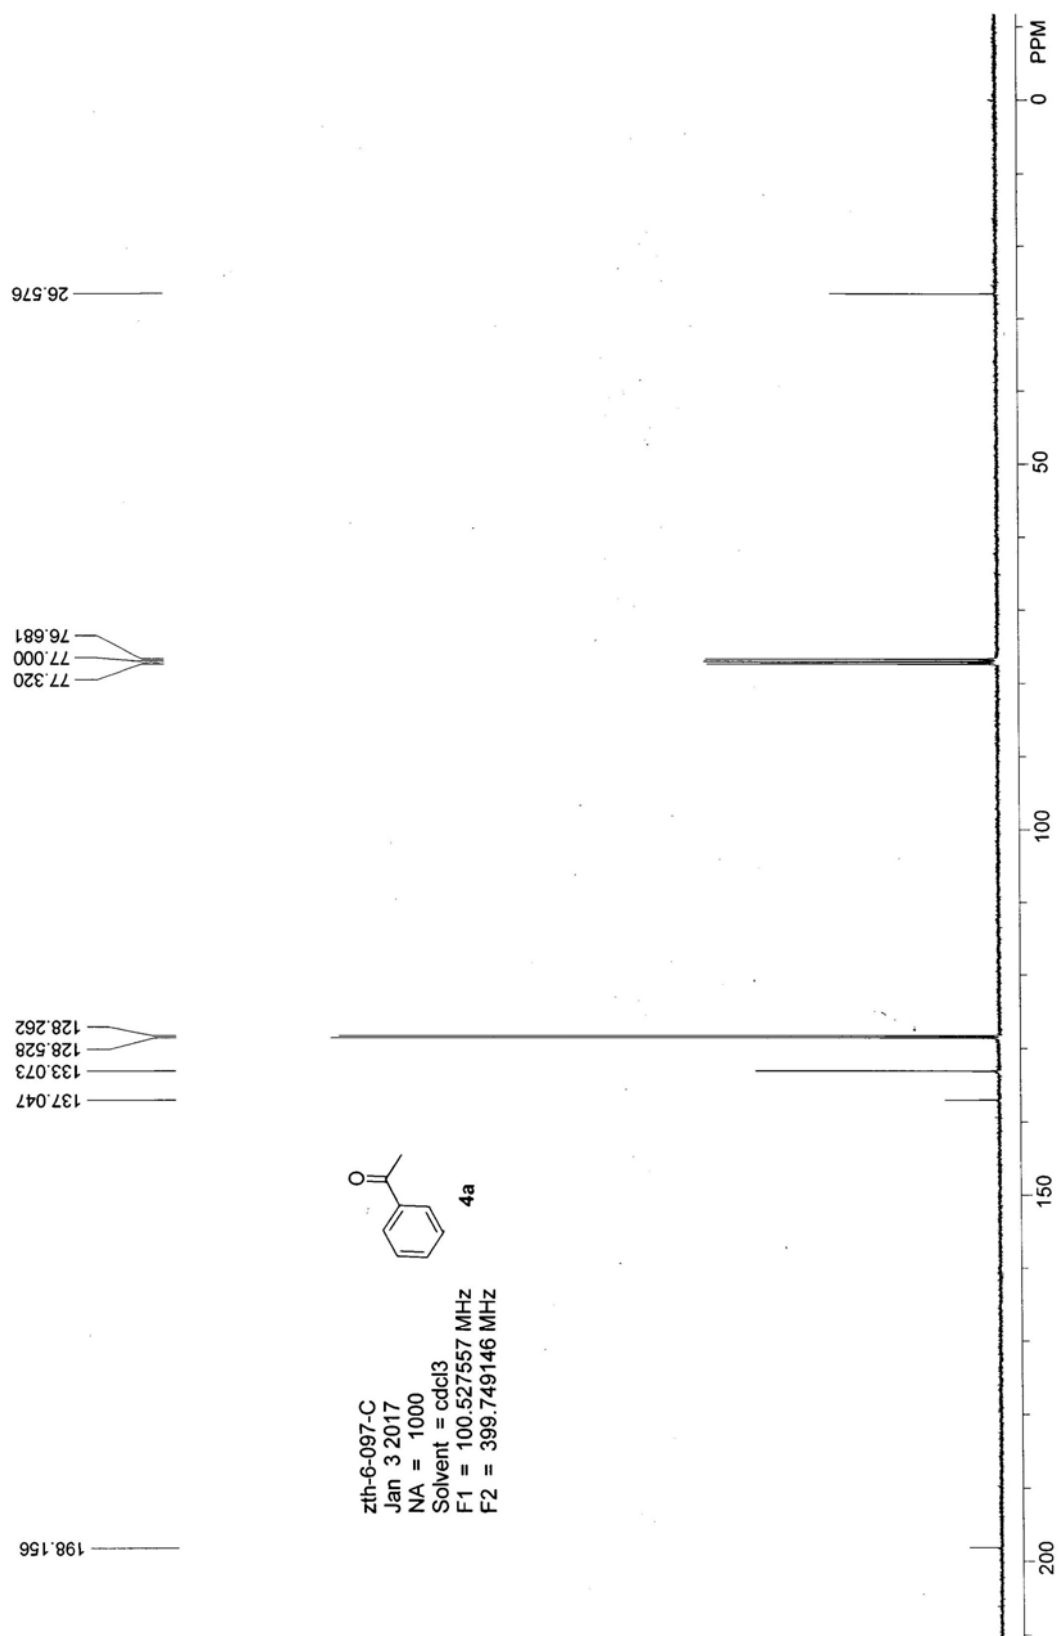



**4'-methoxyacetophenone 4d (zth-6-098)**

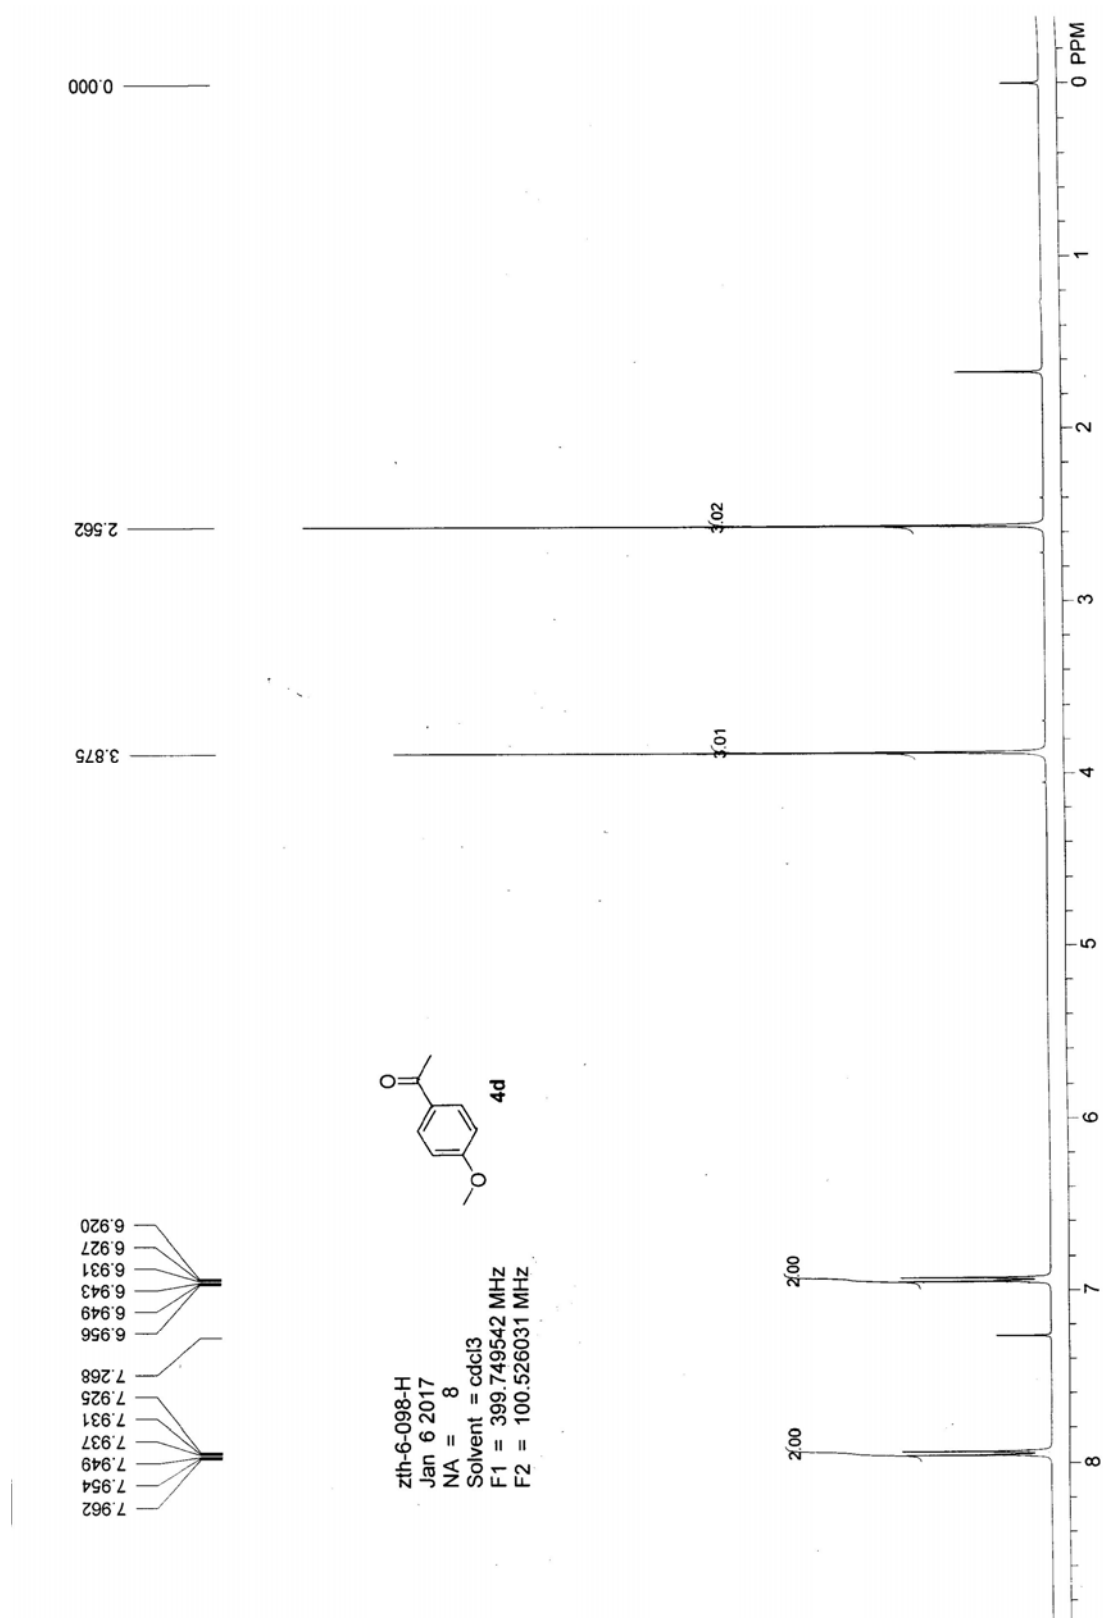

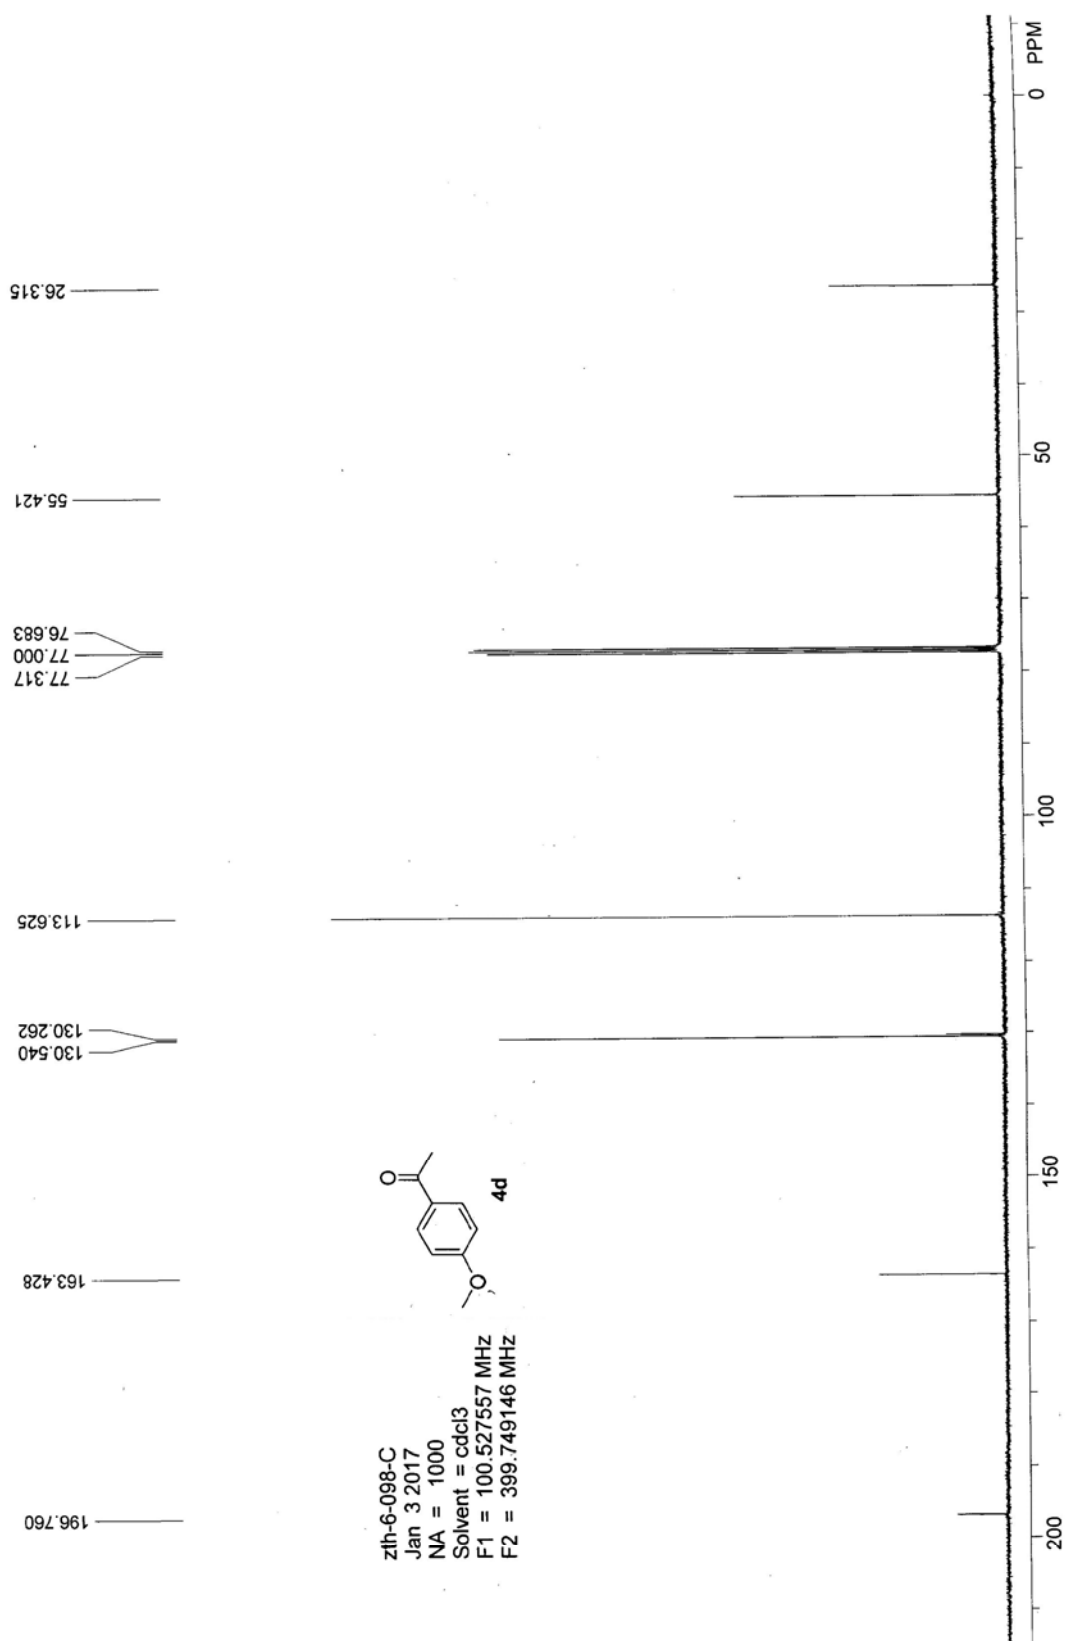

zlh-6-098-C  
Jan 3 2017  
NA = 1000  
Solvent = cdcl3  
F1 = 100.527557 MHz  
F2 = 399.749146 MHz
